# Supplementary material for: Formation of oligopeptides in high yield under simple programmable conditions
Source: PubMed Central journal article supplement (PMC4633627; doi:10.1038/ncomms9385), 2015-10-07
Supplement: ncomms9385-s1.pdf [file ncomms9385-s1.pdf]

''

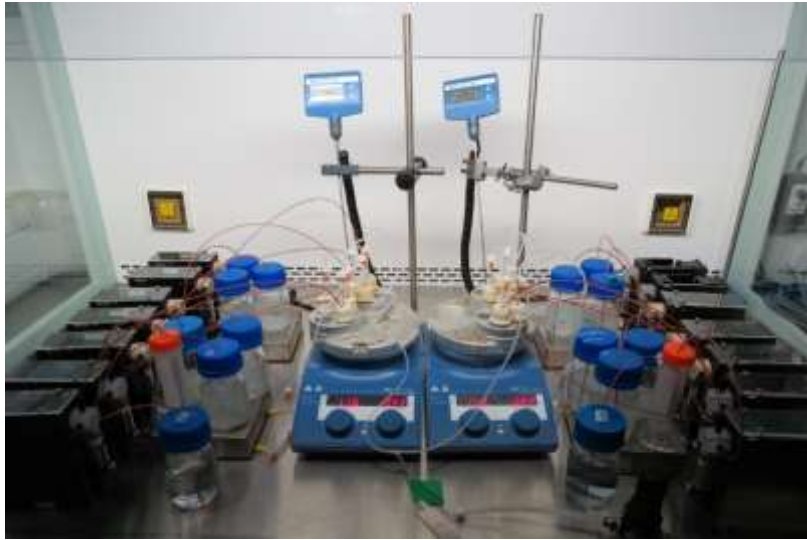

**Supplementary Figure 1:** Photograph of two APS systems in operation.

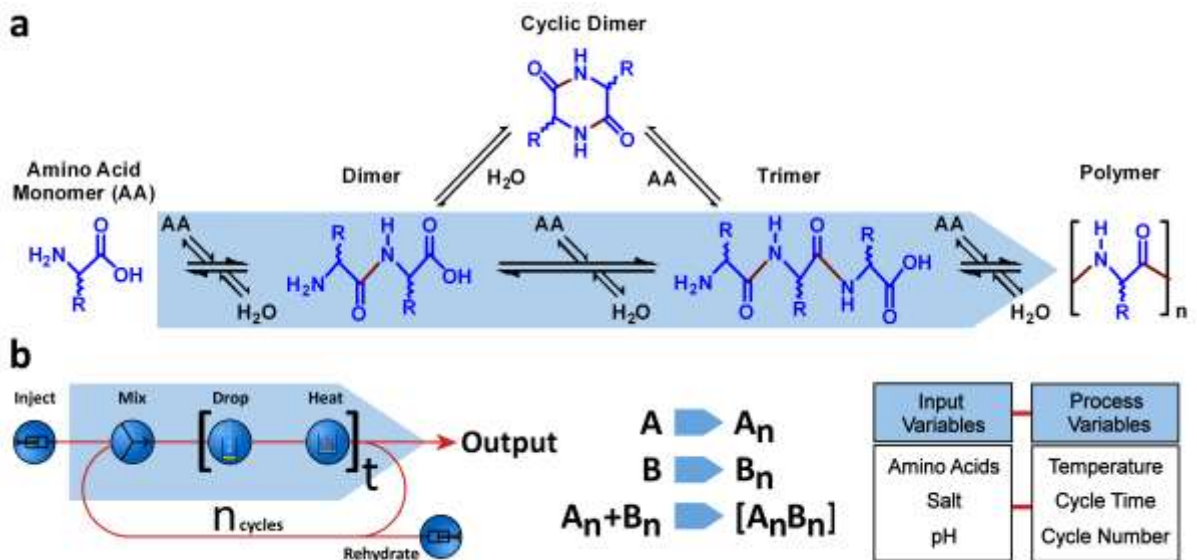

**Supplementary Figure 2:** a) Schematic of peptide bond formation to give oligomers from monomeric amino acids. b) Process flow scheme for the Abiotic Peptide Synthesiser (APS) system: amino acid starting material is added and dehydrated for a given time ( $t$ ) then rehydrated / dehydrated for a given number of cycles ( $n$ ), after which the product outputs are removed for analysis. Single amino acid monomers ( $A$ ,  $B$ ) may be added or, alternatively, mixed amino acid 2-4-mer fragments / higher order oligomers ( $A_n$ ,  $B_n$ ) can be used as starting

materials. Reaction outcome is controlled by selection of input variables and process variables.

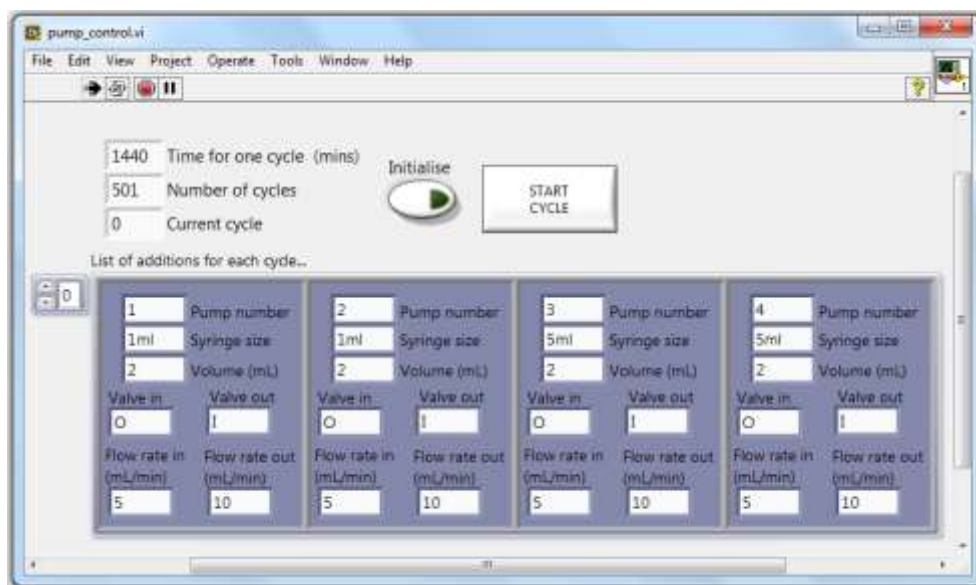

**Supplementary Figure 3:** A screen capture image of the National Instruments LabVIEW control software user interface. The software is designed specifically for the control of the experiment described in the manuscript, which features cyclic movement of fluids via Tricontinent syringe pumps. The “Time for one cycle,” and “Number of cycles,” are set by the user, and the software displays the “Current cycle,” once the experiment begins. Each pump instruction in the cycle is determined by an element in the array “List of additions for each cycle...”. Each element requires the user to input the pump number to be addressed (up to 16 pumps), the size of the syringe that that pump is equipped with, the Volume (ml) to be pumped, the valve positions (i.e. where to pump the fluid), and the speed at which to pump. Note that the Volume can be greater than the syringe size, in which case the pump performs the instruction in multiple steps. Shown in this image are the instructions for pumps 1 – 4, however further elements can be added or removed prior to starting the experiment. Once the controls are set correctly, “Start Cycle” begins the experiment. Alternatively, “Initialise” can be used to empty all syringes.

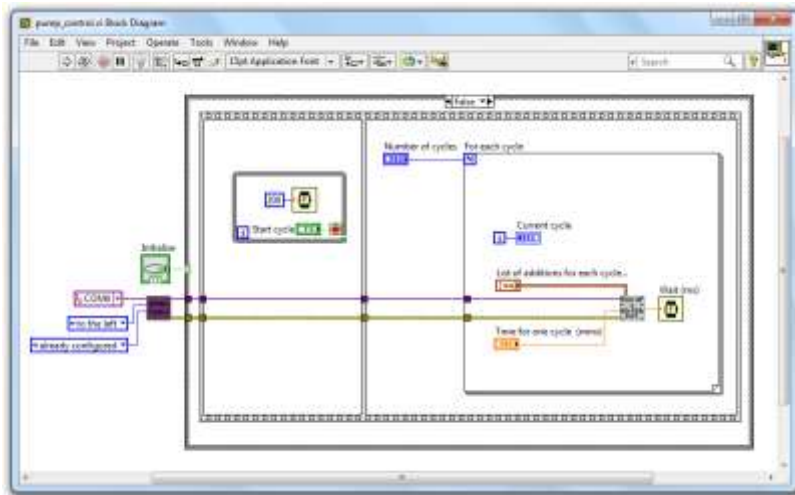

**Supplementary Figure 4:** The National Instruments LabVIEW software Block Diagram associated with the Front Panel in Fig. S3. The pump configuration is hard-wired into an initialisation Sub VI. Shown is the non-initialisation case, the software waits for the user to click “Start Cycle”. A “For” loop, named “For each cycle,” then runs for the “Number of Cycles,” set up the user. A Sub VI named “Pick up and Deliver (dist vale).vi,” reads the “List of additions for each cycle...,” and executes them in parallel, then outputs the remaining “Wait (ms)” time in milliseconds which is used to delay to next iteration of the experiment.

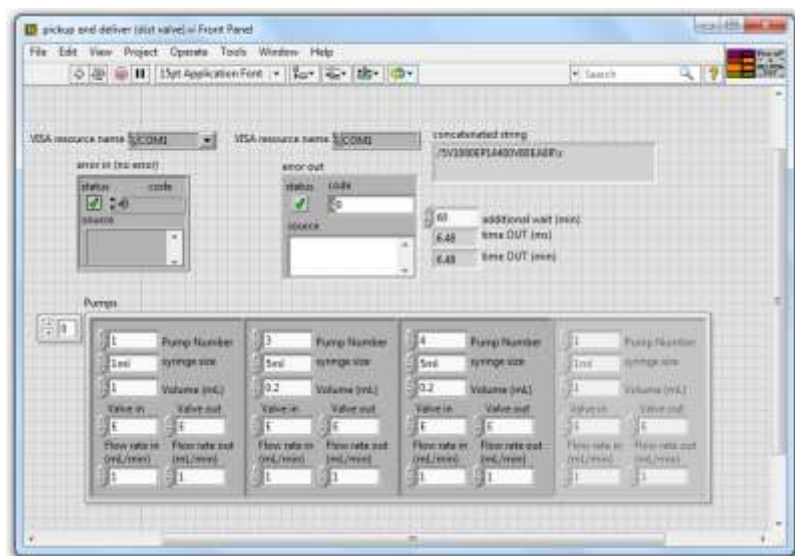

**Supplementary Figure 5:** A screen shot of the front panel of the “Pick up and Deliver (dist vale).vi” Sub VI as used by the “pump\_control.vi”. The function of this VI is to convert the



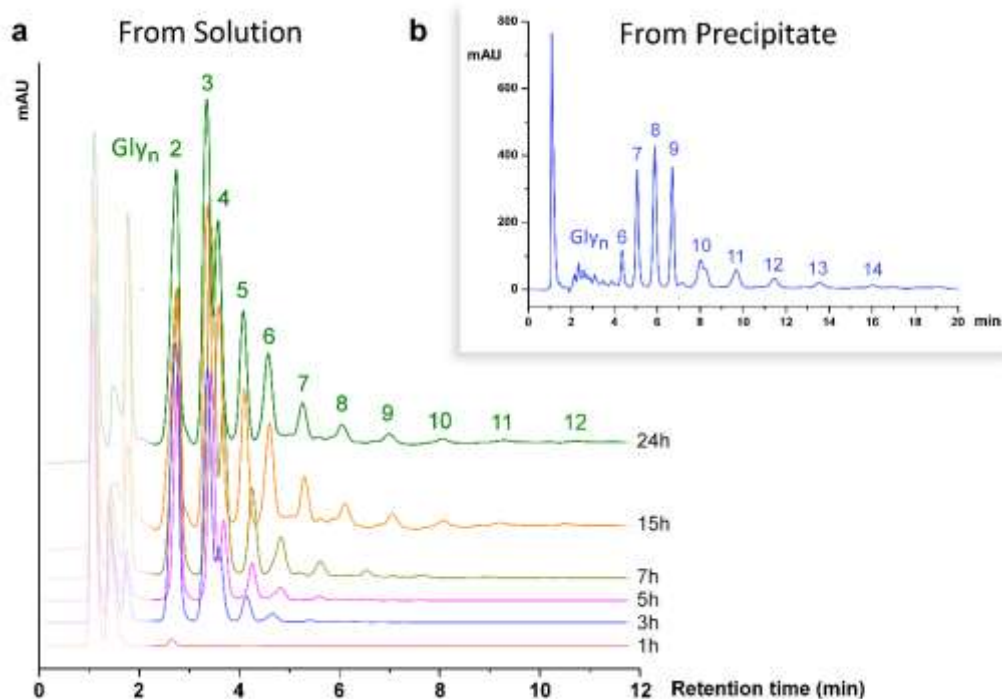

**Supplementary Figure 7:** a) Ion pairing HPLC chromatograms of a standard glycine condensation reaction, showing oligomer length increasing with dehydration time (between 1 and 24 hours). The traces prior to elution of (Gly)<sub>2</sub> are faded for clarity; this region includes peaks due to glycine monomer and cyclic glycine dimer (diketopiperazine - DKP) along with any ionic/polar contaminants and ‘method peaks’. b) Similar analysis of the solid precipitate formed during the reaction taken up in a 0.1 % TFA/H<sub>2</sub>O solution, showing longer (sparingly soluble) oligomers. In both (a) and (b), Gly<sub>n</sub> oligomer peaks are labelled with the corresponding value of n; assignment of the peaks was established both by comparison to Gly standards, and by separate mass spec. confirmation of the presence of oligomers.

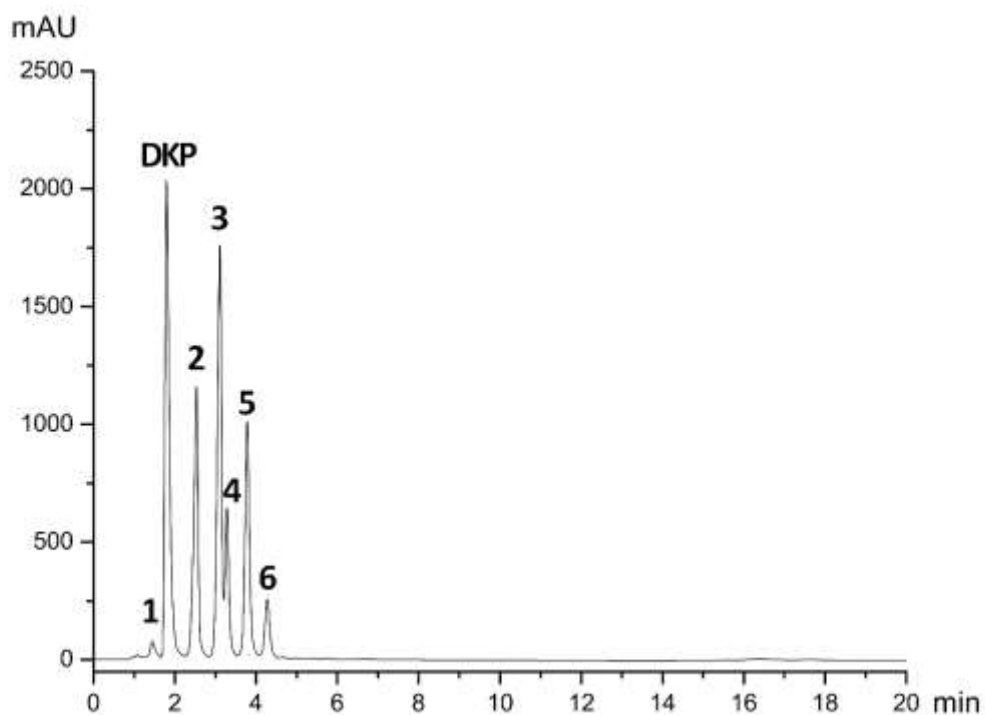

**Supplementary Figure 8:** IP-HPLC chromatogram of Gly<sub>n</sub> oligomer standards.

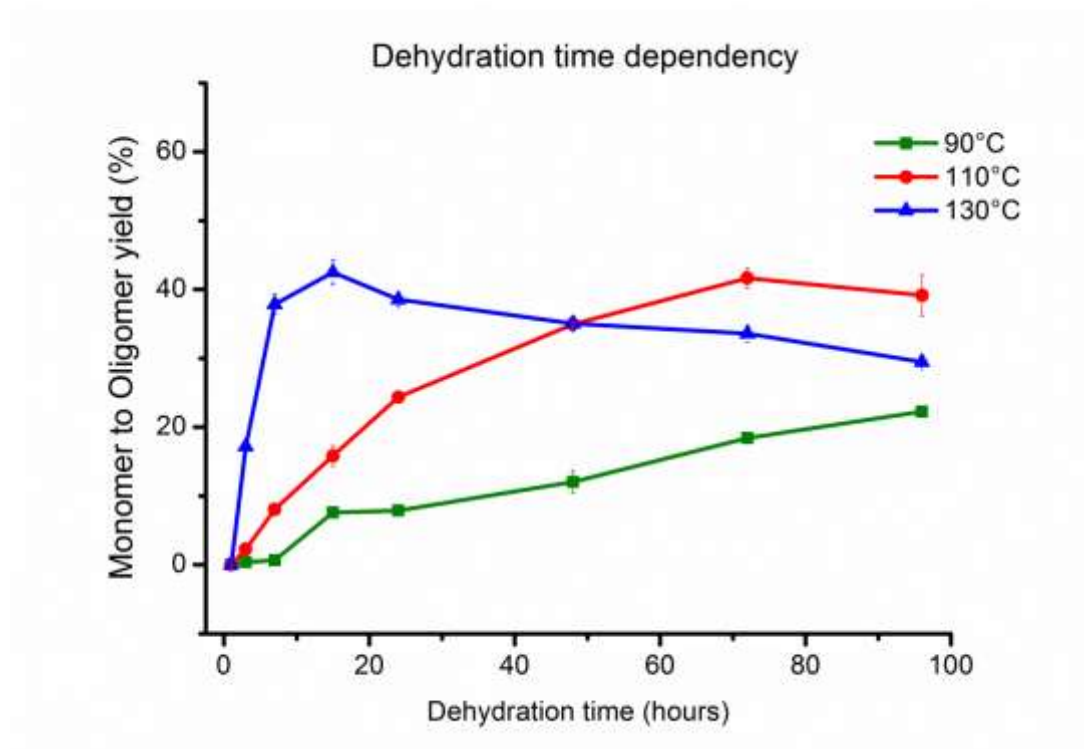

**Supplementary Figure 9:** Monomer to Oligomer yield (%) vs. dehydration time at 90°C, 110°C and 130°C.



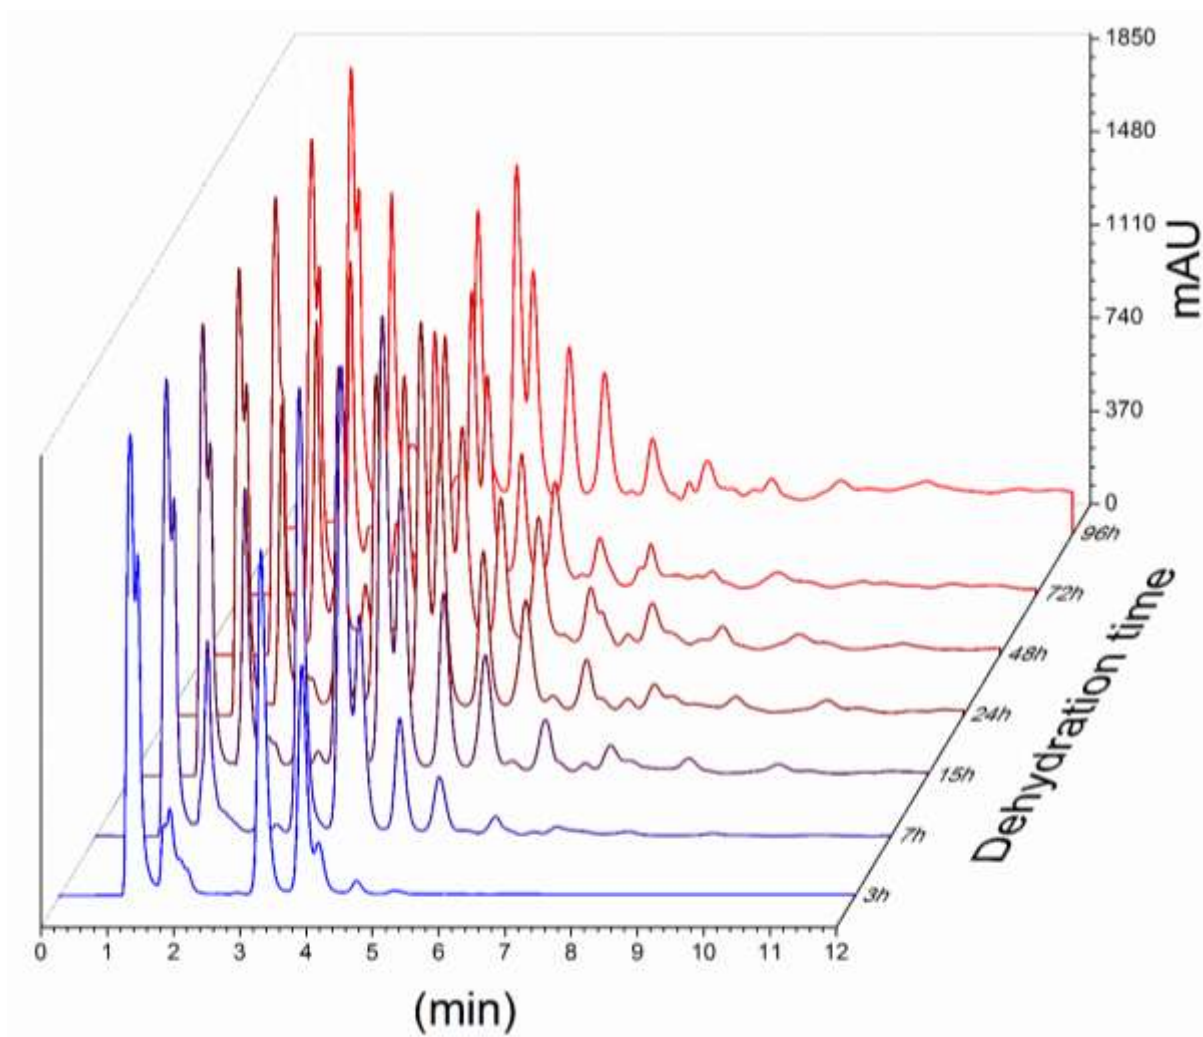

**Supplementary Figure 10:** IP-HPLC chromatograms showing the oligomerisation products of glycine as a function of the dehydration time at 130°C.

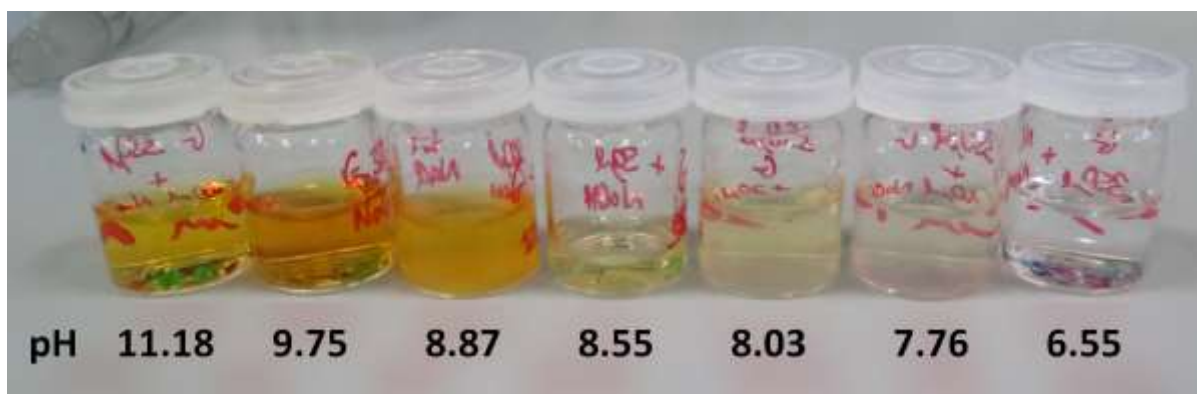

**Supplementary Figure 11:** Correlation between the pH and the browning produced by decomposition processes.

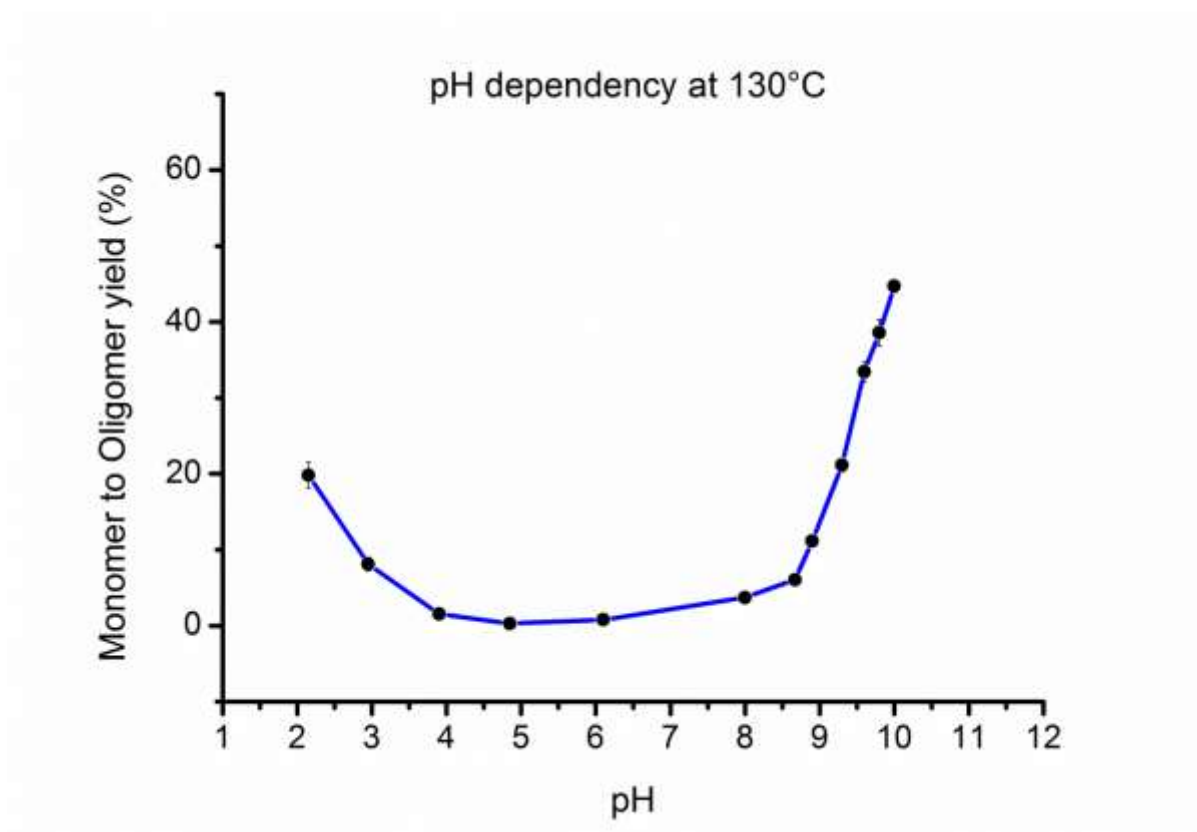

**Supplementary Figure 12:** Monomer to Oligomer yield (%) vs. pH at 130°C for a single dehydration cycle (24h).



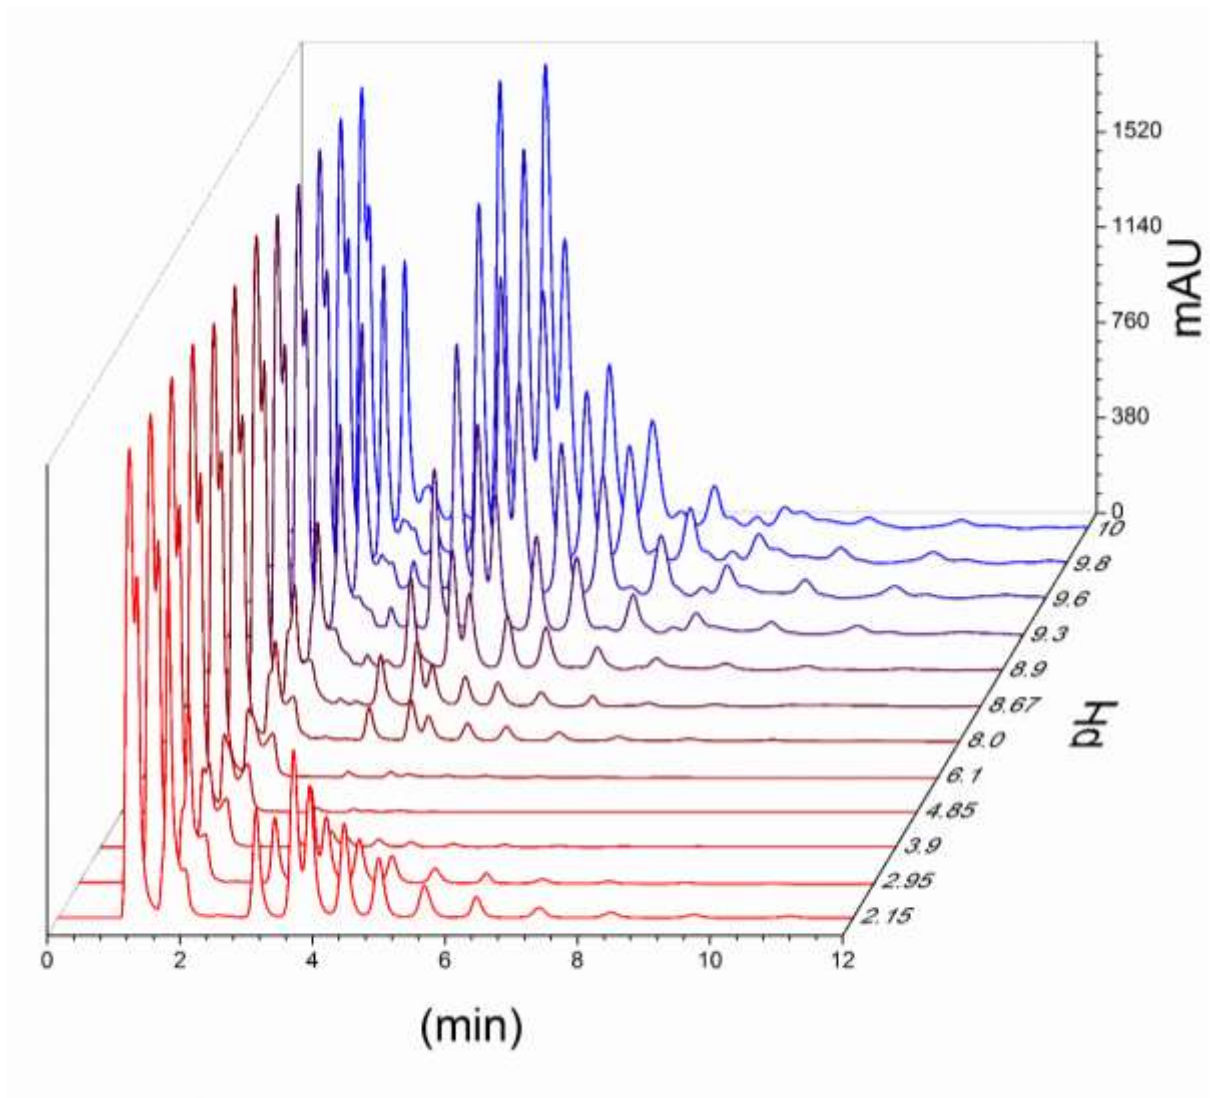

**Supplementary Figure 13:** IP-HPLC chromatograms showing the oligomerisation products of glycine as a function of the pH in a single dehydration cycle (24h) at 130°C.

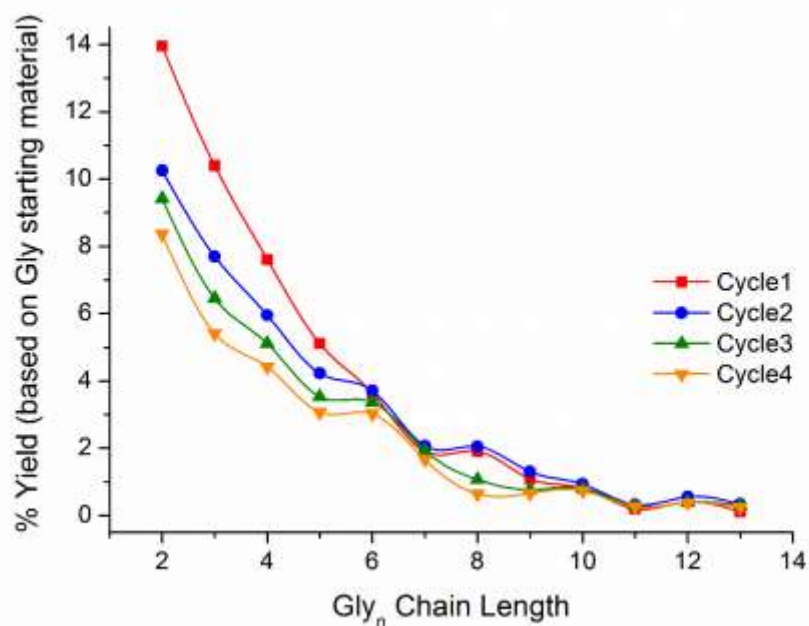

**Supplementary Figure 14:** Distribution of Gly<sub>n</sub> chain lengths as a function of dehydration cycle number (oligomer yields expressed as % of initial Gly added).

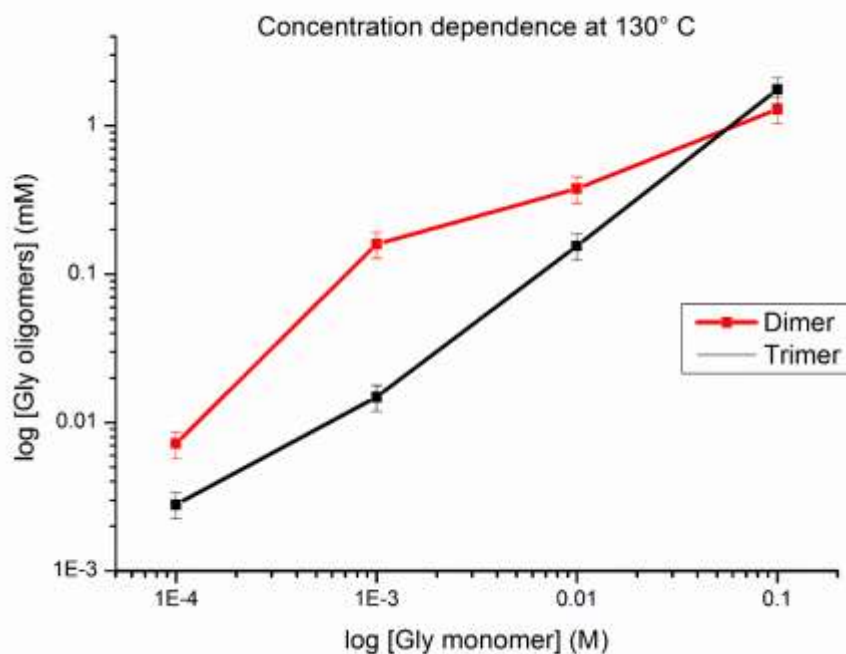

**Supplementary Figure 15:** Log-log plot of the concentration of glycine oligomers formed against glycine monomer input concentration.

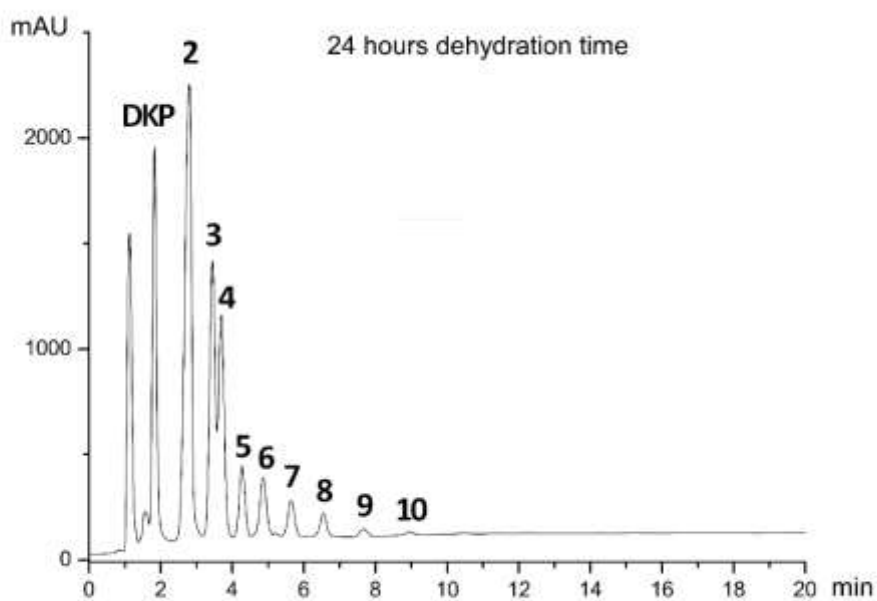

**Supplementary Figure 16:** IP-HPLC chromatogram of DKP oligomerisation products (24h, 130°C).

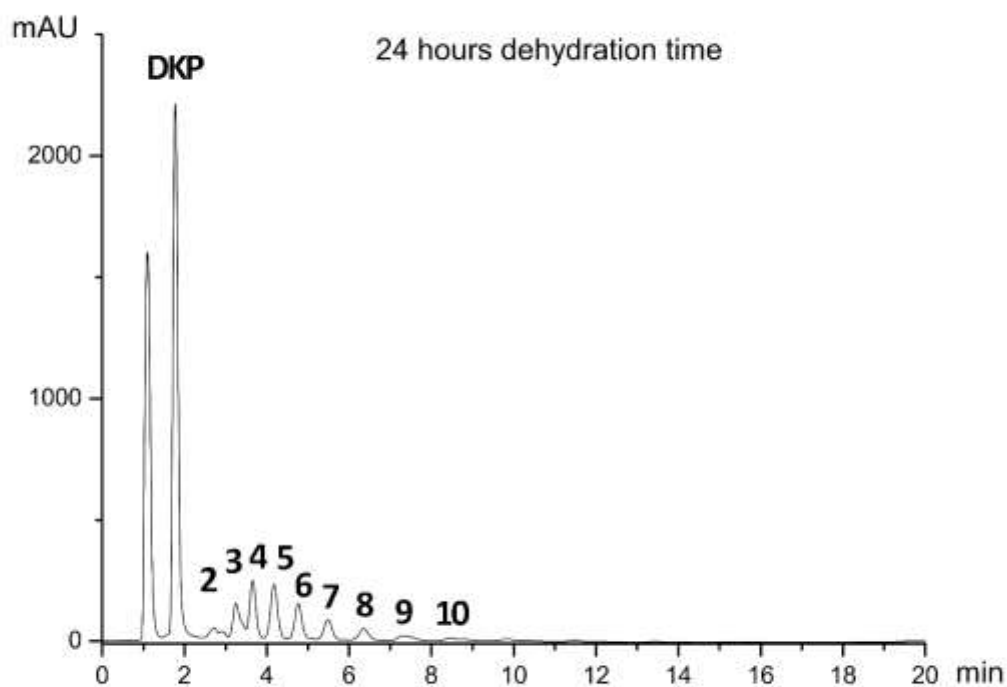

**Supplementary Figure 17:** IP-HPLC chromatogram of glycinamide oligomerisation products (24h, 130°C).

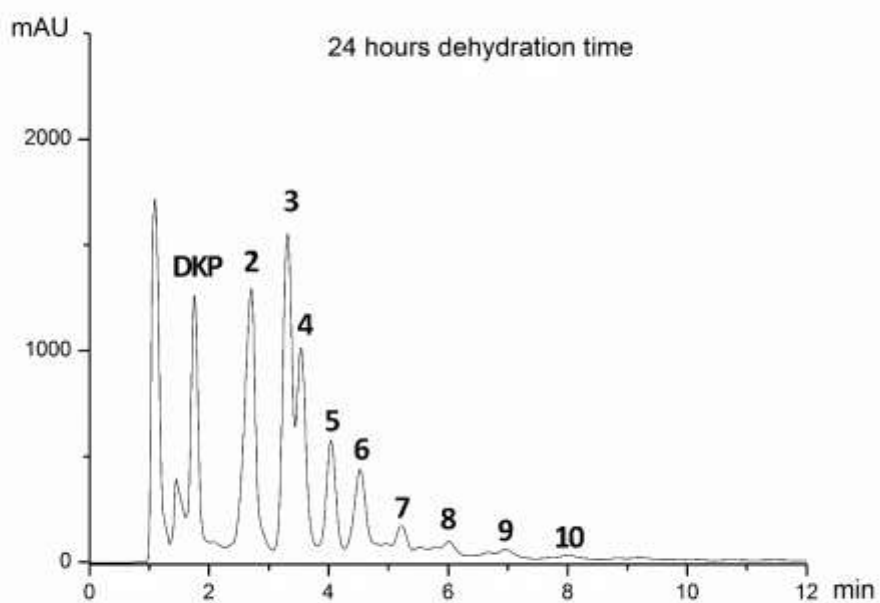

**Supplementary Figure 18:** IP-HPLC chromatogram of glycine oligomerisation products (24h, 130°C) where a Teflon reaction vessel was used.

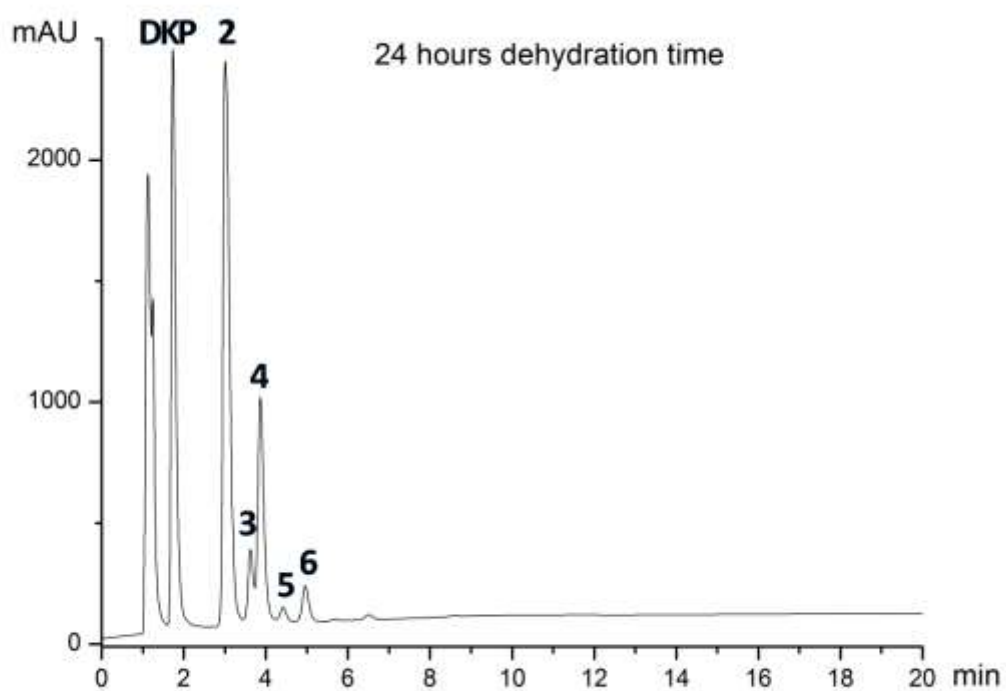

**Supplementary Figure 19:** IP-HPLC chromatogram of glycyglycine oligomerisation products (24h, 110°C).

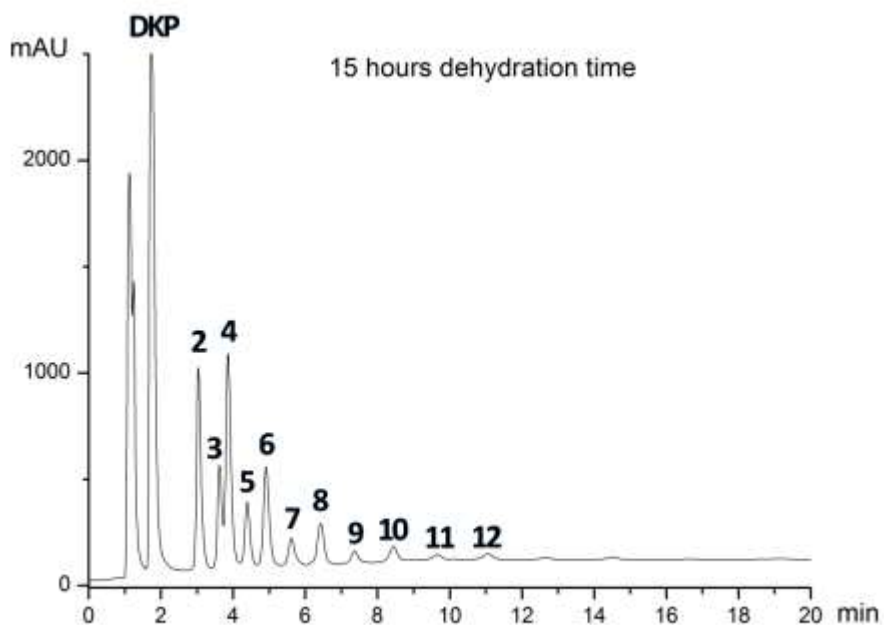

**Supplementary Figure 20:** IP-HPLC chromatogram of glycyglycine oligomerisation products (15h, 130°C).

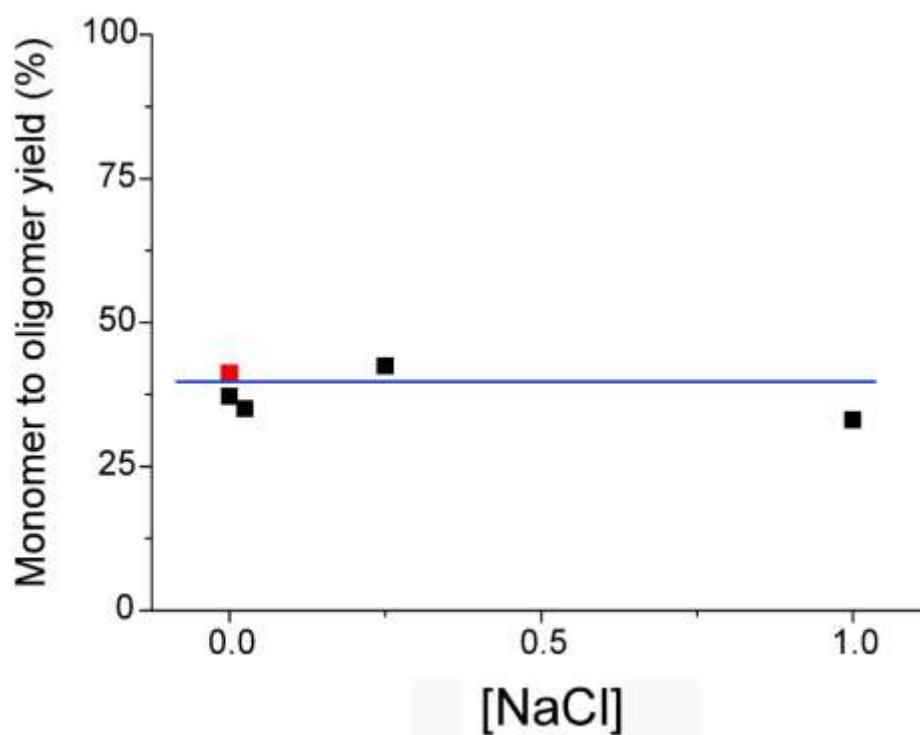

**Supplementary Figure 21:** Monomer to Oligomer yield (%) vs. added [NaCl] (M). The red point indicates the yield obtained in an experiment ran under the same conditions, but using LiOH to adjust the pH in the absence of NaCl.

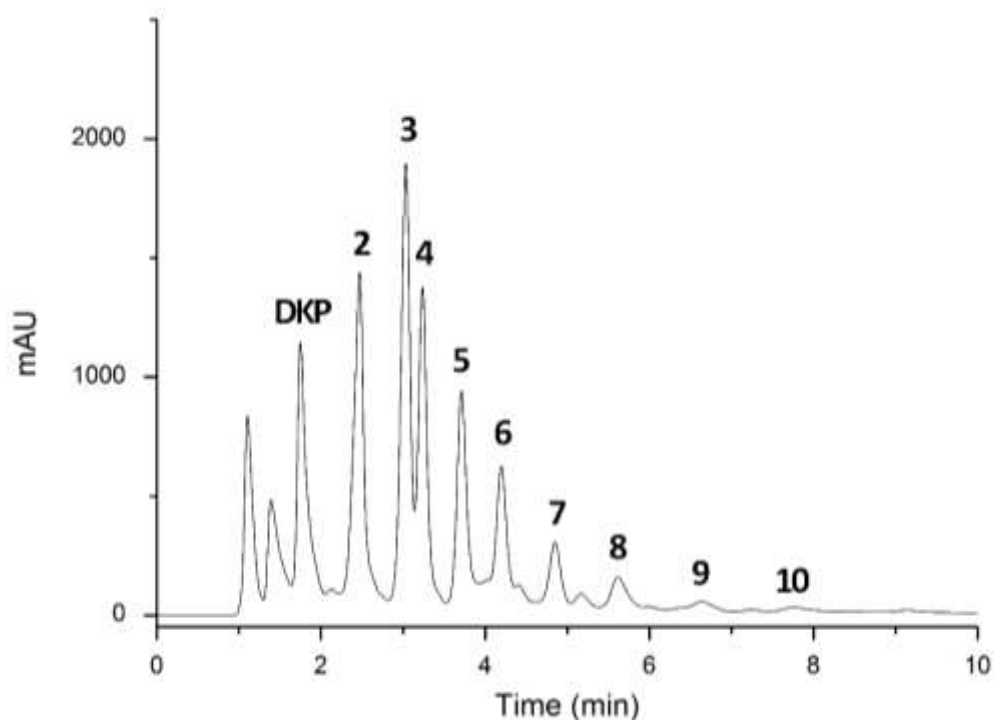

**Supplementary Figure 22:** IP-HPLC chromatogram of glycine oligomerisation products corresponding to the black point at an added  $[\text{NaCl}] = 0$  in the previous plot. In this sample, glycine ( $350\mu\text{l}$  from a  $1\text{M}$  Gly solution, so  $3.5 \cdot 10^{-4}$  moles) was diluted in a total volume of  $4\text{ml}$ . The pH was adjusted to  $9.75$  by adding  $100\mu\text{l}$  of a  $1\text{M}$  NaOH solution. No NaCl was added.

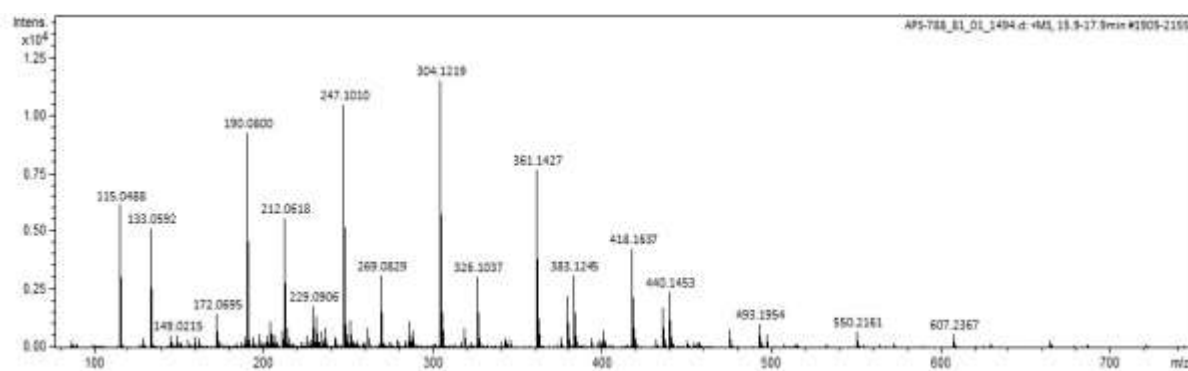

**Supplementary Figure 23:** MS-spectra corresponding to the glycine oligomerisation products from the reaction described in the figure above on elution from a Phenomenex Polysep 1000 SEC column ( $50\text{ mM}$  ammonium acetate w/  $10\%$  v/v acetonitrile). Glycine oligomeric peaks up to 10-mer can be identified as  $\text{H}^+$  adducts (along with a series of  $\text{NH}_4^+$  adducts).



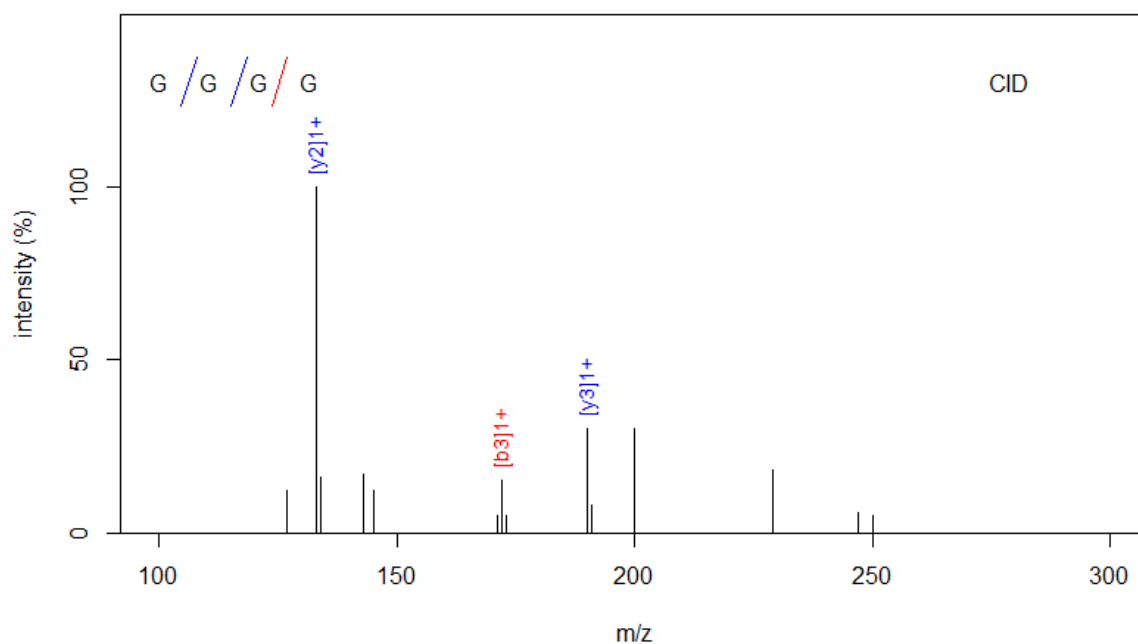

**Supplementary Figure 24:** MS/MS of fragmentation products of ion assigned as Gly<sub>4</sub> oligomer (m/z = 247.104); experimental data matches fragmentation products calculated for GGGG sequence.

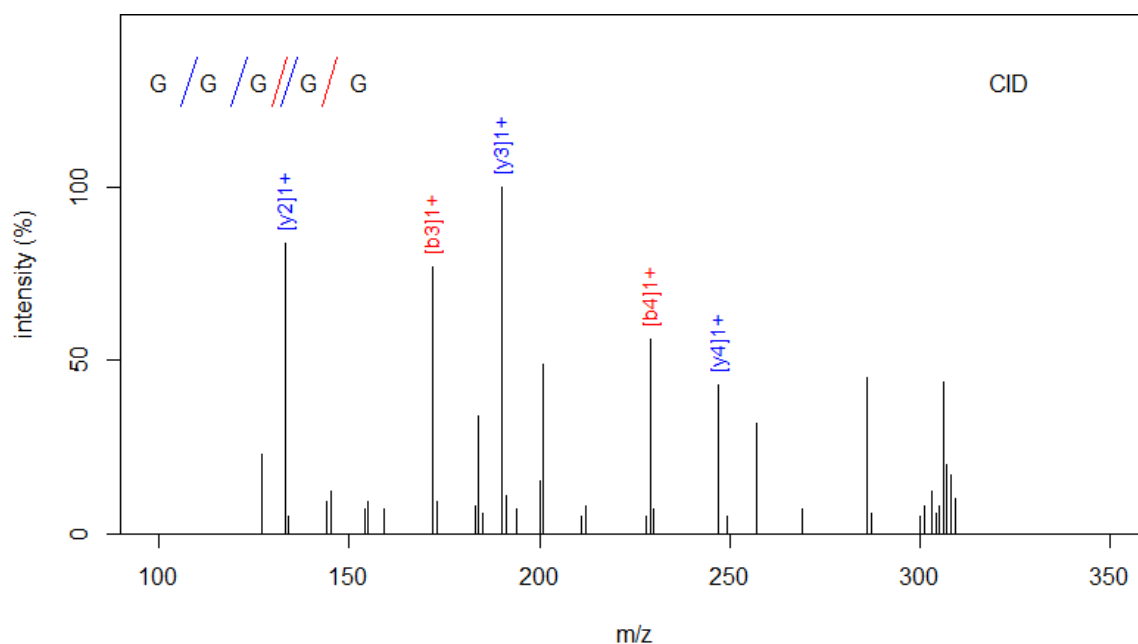

**Supplementary Figure 25:** MS/MS of fragmentation products of ion assigned as Gly<sub>5</sub> oligomer (m/z = 304.125); experimental data matches fragmentation products calculated for GGGGG sequence.

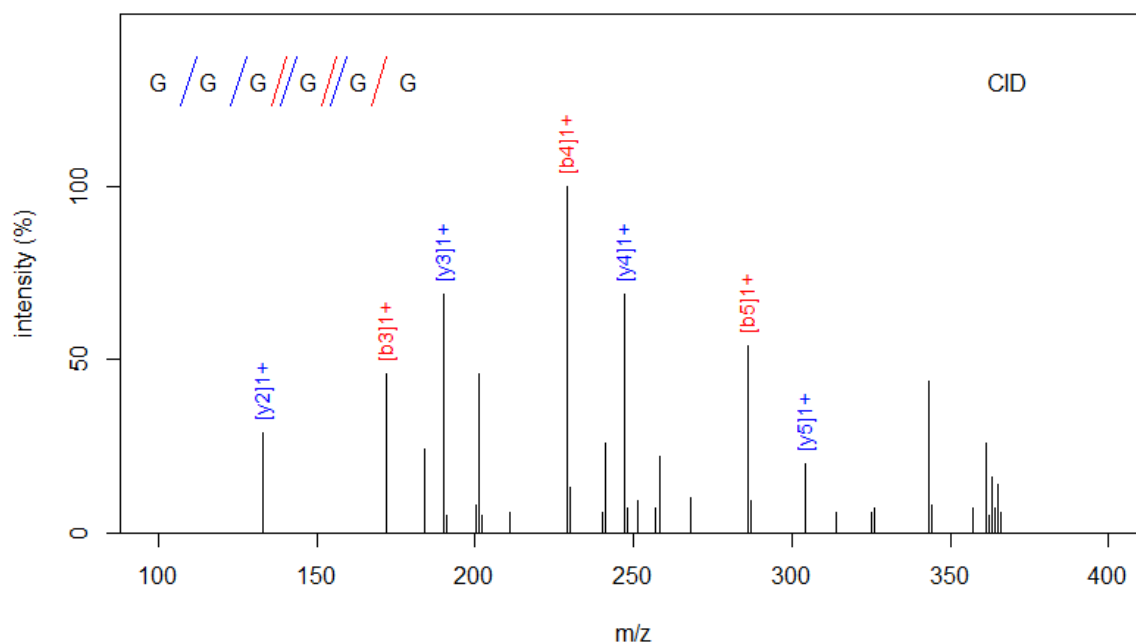

**Supplementary Figure 26:** MS/MS of fragmentation products of ion assigned as Gly<sub>6</sub> oligomer (m/z = 361.147); experimental data matches fragmentation products calculated for GGGGGG sequence.

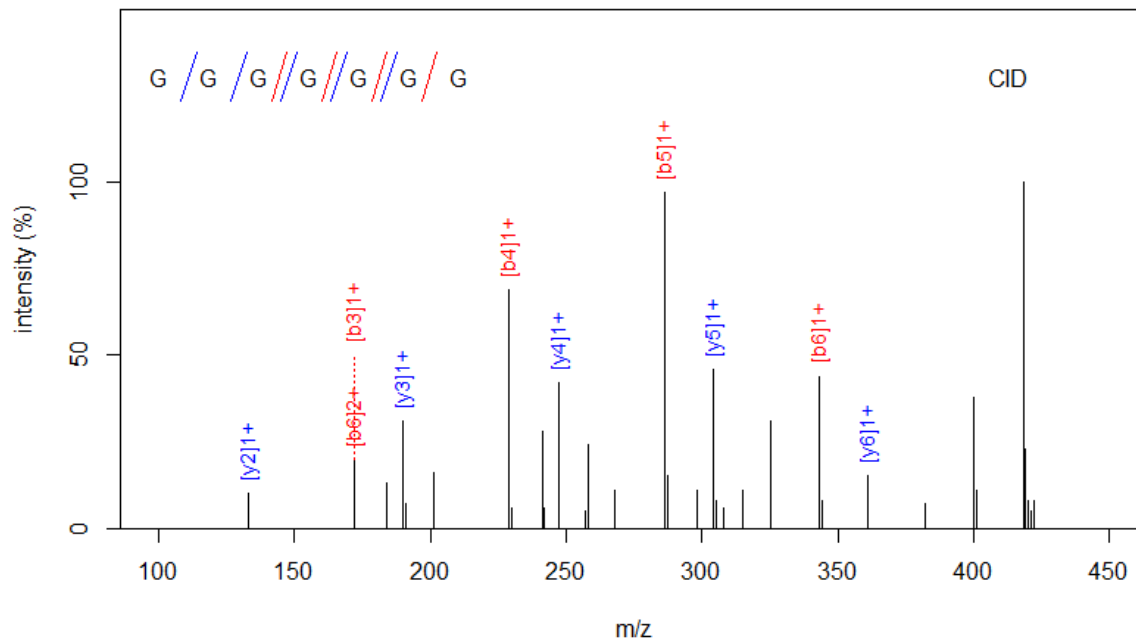

**Supplementary Figure 27:** MS/MS of fragmentation products of ion assigned as Gly<sub>7</sub> oligomer (m/z = 418.168); experimental data matches fragmentation products calculated for GGGGGGG sequence.

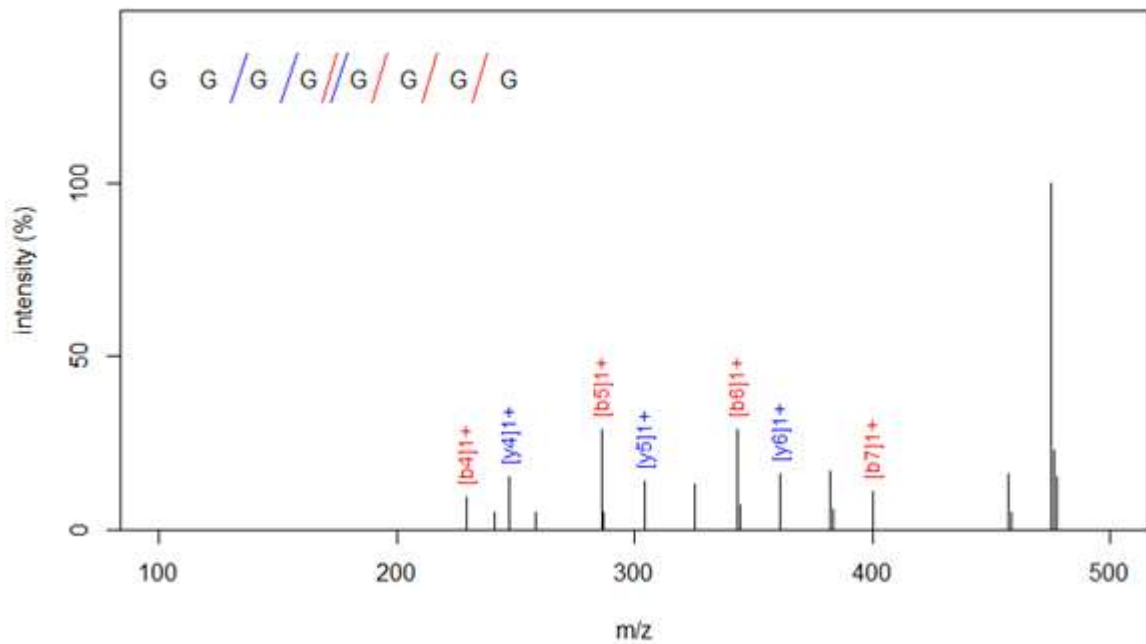

**Supplementary Figure 28:** MS/MS of fragmentation products of ion assigned as Gly<sub>8</sub> oligomer (m/z = 475.190); experimental data matches fragmentation products calculated for GGGGGGGG sequence.

APS-463 MW=?  
(H<sub>2</sub>O)<sub>2</sub>H<sub>2</sub>O: MeOH 1:1+ 10% Formic Acid  
Glycine Oligomers: CH<sub>4</sub>N-(C<sub>2</sub>H<sub>3</sub>NO)<sub>n</sub>-CHO<sub>2</sub>

EPSRC National Facility Swansea  
LTO Orbitrap XL

Marc Rodriguez Garcia  
08/01/2015 08:35:27

GLACRO005-OA-HNESP-2 #28-45 RT: 0.65-1.05 AV: 16 SM: 7G NL: 1.71E6  
T: FTMS + p NSI Full ms [140.00-1935.00]

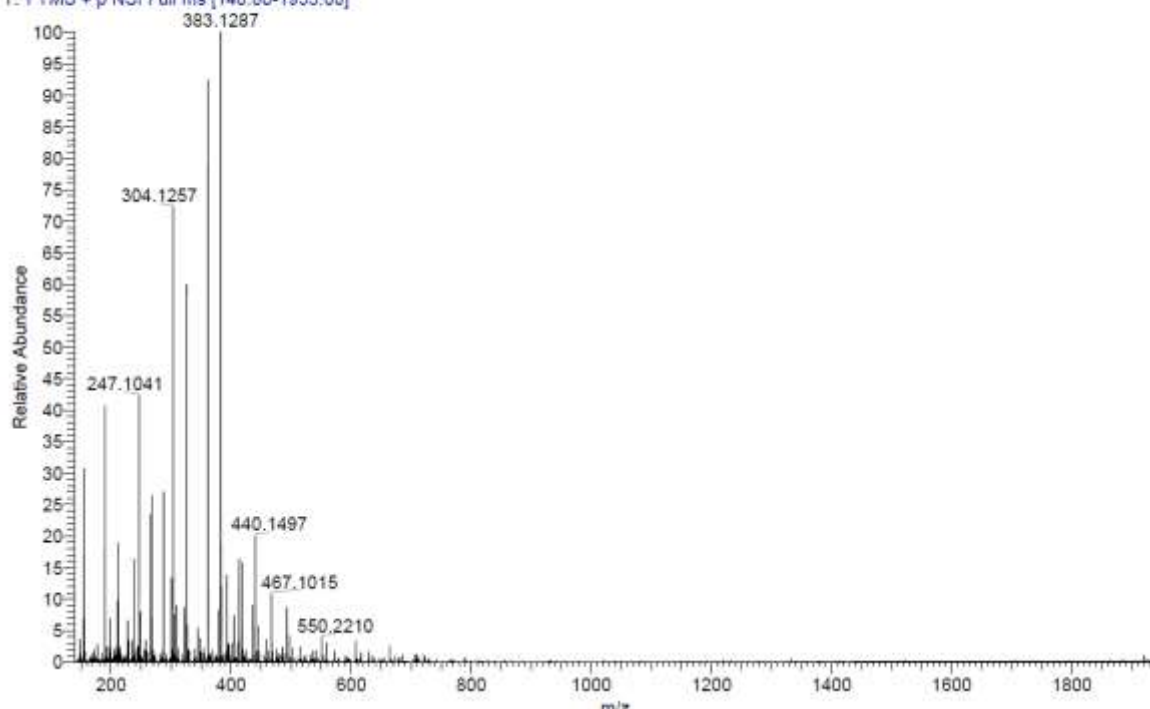

Supplementary Figure 29: Direct Infusion MS analysis of a typical APS reaction.

APS-463 MW=?  
(H<sub>2</sub>O)<sub>2</sub>H<sub>2</sub>O: MeOH 1:1+ 10% Formic Acid  
Glycine Oligomers: CH<sub>4</sub>N-(C<sub>2</sub>H<sub>3</sub>NO)<sub>n</sub>-CHO<sub>2</sub>

EPSRC National Facility Swansea  
LTO Orbitrap XL

Marc Rodriguez Garcia  
08/01/2015 08:35:27

GLACRO005-OA-HNESP-2 #28-45 RT: 0.65-1.05 AV: 16 SM: 7G NL: 1.24E6  
T: FTMS + p NSI Full ms [140.00-1935.00]

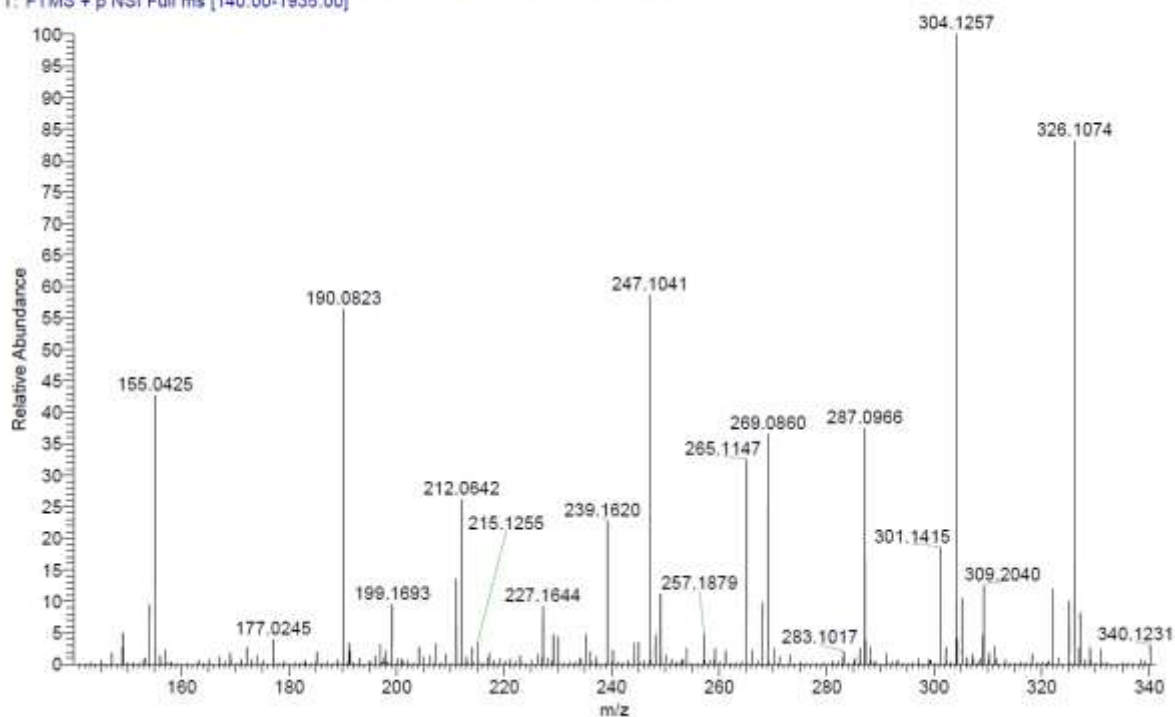

Supplementary Figure 30: Direct Infusion MS analysis of a typical APS reaction.

APS-463 MW=?  
(H<sub>2</sub>O)<sub>n</sub>H<sub>2</sub>O: MeOH 1:1+ 10% Formic Acid  
Glycine Oligomers: CH<sub>4</sub>N-(C<sub>2</sub>H<sub>3</sub>NO)<sub>n</sub>-CHO<sub>2</sub>  
GLACRO005-OA-HNESP-2 #28-45 RT: 0.65-1.05 AV: 16 SM: 7G NL: 1.71E6  
T: FTMS + p NSI Full ms [140.00-1935.00]

EPSRC National Facility Swansea  
LTQ Orbitrap XL

Marc Rodriguez Garcia  
08/01/2015 08:35:27

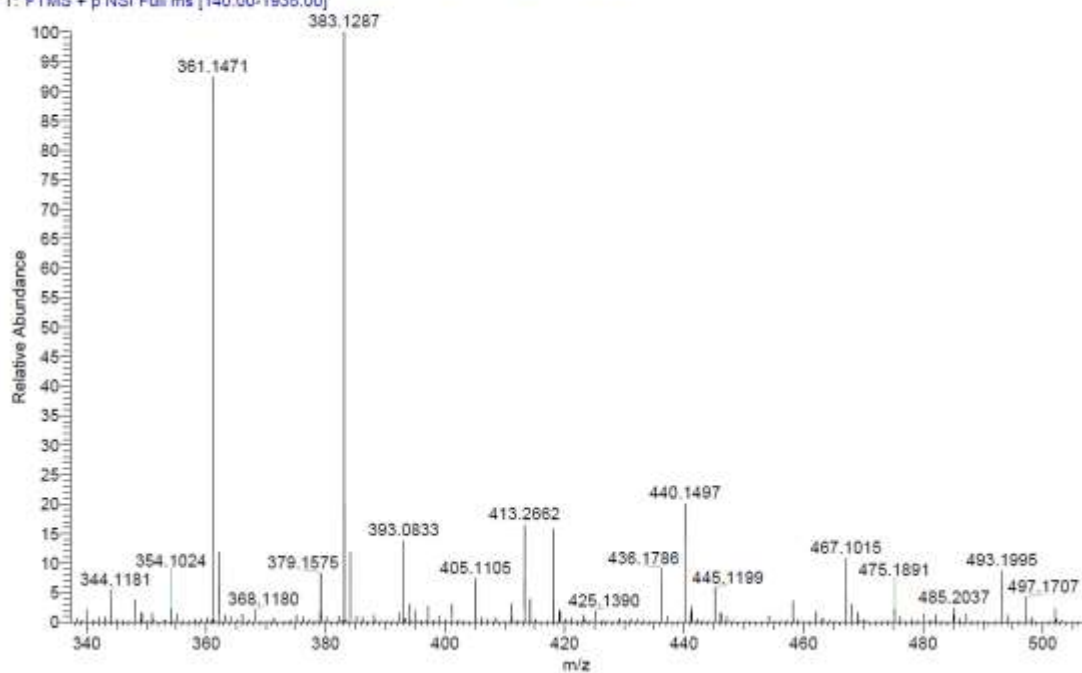

Supplementary Figure 31: Direct Infusion MS analysis of a typical APS reaction.

APS-463 MW=?  
(H<sub>2</sub>O)<sub>n</sub>H<sub>2</sub>O: MeOH 1:1+ 10% Formic Acid  
Glycine Oligomers: CH<sub>4</sub>N-(C<sub>2</sub>H<sub>3</sub>NO)<sub>n</sub>-CHO<sub>2</sub>  
GLACRO005-OA-HNESP-2 #28-45 RT: 0.65-1.05 AV: 16 SM: 7G NL: 1.49E5  
T: FTMS + p NSI Full ms [140.00-1935.00]

EPSRC National Facility Swansea  
LTQ Orbitrap XL

Marc Rodriguez Garcia  
08/01/2015 08:35:27

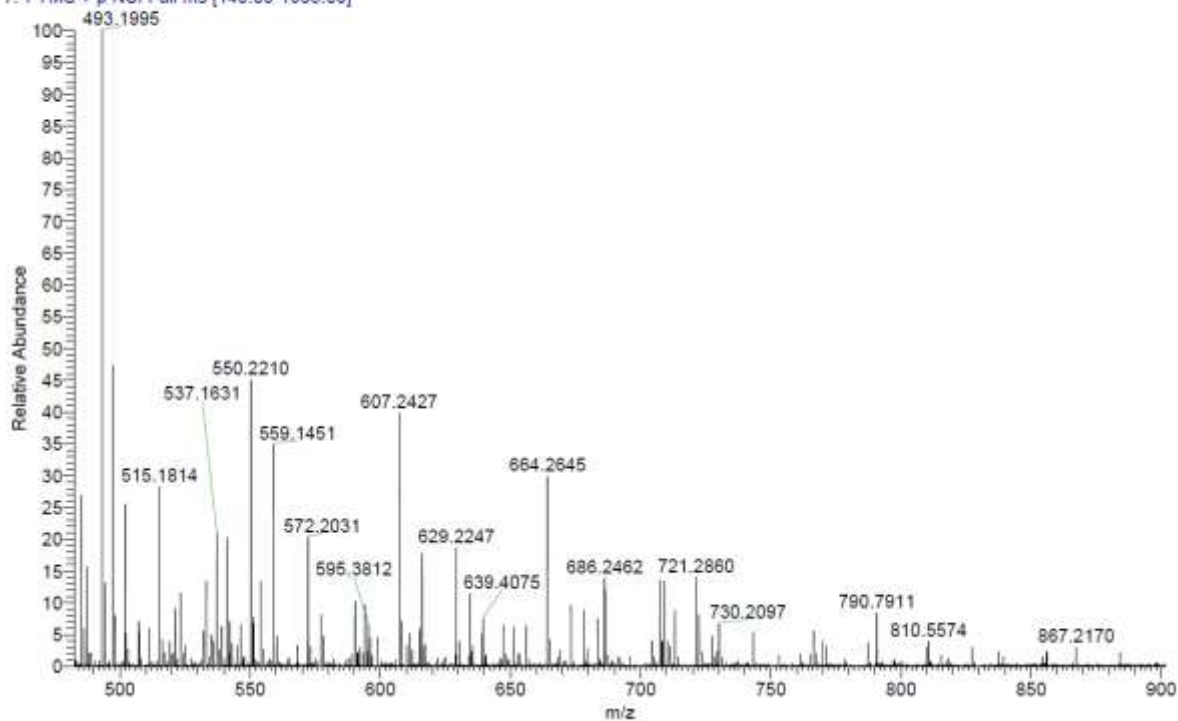

Supplementary Figure 32: Direct Infusion MS analysis of a typical APS reaction.

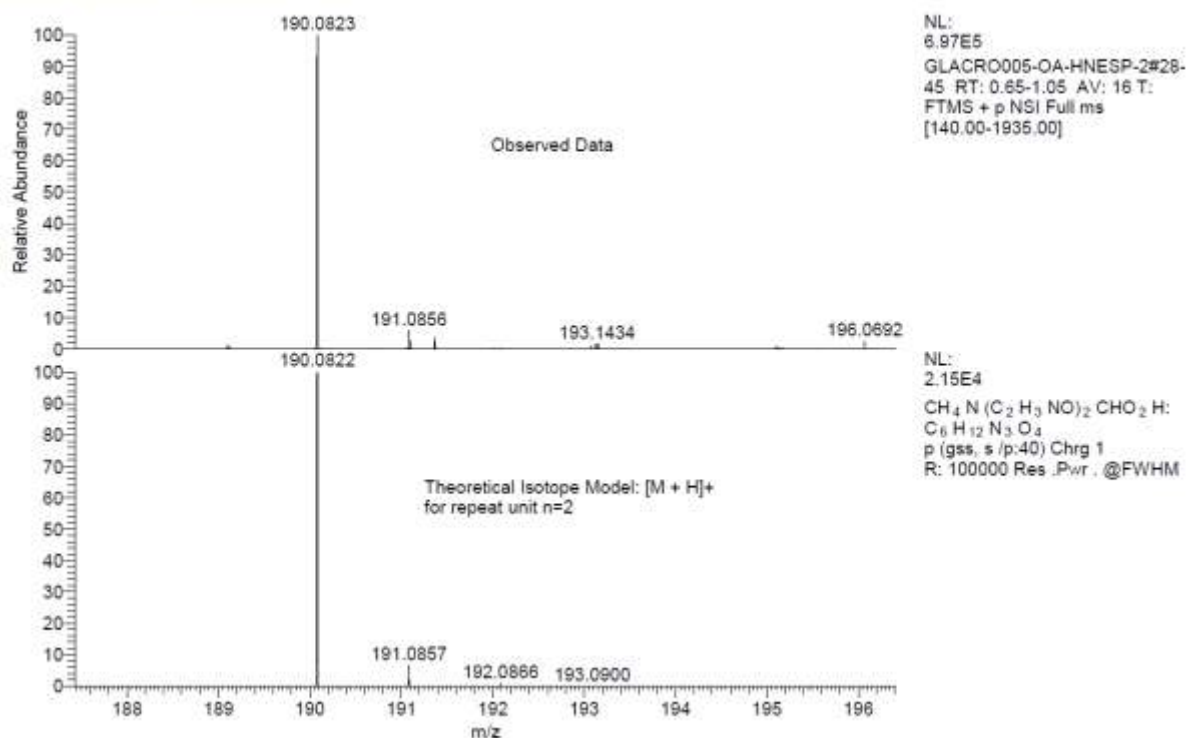

Supplementary Figure 33: Direct Infusion MS analysis of a typical APS reaction.

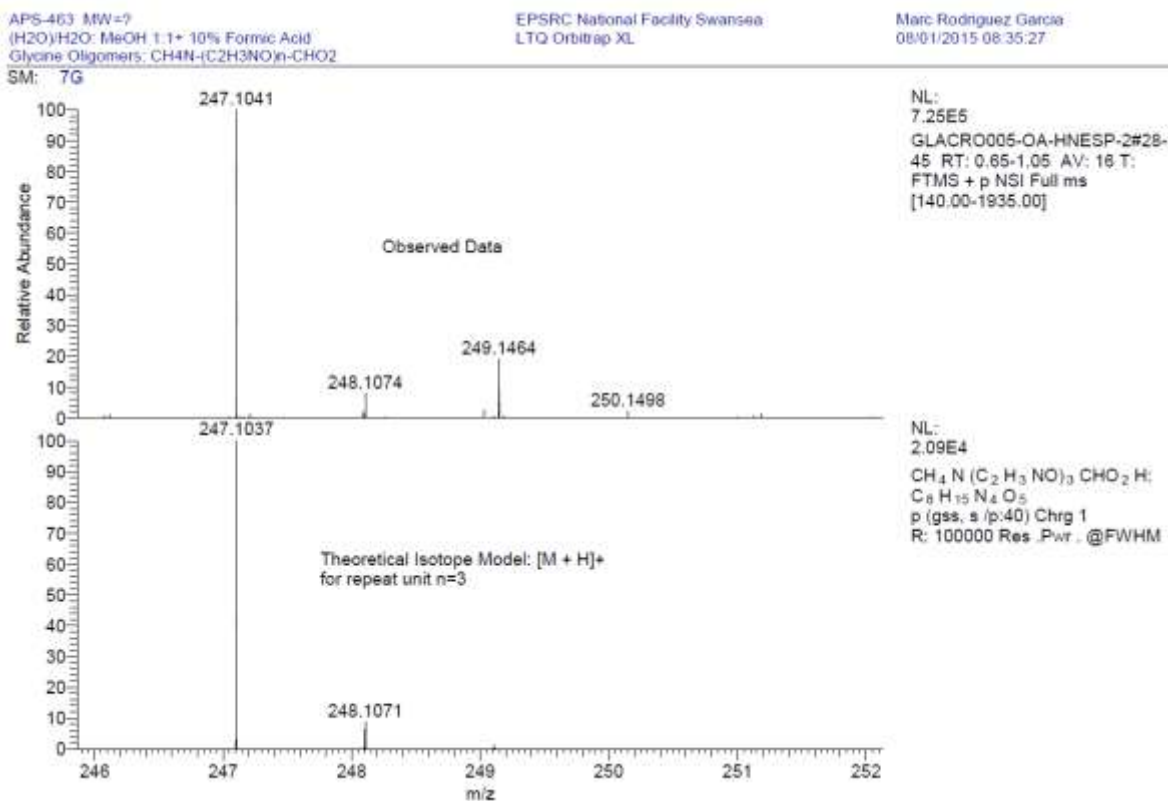

Supplementary Figure 34: Direct Infusion MS analysis of a typical APS reaction.



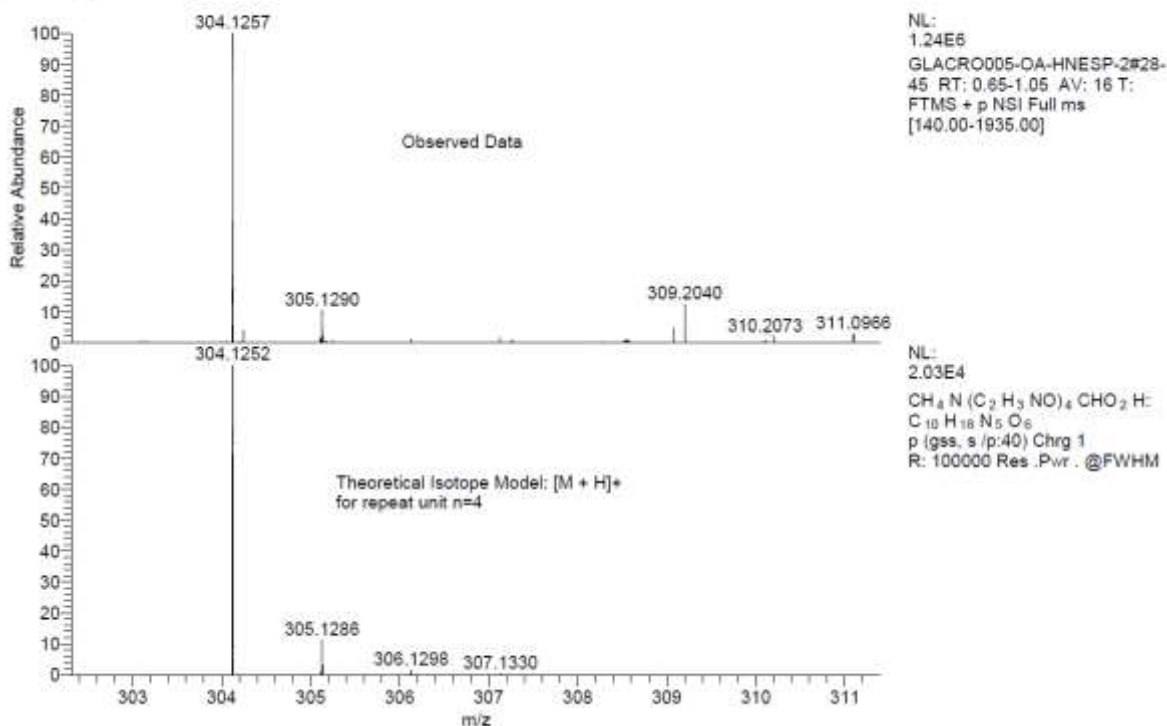

Supplementary Figure 35: Direct Infusion MS analysis of a typical APS reaction.

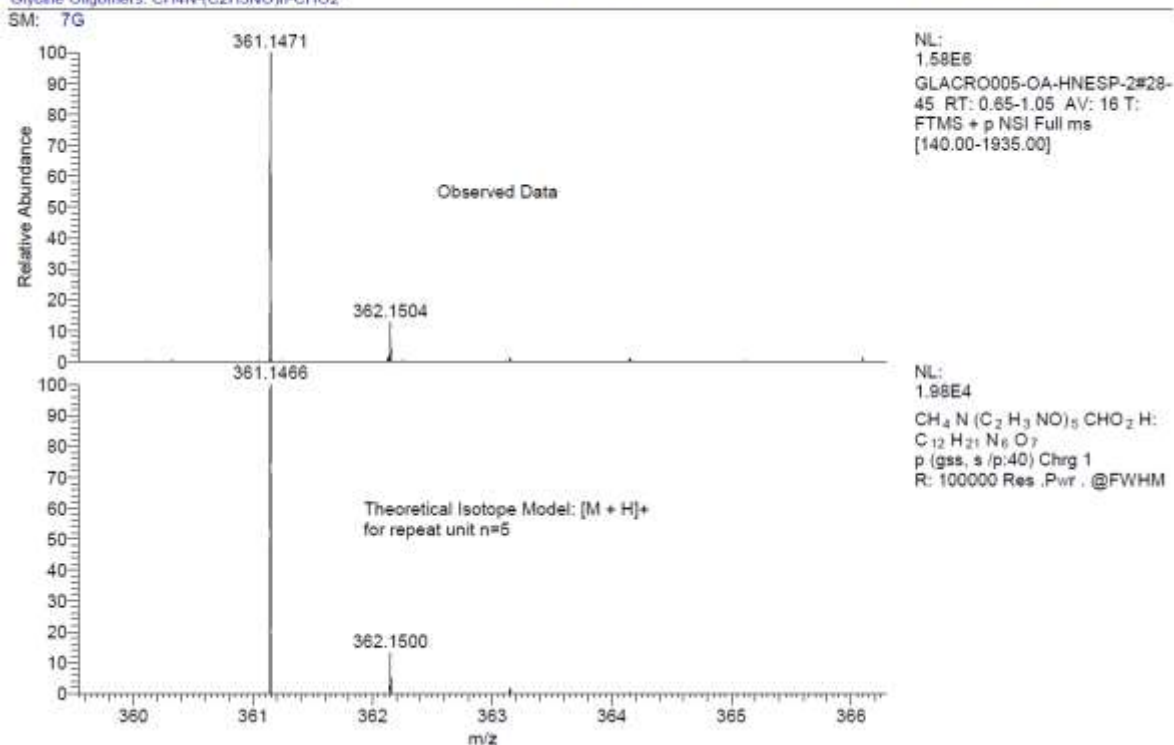

Supplementary Figure 36: Direct Infusion MS analysis of a typical APS reaction.

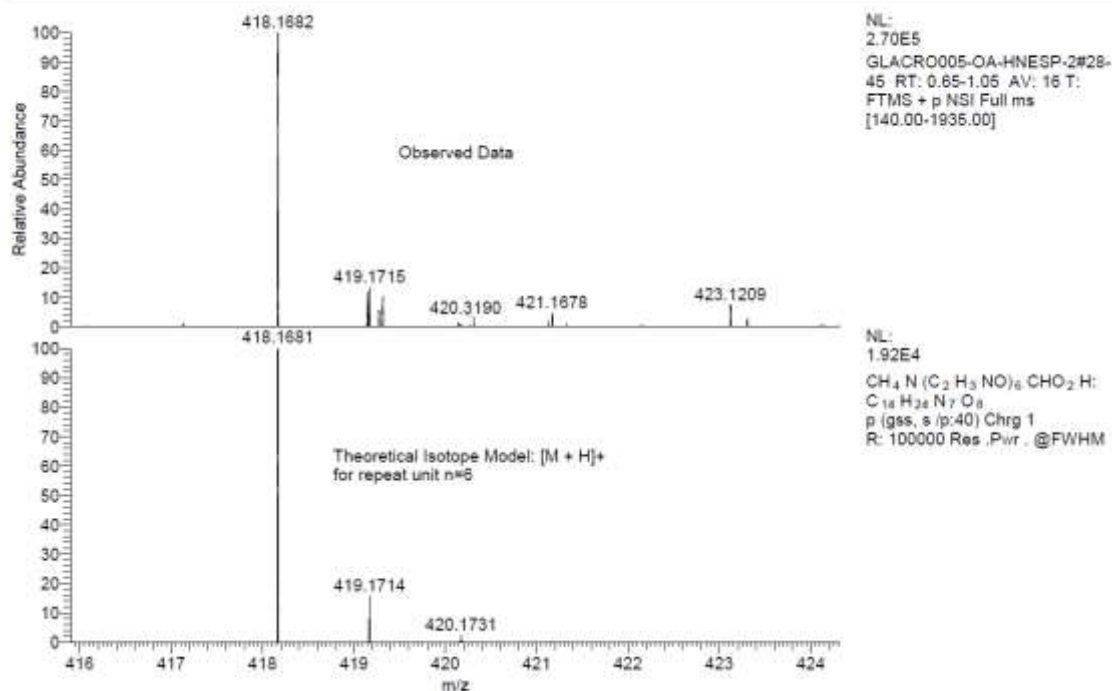

Supplementary Figure 37: Direct Infusion MS analysis of a typical APS reaction.

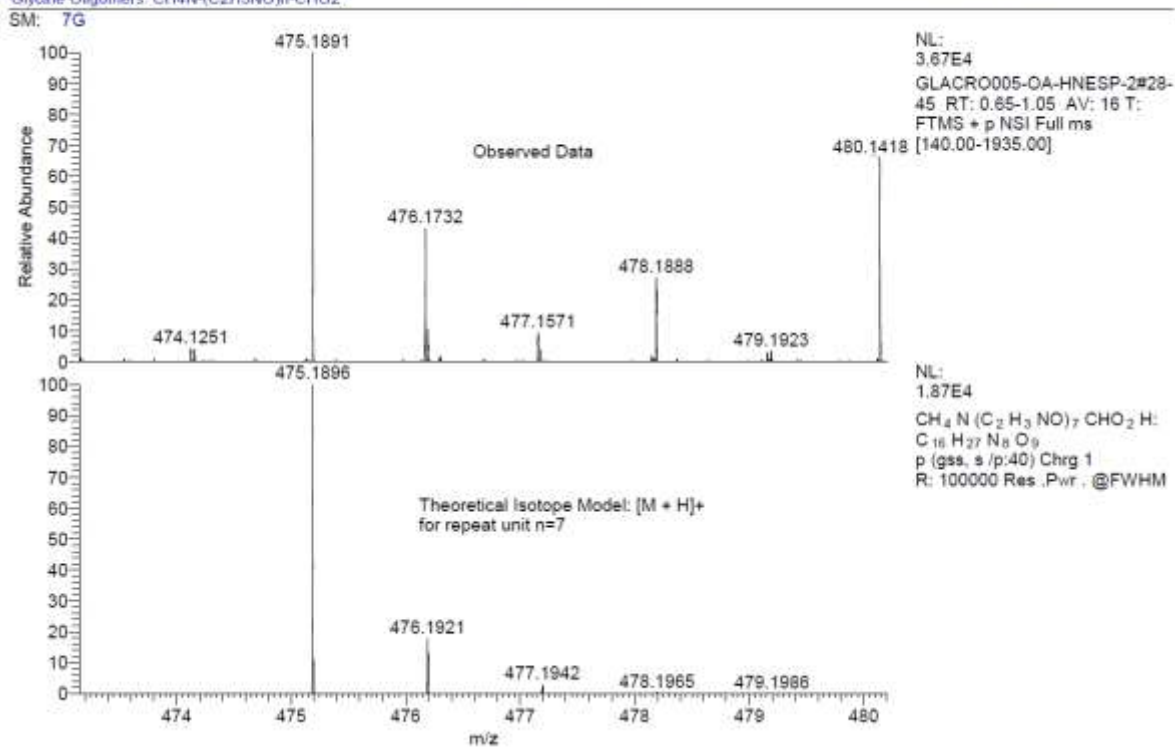

Supplementary Figure 38: Direct Infusion MS analysis of a typical APS reaction.

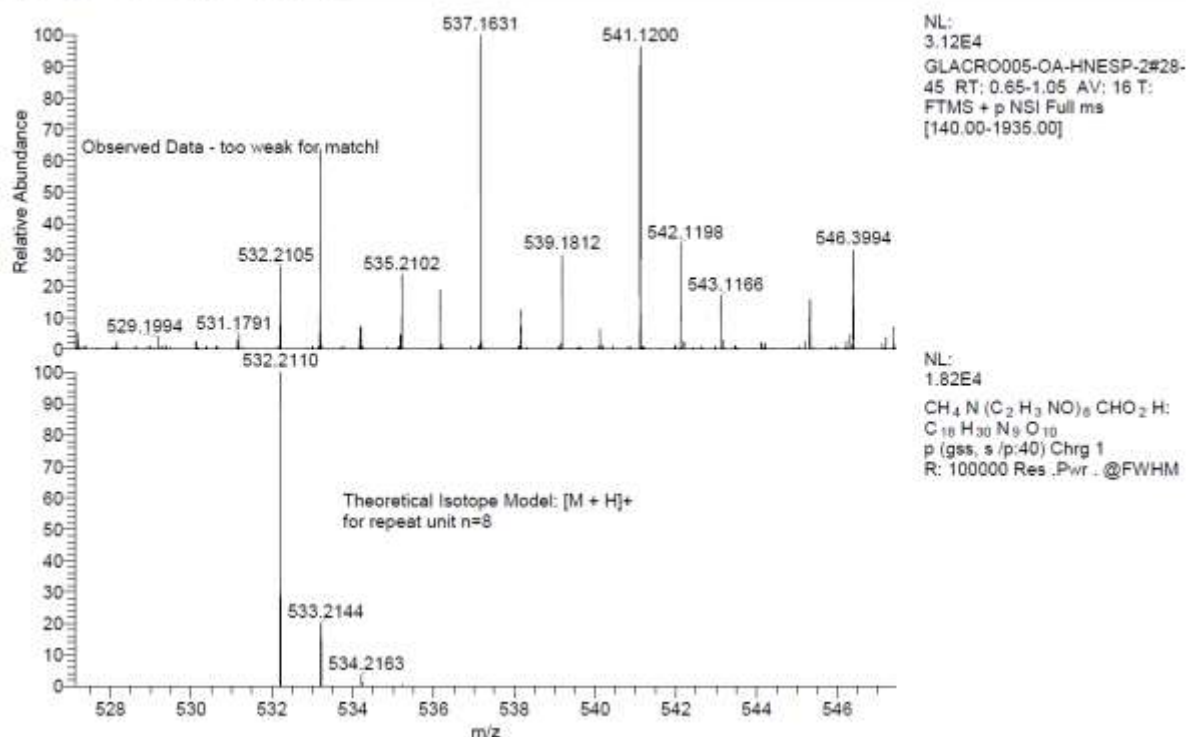

Supplementary Figure 39: Direct Infusion MS analysis of a typical APS reaction.

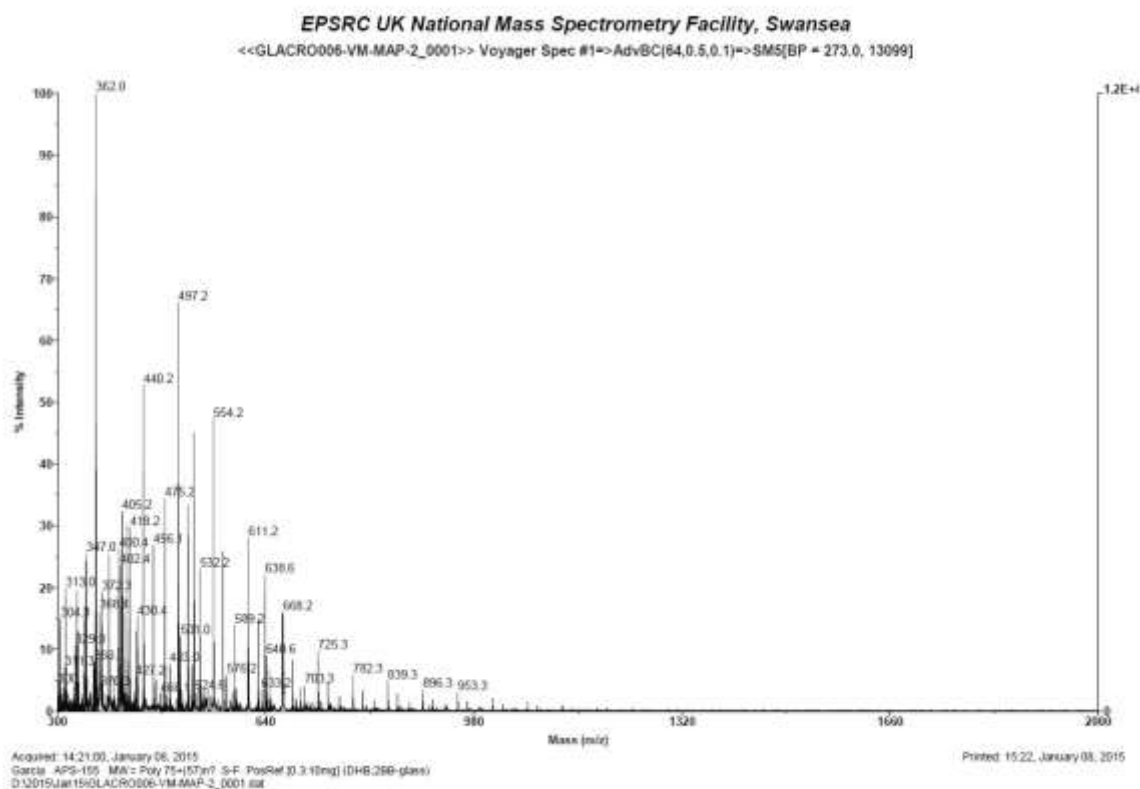

**Supplementary Figure 40:** MALDI-TOF analysis of a solid fraction

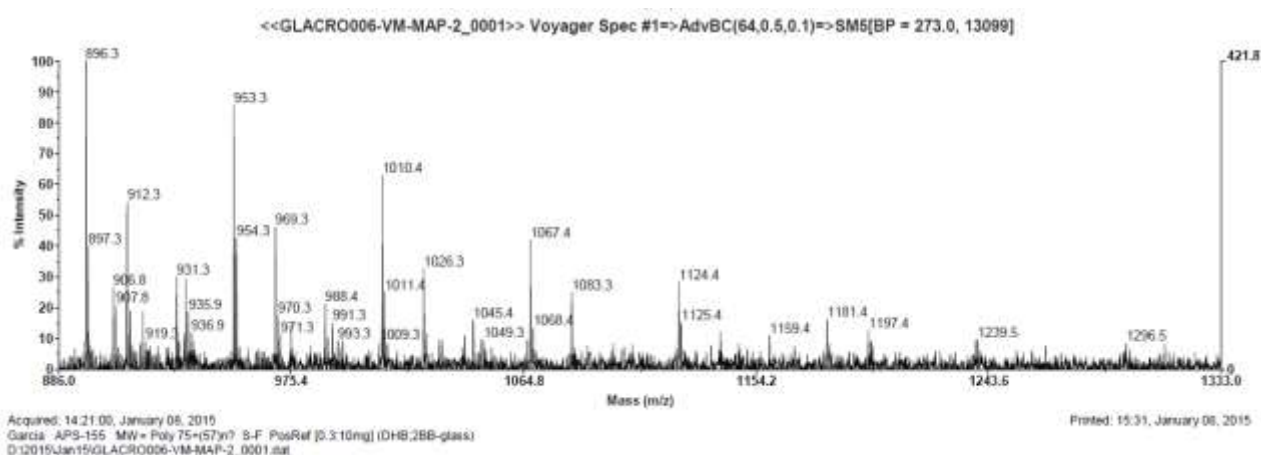

**Supplementary Figure 41:** MALDI-TOF analysis of a solid fraction (zoom in high mass region). Note peak at 1181.4, corresponding to  $[C_{40}H_{62}N_{20}O_{21}Na]^+$ , the composition of the sodium ESI adduct of  $(Gly)_{20}$ .

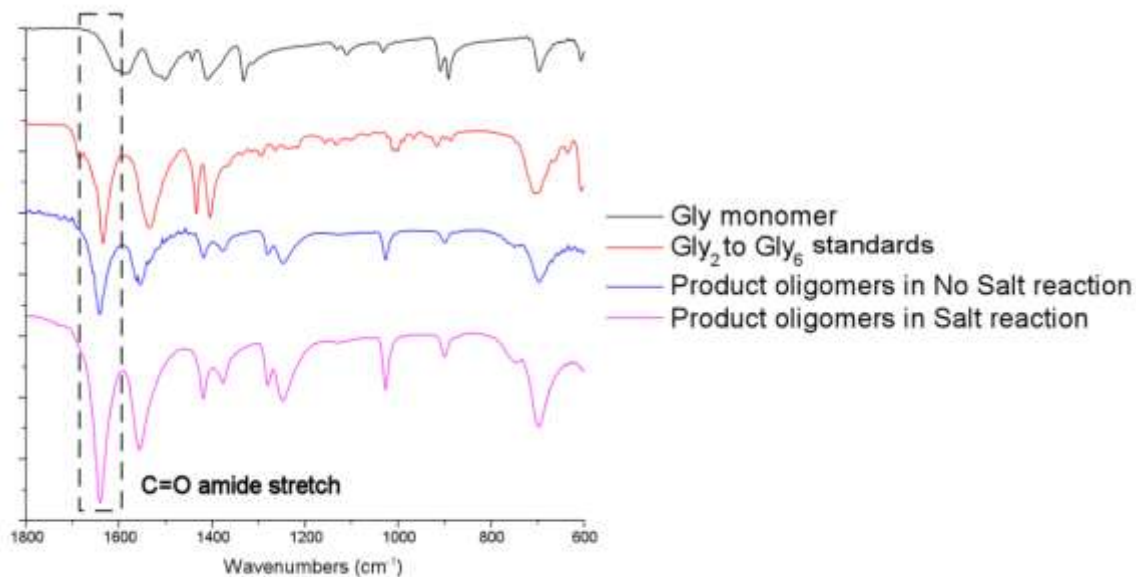

**Supplementary Figure 42:** C=O amide stretching IR band of glycine monomer, gly<sub>2</sub>-gly<sub>6</sub> standard oligomers, and two product oligomer samples run with different NaCl concentrations. As can be seen the IR of our samples indeed matches the oligomers which confirms our HPLC results.

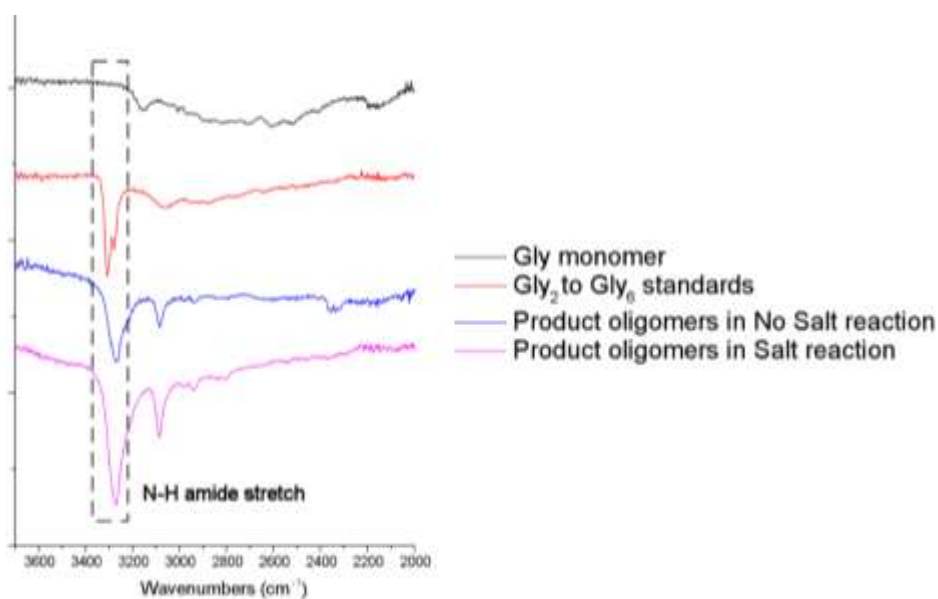

**Supplementary Figure 43:** N-H amide stretching IR band of glycine monomer, gly<sub>2</sub>-gly<sub>6</sub> standard oligomers, and two product oligomer samples run with different NaCl concentrations. As can be seen the IR of our samples indeed matches the oligomers which confirms our HPLC results.

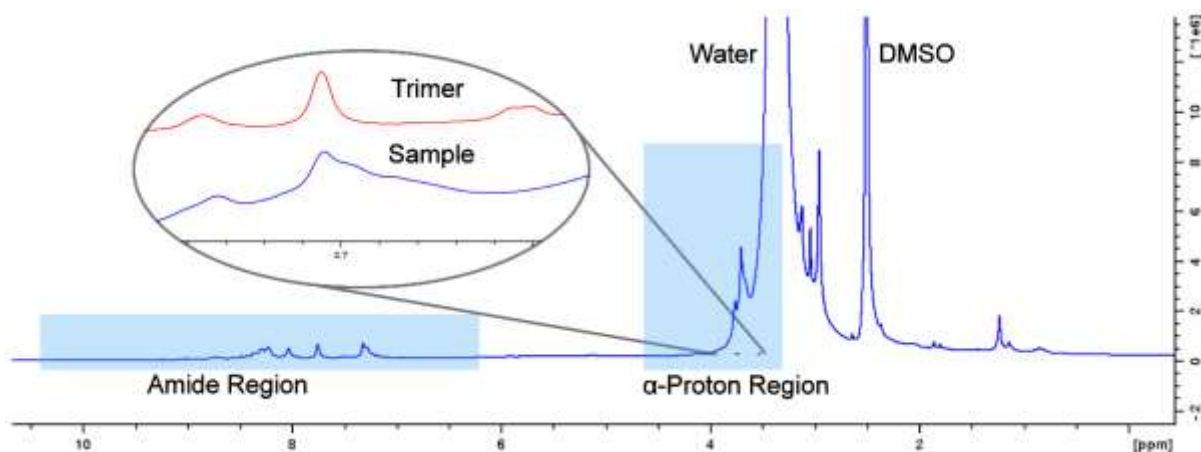

**Supplementary Figure 44:** <sup>1</sup>H-NMR spectrum of APS products in DMSO highlighting amide and α-proton regions.

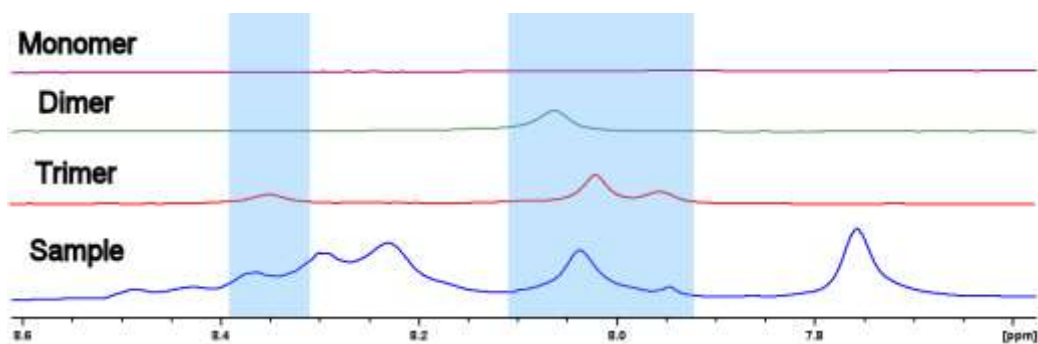

**Supplementary Figure 45:** <sup>1</sup>H-NMR comparison of Gly, Gly<sub>2</sub>, Gly<sub>3</sub> and the APS sample in the amide region.

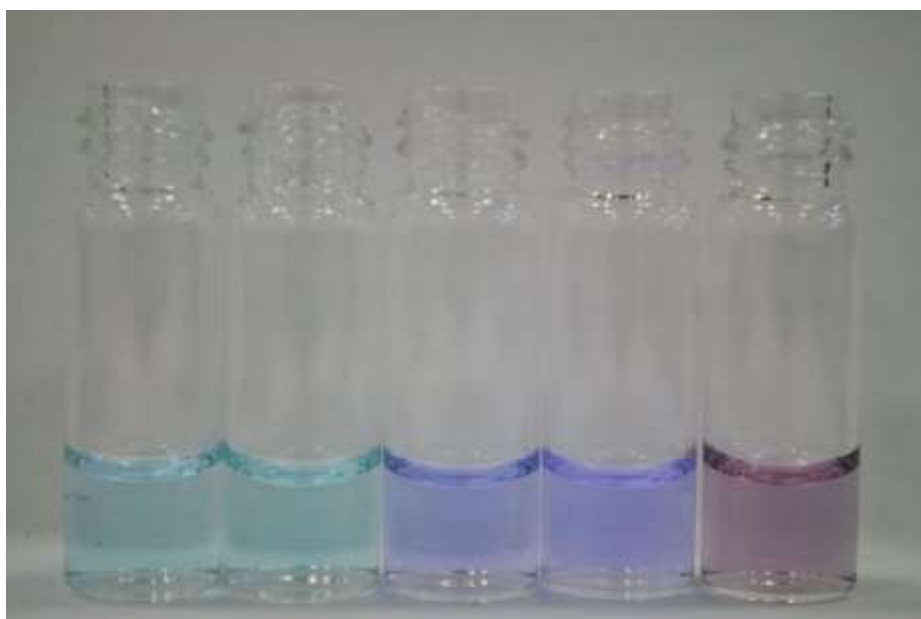

**Supplementary Figure 46:** Biuret tests for Gly, Gly<sub>2</sub>, Gly<sub>3</sub> & material from the APS after 1 and 3 dehydration cycles.



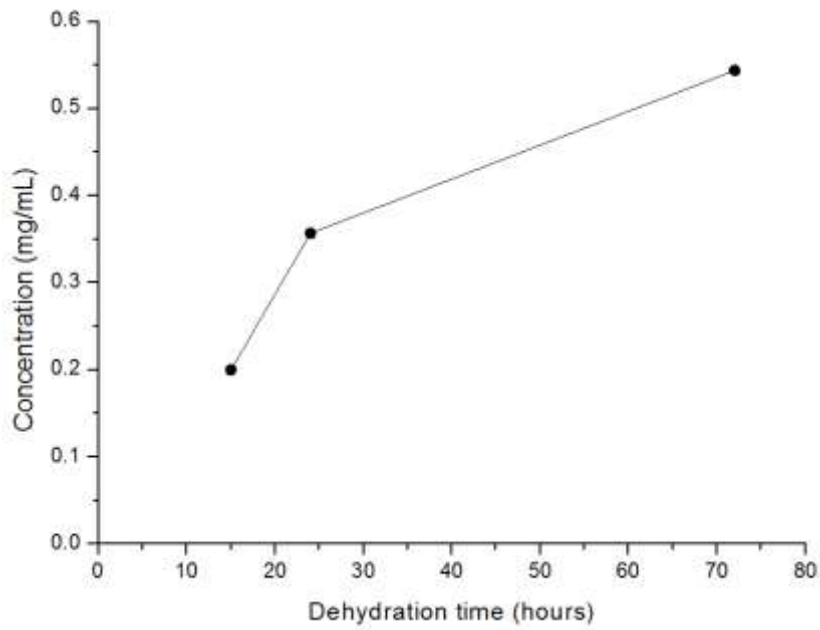

**Supplementary Figure 47:** Concentration of peptidic material in APS samples after different dehydration times based on Biuret assay.

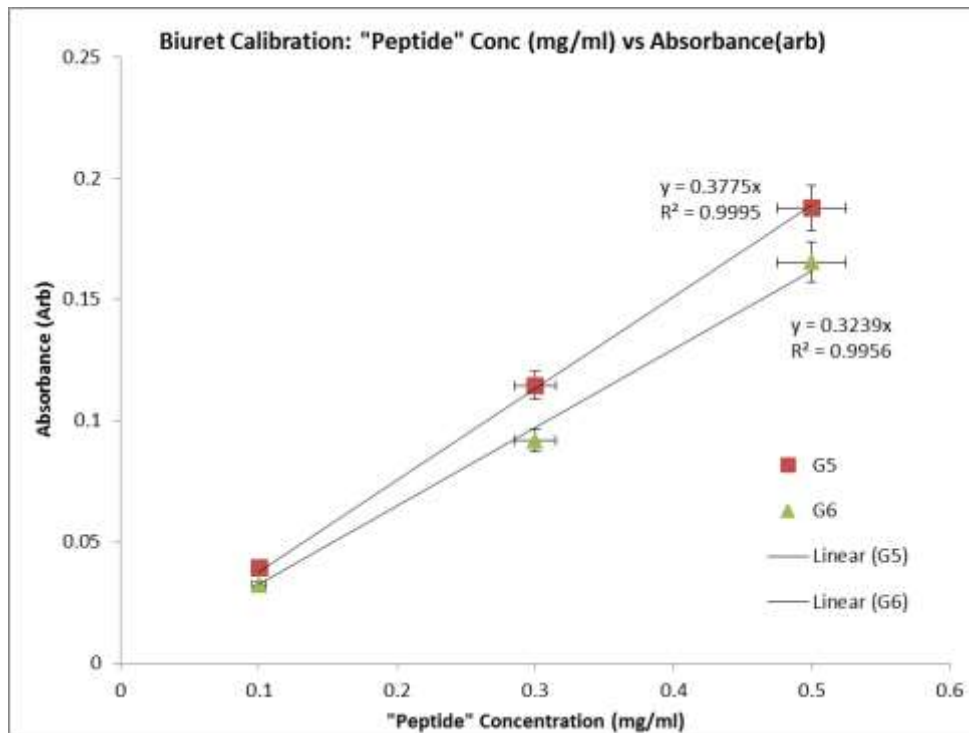

**Supplementary Figure 48:** Biuret calibration using known concentrations of both Gly<sub>5</sub> and Gly<sub>6</sub>.

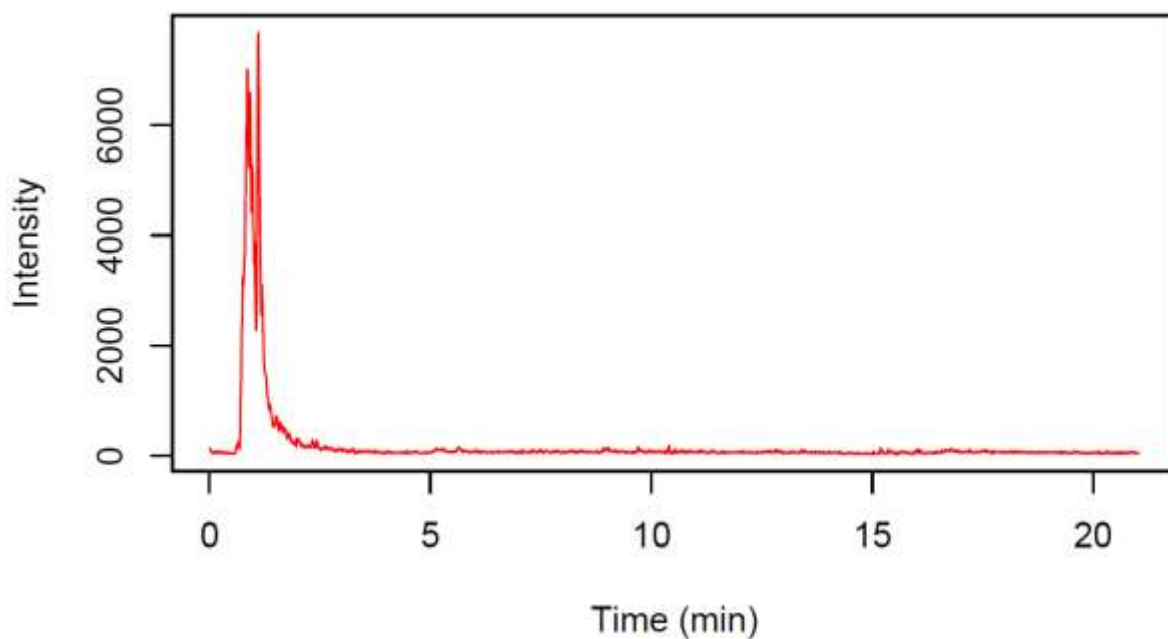

**Supplementary Figure 49:** “Virtual” BPC traces illustrating co-condensation of G and A monomers. VBPC is constructed from the EICs observed for a list of putative oligomers incorporating both of the amino acids monomers.

| Experimental Product ion m/z | Possible parent sequence(s) at m/z=363.115 | Possible production sequence(s) | Fragment type | MSMS m/z | Error  |
|------------------------------|--------------------------------------------|---------------------------------|---------------|----------|--------|
| 90.054                       | GGAA                                       | A                               | [y1]1+        | 90.055   | -0.001 |
| 90.054                       | GAGA                                       | A                               | [y1]1+        | 90.055   | -0.001 |
| 90.054                       | AGGA                                       | A                               | [y1]1+        | 90.055   | -0.001 |
| 115.05                       | GGAA                                       | GG                              | [b2]1+        | 115.05   | 0      |
| 129.0656                     | GAGA                                       | GA                              | [b2]1+        | 129.066  | 0      |
| 129.0656                     | GAAG                                       | GA                              | [b2]1+        | 129.066  | 0      |
| 129.0656                     | AGGA                                       | AG                              | [b2]1+        | 129.066  | 0      |
| 129.0656                     | AGAG                                       | AG                              | [b2]1+        | 129.066  | 0      |
| 133.0613                     | AAGG                                       | GG                              | [y2]1+        | 133.061  | 0      |
| 147.0752                     | GAGA                                       | GA                              | [y2]1+        | 147.076  | -0.001 |
| 147.0752                     | GAAG                                       | AG                              | [y2]1+        | 147.076  | -0.001 |
| 147.0752                     | AGGA                                       | GA                              | [y2]1+        | 147.076  | -0.001 |
| 147.0752                     | AGAG                                       | AG                              | [y2]1+        | 147.076  | -0.001 |
| 186.0859                     | GGAA                                       | GGA                             | [b3]1+        | 186.087  | -0.001 |
| 186.0859                     | GAGA                                       | GAG                             | [b3]1+        | 186.087  | -0.001 |
| 186.0859                     | AGGA                                       | AGG                             | [b3]1+        | 186.087  | -0.001 |
| 204.0965                     | AGGA                                       | GGA                             | [y3]1+        | 204.098  | -0.002 |
| 204.0965                     | AGAG                                       | GAG                             | [y3]1+        | 204.098  | -0.002 |
| 204.0965                     | AAGG                                       | AGG                             | [y3]1+        | 204.098  | -0.002 |

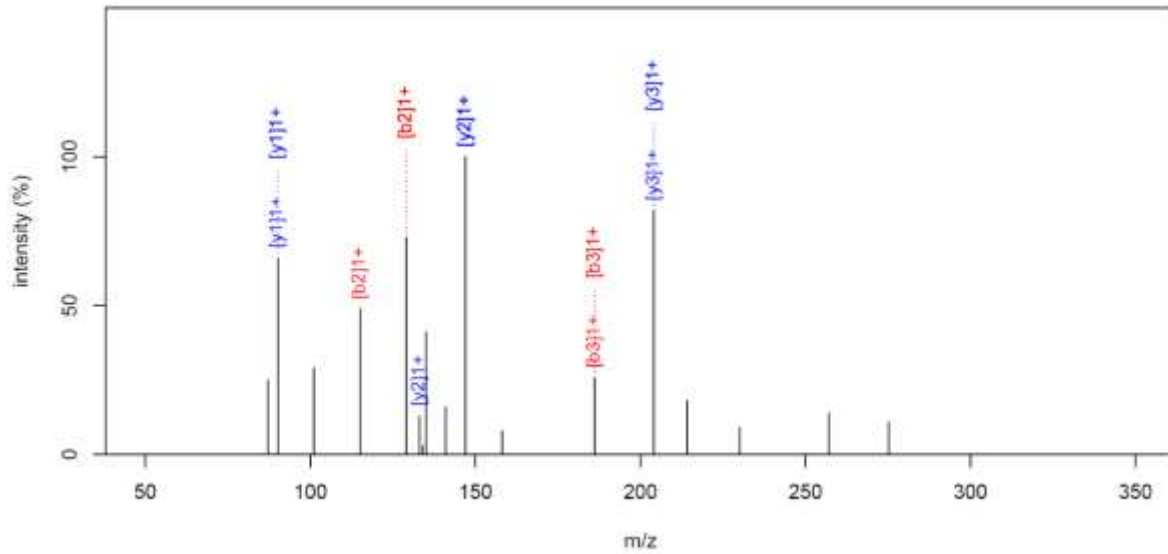

**Supplementary Figure 50:** Example MS/MS analyses of products of G and A monomer co-oligomerisation experiments. Spectrum (above) shows all the product ions resulting from MS/MS analysis of  $m/z = 275.135$  (corresponding to a tetramer incorporating 2 x G and 2x A). A series of fragments are observed which can be assigned as those expected (below) from a number of different possible sequences which might be expected from tetramers incorporating 2 x G and 2 x A (ie. more than one sequence of the same composition is present, all incorporating G and A).

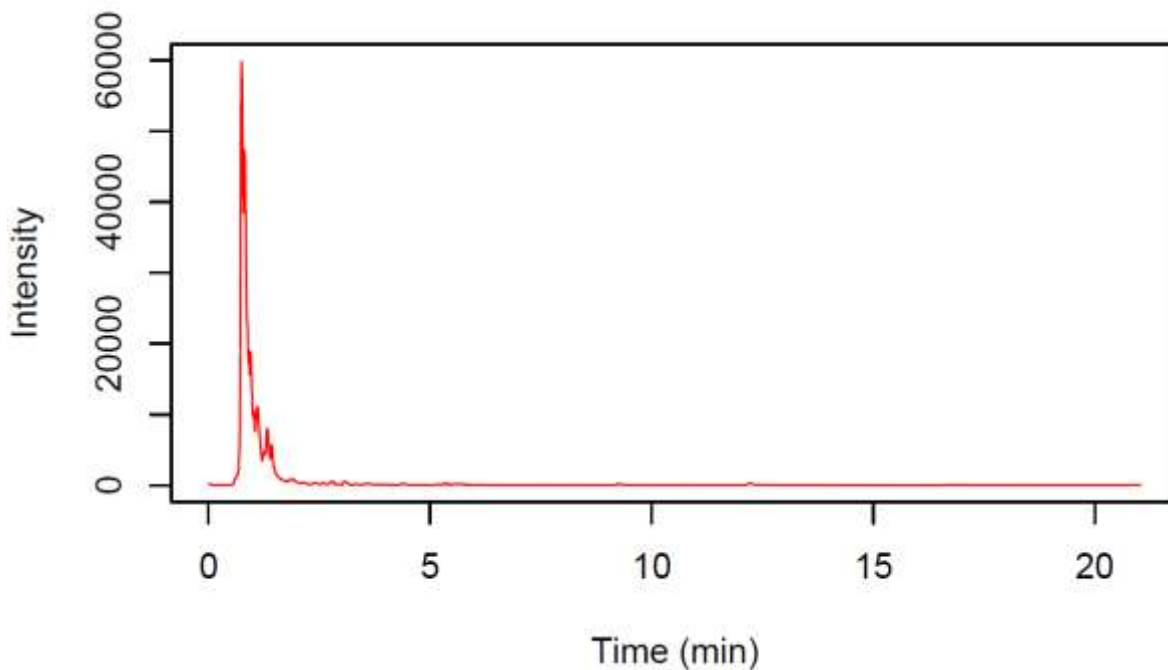

**Supplementary Figure 51:** “Virtual” BPC traces illustrating co-condensation of G and D monomers. VBPC is constructed from the EICs observed for a list of putative oligomers incorporating both of the amino acids monomers.

| Experimental Product ion m/z | Possible parent sequence(s) at m/z=363.115 | Possible production sequence(s) | Fragment type | MSMS m/z | Error  |
|------------------------------|--------------------------------------------|---------------------------------|---------------|----------|--------|
| 76.0327                      | GDDG                                       | G                               | [y1]1+        | 76.039   | -0.006 |
| 76.0327                      | DGDDG                                      | G                               | [y1]1+        | 76.039   | -0.006 |
| 76.0327                      | DDGG                                       | G                               | [y1]1+        | 76.039   | -0.006 |
| 115.051                      | GGDD                                       | GG                              | [b2]1+        | 115.05   | 0.001  |
| 173.0516                     | GDGD                                       | GD                              | [b2]1+        | 173.056  | -0.004 |
| 173.0516                     | GDDG                                       | GD                              | [b2]1+        | 173.056  | -0.004 |
| 173.0516                     | DGGD                                       | DG                              | [b2]1+        | 173.056  | -0.004 |
| 173.0516                     | DGDDG                                      | DG                              | [b2]1+        | 173.056  | -0.004 |
| 191.0673                     | GDGD                                       | GD                              | [y2]1+        | 191.066  | 0.001  |
| 191.0673                     | GDDG                                       | DG                              | [y2]1+        | 191.066  | 0.001  |
| 191.0673                     | DGGD                                       | GD                              | [y2]1+        | 191.066  | 0.001  |
| 191.0673                     | DGDDG                                      | DG                              | [y2]1+        | 191.066  | 0.001  |
| 230.0741                     | GGDD                                       | GGD                             | [b3]1+        | 230.077  | -0.003 |
| 230.0741                     | GDGD                                       | GDG                             | [b3]1+        | 230.077  | -0.003 |
| 230.0741                     | DGGD                                       | DGG                             | [b3]1+        | 230.077  | -0.003 |
| 231.0617                     | DDGG                                       | DD                              | [b2]1+        | 231.061  | 0.001  |
| 248.0845                     | DGGD                                       | GGD                             | [y3]1+        | 248.088  | -0.004 |
| 248.0845                     | DGDDG                                      | GDG                             | [y3]1+        | 248.088  | -0.004 |
| 248.0845                     | DDGG                                       | DGG                             | [y3]1+        | 248.088  | -0.004 |
| 249.0646                     | GGDD                                       | DD                              | [y2]1+        | 249.072  | -0.007 |
| 288.077                      | GDDG                                       | GDD                             | [b3]1+        | 288.083  | -0.006 |
| 288.077                      | DGDDG                                      | DGD                             | [b3]1+        | 288.083  | -0.006 |
| 288.077                      | DDGG                                       | DDG                             | [b3]1+        | 288.083  | -0.006 |
| 306.091                      | GGDD                                       | GDD                             | [y3]1+        | 306.093  | -0.002 |
| 306.091                      | GDGD                                       | DGD                             | [y3]1+        | 306.093  | -0.002 |
| 306.091                      | GDDG                                       | DDG                             | [y3]1+        | 306.093  | -0.002 |

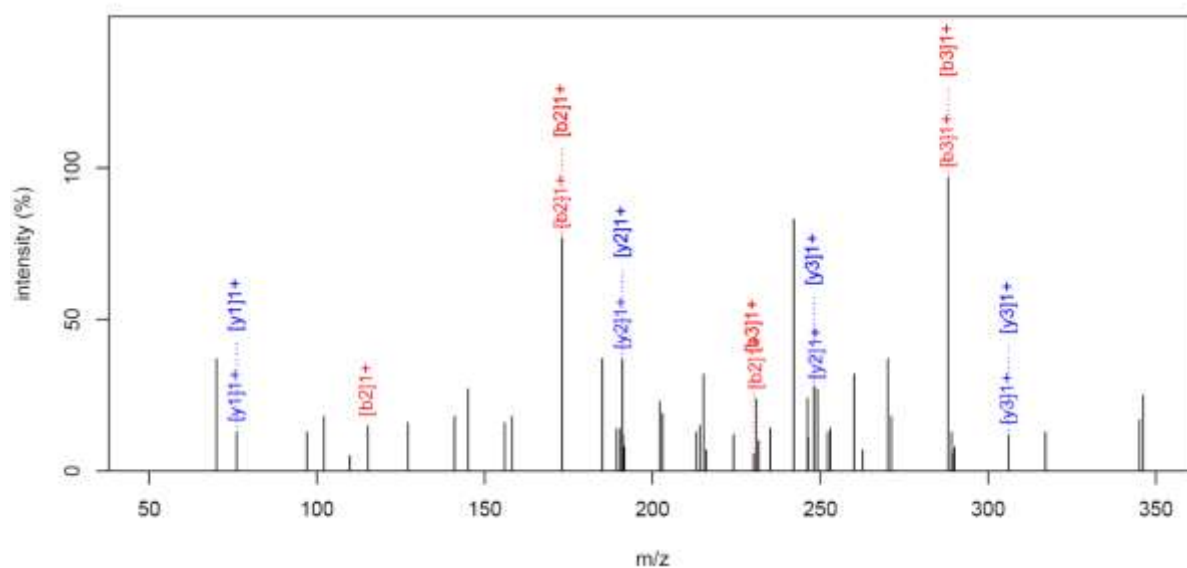

**Supplementary Figure 52:** Example MS/MS analyses of products of G and D monomer co-oligomerisation experiments. Spectrum (above) shows all the product ions resulting from MS/MS analysis of  $m/z = 363.115$  (corresponding to a tetramer incorporating 2 x G and 2 x D). A series of fragments are observed which can be assigned as those expected (below) from a number of different possible sequences which might be expected from tetramers incorporating 2 x G and 2 x D (ie. more than one sequence of the same composition is present, all incorporating G and D).

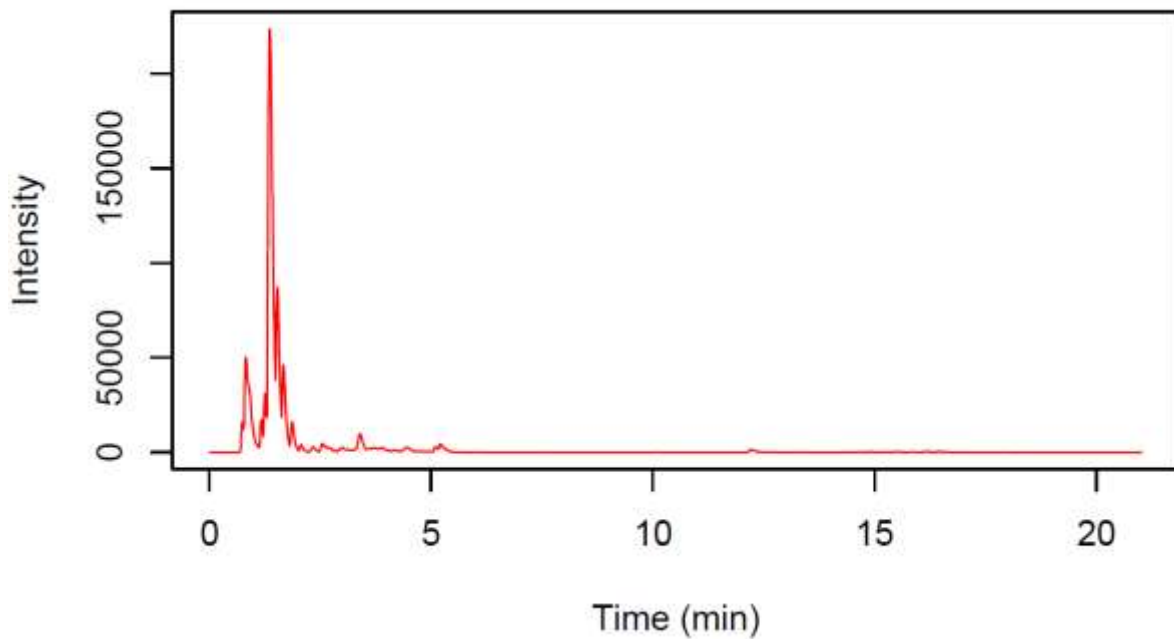

**Supplementary Figure 53:** “Virtual” BPC traces illustrating co-condensation of G and E monomers. VBPC is constructed from the EICs observed for a list of putative oligomers incorporating both of the amino acids monomers.

| Experimental Product ion m/z | Possible parent sequence(s) at m/z=363.115 | Possible production sequence(s) | Fragment type | MSMS m/z | Error  |
|------------------------------|--------------------------------------------|---------------------------------|---------------|----------|--------|
| 130.0536                     | EGGE                                       | E                               | [b1]1+        | 130.05   | 0.004  |
| 130.0536                     | EGEG                                       | E                               | [b1]1+        | 130.05   | 0.004  |
| 130.0536                     | EEGG                                       | E                               | [b1]1+        | 130.05   | 0.004  |
| 187.0693                     | GEGE                                       | GE                              | [b2]1+        | 187.071  | -0.002 |
| 187.0693                     | GEEG                                       | GE                              | [b2]1+        | 187.071  | -0.002 |
| 187.0693                     | EGGE                                       | EG                              | [b2]1+        | 187.071  | -0.002 |
| 187.0693                     | EGEG                                       | EG                              | [b2]1+        | 187.071  | -0.002 |
| 205.0784                     | GEGE                                       | GE                              | [y2]1+        | 205.082  | -0.004 |
| 205.0784                     | GEEG                                       | EG                              | [y2]1+        | 205.082  | -0.004 |
| 205.0784                     | EGGE                                       | GE                              | [y2]1+        | 205.082  | -0.004 |
| 205.0784                     | EGEG                                       | EG                              | [y2]1+        | 205.082  | -0.004 |
| 244.1021                     | GGEE                                       | GGE                             | [b3]1+        | 244.093  | 0.009  |
| 244.1021                     | GEGE                                       | GEG                             | [b3]1+        | 244.093  | 0.009  |
| 244.1021                     | EGGE                                       | EGG                             | [b3]1+        | 244.093  | 0.009  |
| 259.0765                     | EEGG                                       | EE                              | [b2]1+        | 259.092  | -0.015 |
| 262.108                      | EGGE                                       | GGE                             | [y3]1+        | 262.103  | 0.005  |
| 262.108                      | EGEG                                       | GEG                             | [y3]1+        | 262.103  | 0.005  |
| 262.108                      | EEGG                                       | EGG                             | [y3]1+        | 262.103  | 0.005  |
| 316.0786                     | GEEG                                       | GEE                             | [b3]1+        | 316.114  | -0.035 |
| 316.0786                     | EGEG                                       | EGE                             | [b3]1+        | 316.114  | -0.035 |
| 316.0786                     | EEGG                                       | EEG                             | [b3]1+        | 316.114  | -0.035 |

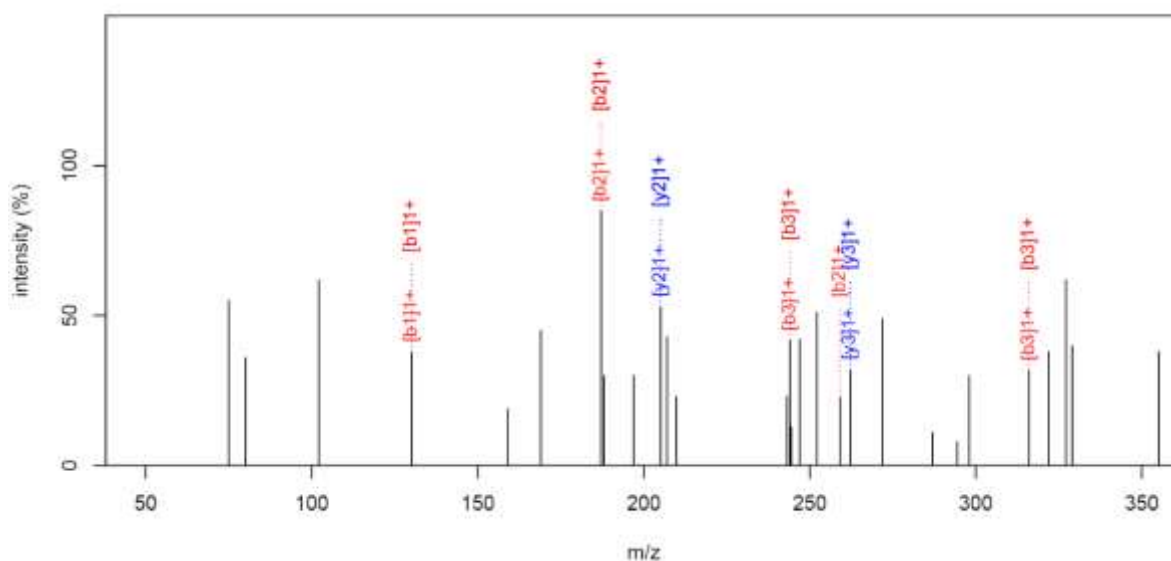

**Supplementary Figure 54:** Example MS/MS analyses of products of G and E monomer co-oligomerisation experiments. Spectrum (above) shows all the product ions resulting from MS/MS analysis of m/z = 391.146 (corresponding to a tetramer incorporating 2 x G and 2 x E). A series of fragments are observed which can be assigned as those expected (below) from a number of different possible sequences which might be expected from tetramers incorporating 2 x G and 2 x E (ie. more than one sequence of the same composition is present, all incorporating G and E).

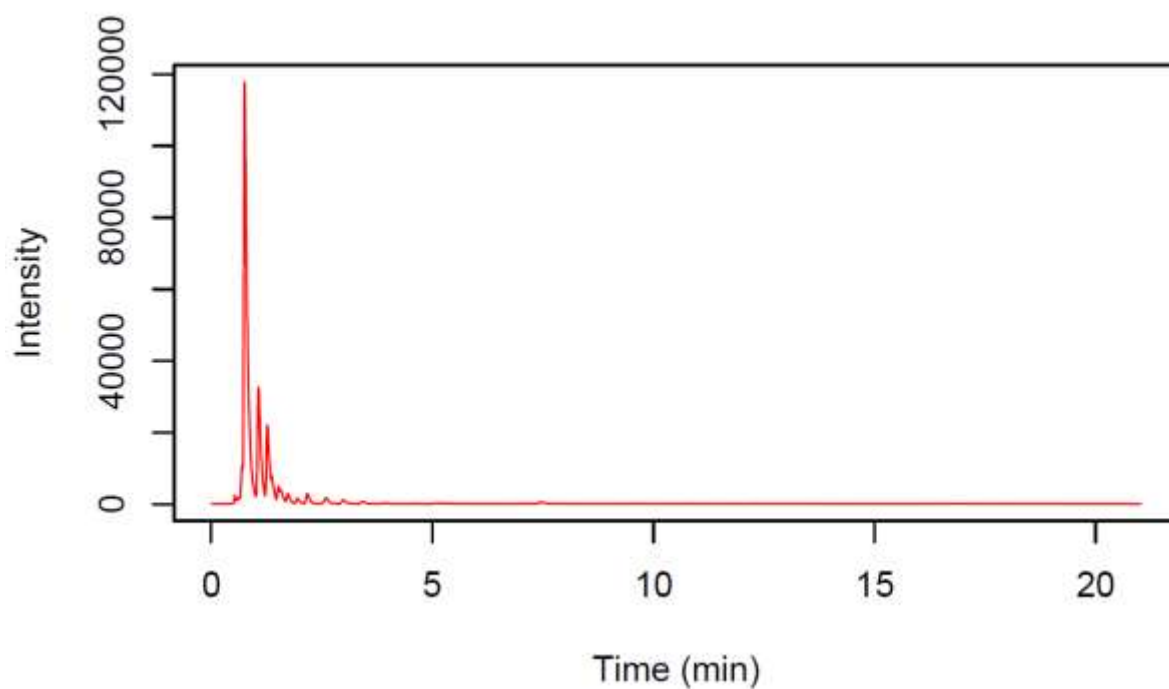

**Supplementary Figure 55:** “Virtual” BPC traces illustrating co-condensation of G and K monomers. VBPC is constructed from the EICs observed for a list of putative oligomers incorporating both of the amino acids monomers.

| Experimental Product ion m/z | Possible parent sequence(s) at m/z=363.115 | Possible production sequence(s) | Fragment type | MSMS m/z | Error  |
|------------------------------|--------------------------------------------|---------------------------------|---------------|----------|--------|
| 129.0966                     | KKGG                                       | K                               | [b1]1+        | 129.102  | -0.005 |
| 129.0966                     | KGKG                                       | K                               | [b1]1+        | 129.102  | -0.005 |
| 129.0966                     | KGGK                                       | K                               | [b1]1+        | 129.102  | -0.005 |
| 147.1163                     | KGGK                                       | K                               | [y1]1+        | 147.113  | 0.003  |
| 147.1163                     | GKGK                                       | K                               | [y1]1+        | 147.113  | 0.003  |
| 147.1163                     | GGKK                                       | K                               | [y1]1+        | 147.113  | 0.003  |
| 186.105                      | KGKG                                       | KG                              | [b2]1+        | 186.124  | -0.019 |
| 186.105                      | KGGK                                       | KG                              | [b2]1+        | 186.124  | -0.019 |
| 186.105                      | GKKG                                       | GK                              | [b2]1+        | 186.124  | -0.019 |
| 186.105                      | GKGK                                       | GK                              | [b2]1+        | 186.124  | -0.019 |
| 204.1326                     | KGKG                                       | KG                              | [y2]1+        | 204.134  | -0.001 |
| 204.1326                     | KGGK                                       | GK                              | [y2]1+        | 204.134  | -0.001 |
| 204.1326                     | GKKG                                       | KG                              | [y2]1+        | 204.134  | -0.001 |
| 204.1326                     | GKGK                                       | GK                              | [y2]1+        | 204.134  | -0.001 |
| 243.1491                     | KGGK                                       | KGG                             | [b3]1+        | 243.145  | 0.004  |
| 243.1491                     | GKGK                                       | GKG                             | [b3]1+        | 243.145  | 0.004  |
| 243.1491                     | GGKK                                       | GGK                             | [b3]1+        | 243.145  | 0.004  |
| 257.1957                     | KKGG                                       | KK                              | [b2]1+        | 257.197  | -0.001 |
| 261.1581                     | KKGG                                       | KGG                             | [y3]1+        | 261.156  | 0.002  |
| 261.1581                     | KGKG                                       | GKG                             | [y3]1+        | 261.156  | 0.002  |
| 261.1581                     | KGGK                                       | GGK                             | [y3]1+        | 261.156  | 0.002  |
| 275.2036                     | GGKK                                       | KK                              | [y2]1+        | 275.208  | -0.004 |
| 332.2238                     | GKKG                                       | KKG                             | [y3]1+        | 332.229  | -0.005 |
| 332.2238                     | GKGK                                       | KGK                             | [y3]1+        | 332.229  | -0.005 |
| 332.2238                     | GGKK                                       | GKK                             | [y3]1+        | 332.229  | -0.005 |

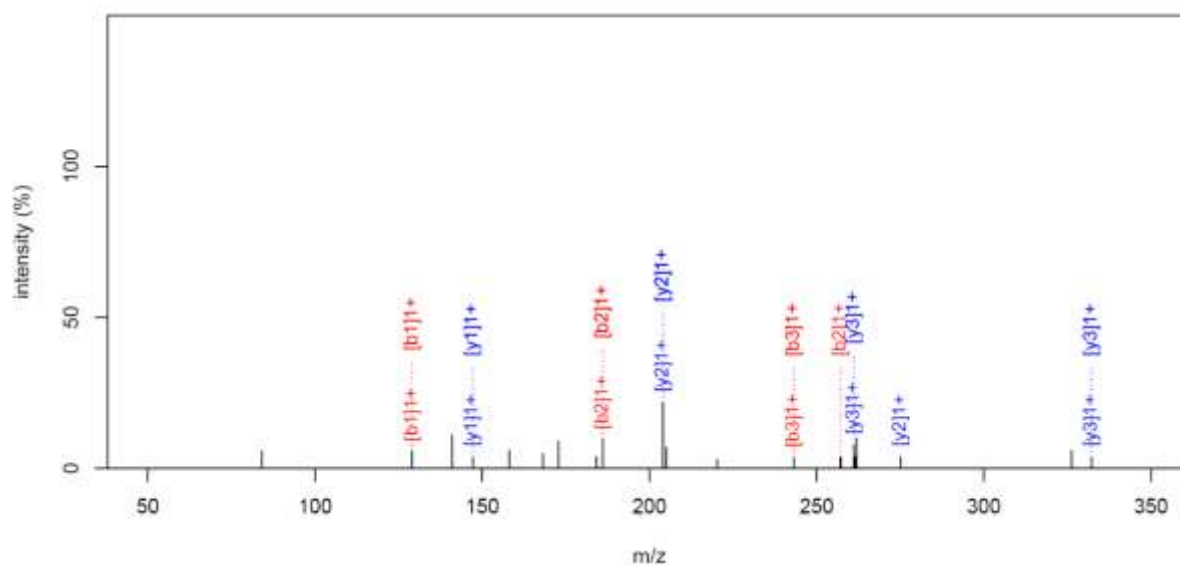

**Supplementary Figure 56:** Example MS/MS analyses of products of G and K monomer co-oligomerisation experiments. Spectrum (above) shows all the product ions resulting from MS/MS analysis of  $m/z = 389.251$  (corresponding to a tetramer incorporating 2 x G and 2 x K). A series of fragments are observed which can be assigned as those expected (below) from a number of different possible sequences which might be expected from tetramers incorporating 2 x G and 2 x K (ie. more than one sequence of the same composition is present, all incorporating G and K).



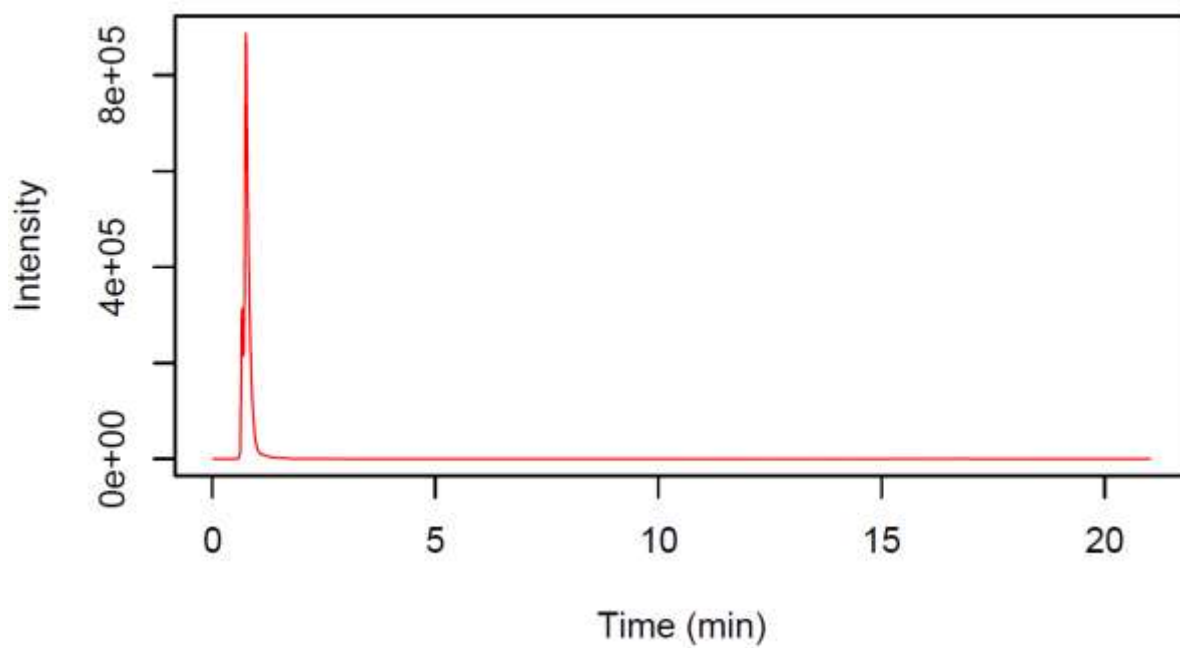

**Supplementary Figure 57:** “Virtual” BPC traces illustrating co-condensation of G and H monomers. VBPC is constructed from the EICs observed for a list of putative oligomers incorporating both of the amino acids monomers.

| Experimental Product ion m/z | Possible parent sequence(s) at m/z=363.115 | Possible production sequence(s) | Fragment type | MSMS m/z | Error  |
|------------------------------|--------------------------------------------|---------------------------------|---------------|----------|--------|
| 156.0753                     | HGGH                                       | H                               | [y1]1+        | 156.077  | -0.002 |
| 156.0753                     | GHGH                                       | H                               | [y1]1+        | 156.077  | -0.002 |
| 156.0753                     | GGHH                                       | H                               | [y1]1+        | 156.077  | -0.002 |
| 195.0851                     | HGHG                                       | HG                              | [b2]1+        | 195.088  | -0.003 |
| 195.0851                     | HGGH                                       | HG                              | [b2]1+        | 195.088  | -0.003 |
| 195.0851                     | GHHG                                       | GH                              | [b2]1+        | 195.088  | -0.003 |
| 195.0851                     | GHGH                                       | GH                              | [b2]1+        | 195.088  | -0.003 |
| 213.095                      | HGHG                                       | HG                              | [y2]1+        | 213.098  | -0.003 |
| 213.095                      | HGGH                                       | GH                              | [y2]1+        | 213.098  | -0.003 |
| 213.095                      | GHHG                                       | HG                              | [y2]1+        | 213.098  | -0.003 |
| 213.095                      | GHGH                                       | GH                              | [y2]1+        | 213.098  | -0.003 |
| 252.1054                     | HGGH                                       | HGG                             | [b3]1+        | 252.109  | -0.004 |
| 252.1054                     | GHGH                                       | GHG                             | [b3]1+        | 252.109  | -0.004 |
| 252.1054                     | GGHH                                       | GGH                             | [b3]1+        | 252.109  | -0.004 |
| 270.1143                     | HHGG                                       | HGG                             | [y3]1+        | 270.12   | -0.006 |
| 270.1143                     | HGHG                                       | GHG                             | [y3]1+        | 270.12   | -0.006 |
| 270.1143                     | HGGH                                       | GGH                             | [y3]1+        | 270.12   | -0.006 |
| 293.1282                     | GGHH                                       | HH                              | [y2]1+        | 293.136  | -0.008 |
| 350.1525                     | GHHG                                       | HHG                             | [y3]1+        | 350.157  | -0.005 |
| 350.1525                     | GHGH                                       | HGH                             | [y3]1+        | 350.157  | -0.005 |
| 350.1525                     | GGHH                                       | GHH                             | [y3]1+        | 350.157  | -0.005 |

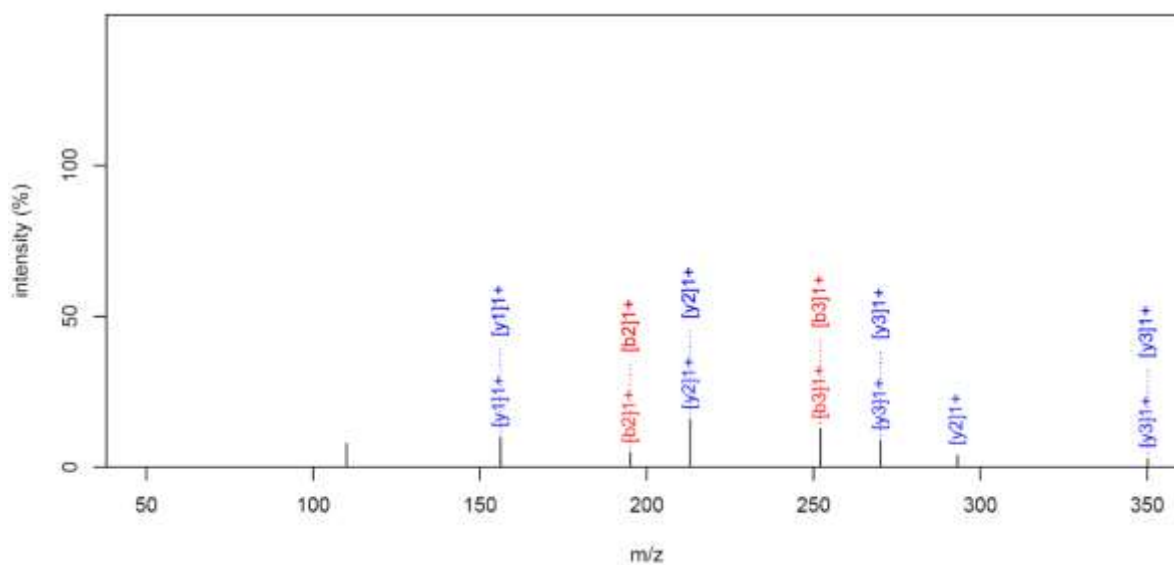

**Supplementary Figure 58:** Example MS/MS analyses of products of G and H monomer co-oligomerisation experiments. Spectrum (above) shows all the product ions resulting from MS/MS analysis of m/z = 407.179 (corresponding to a tetramer incorporating 2 x G and 2x H). A series of fragments are observed which can be assigned as those expected (below) from a number of different possible sequences which might be expected from tetramers incorporating 2 x G and 2 x H (ie. more than one sequence of the same composition is present, all incorporating G and H).

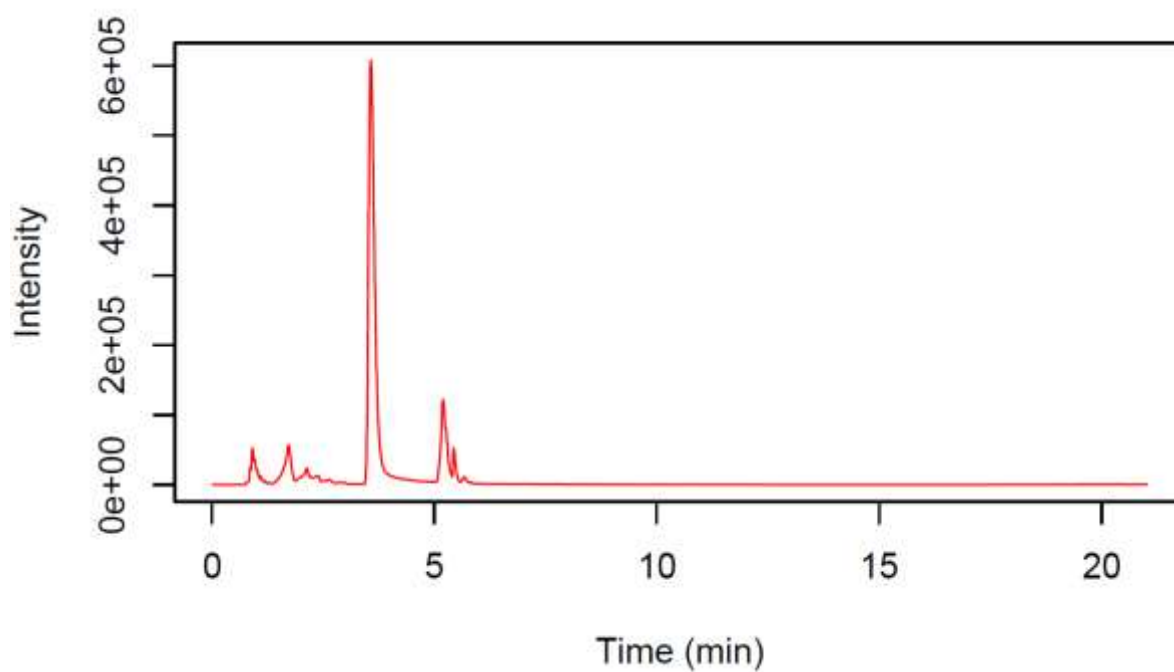

**Supplementary Figure 59:** “Virtual” BPC traces illustrating co-condensation of G and P monomers. VBPC is constructed from the EICs observed for a list of putative oligomers incorporating both of the amino acids monomers.

| Experimental Product ion m/z | Possible parent sequence(s) at m/z=363.115 | Possible production sequence(s) | Fragment type | MSMS m/z | Error  |
|------------------------------|--------------------------------------------|---------------------------------|---------------|----------|--------|
| 116.0691                     | PGGP                                       | P                               | [y1]1+        | 116.071  | -0.002 |
| 116.0691                     | GPGP                                       | P                               | [y1]1+        | 116.071  | -0.002 |
| 116.0691                     | GGPP                                       | P                               | [y1]1+        | 116.071  | -0.002 |
| 155.0795                     | PGPG                                       | PG                              | [b2]1+        | 155.082  | -0.002 |
| 155.0795                     | PGGP                                       | PG                              | [b2]1+        | 155.082  | -0.002 |
| 155.0795                     | GPPG                                       | GP                              | [b2]1+        | 155.082  | -0.002 |
| 155.0795                     | GPGP                                       | GP                              | [b2]1+        | 155.082  | -0.002 |
| 173.0896                     | PGPG                                       | PG                              | [y2]1+        | 173.092  | -0.002 |
| 173.0896                     | PGGP                                       | GP                              | [y2]1+        | 173.092  | -0.002 |
| 173.0896                     | GPPG                                       | PG                              | [y2]1+        | 173.092  | -0.002 |
| 173.0896                     | GPGP                                       | GP                              | [y2]1+        | 173.092  | -0.002 |
| 212.1                        | PGGP                                       | PGG                             | [b3]1+        | 212.103  | -0.003 |
| 212.1                        | GPGP                                       | GPG                             | [b3]1+        | 212.103  | -0.003 |
| 212.1                        | GGPP                                       | GGP                             | [b3]1+        | 212.103  | -0.003 |
| 230.1104                     | PPGG                                       | PGG                             | [y3]1+        | 230.114  | -0.004 |
| 230.1104                     | PGPG                                       | GPG                             | [y3]1+        | 230.114  | -0.004 |
| 230.1104                     | PGGP                                       | GGP                             | [y3]1+        | 230.114  | -0.004 |

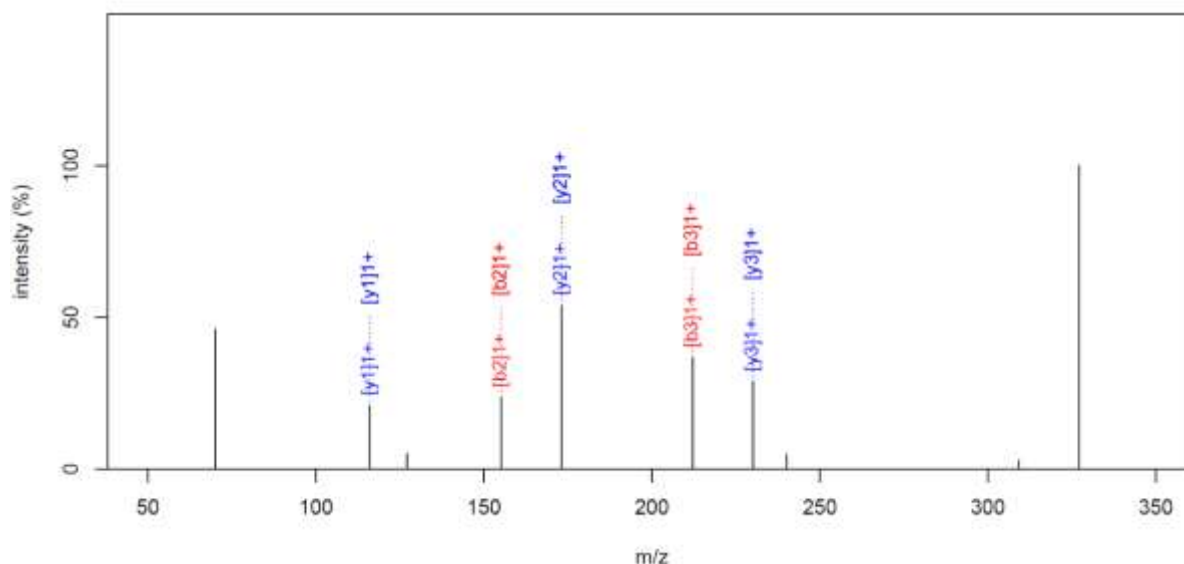

**Supplementary Figure 60:** Example MS/MS analyses of products of G and P monomer co-oligomerisation experiments. Spectrum (above) shows all the product ions resulting from MS/MS analysis of  $m/z = 327.166$  (corresponding to a tetramer incorporating 2 x G and 2 x P). A series of fragments are observed which can be assigned as those expected (below) from a number of different possible sequences which might be expected from tetramers incorporating 2 x G and 2 x P (ie. more than one sequence of the same composition is present, all incorporating G and P).

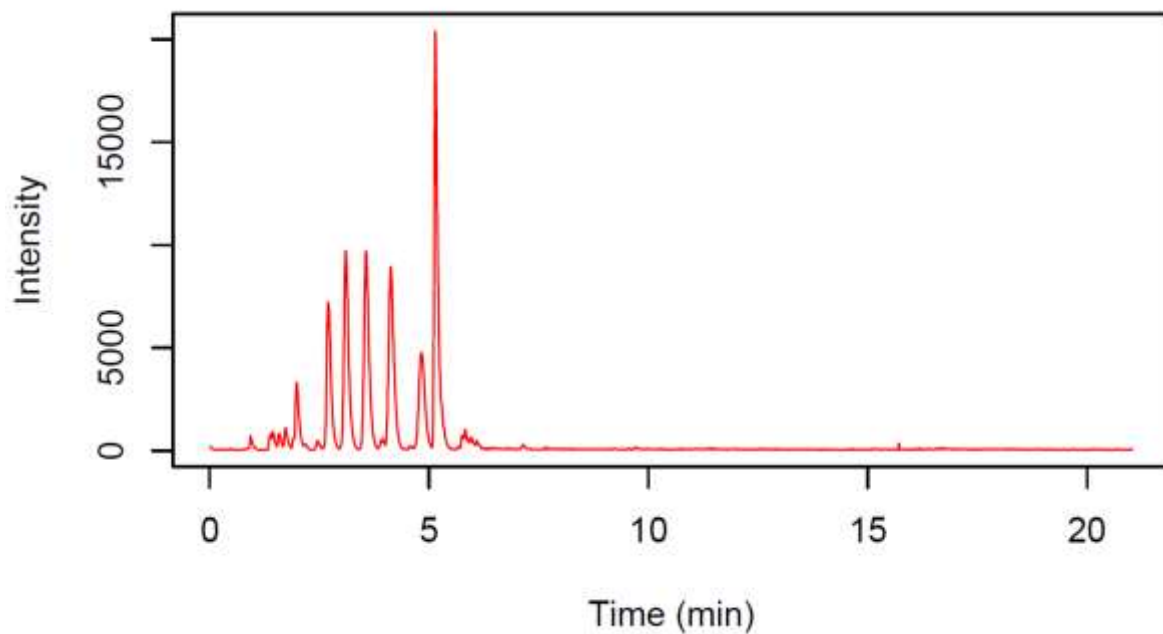

**Supplementary Figure 61:** “Virtual” BPC traces illustrating co-condensation of G and V monomers. VBPC is constructed from the EICs observed for a list of putative oligomers incorporating both of the amino acids monomers.

| Experimental Product ion m/z | Possible parent sequence(s) at m/z=363.115 | Possible production sequence(s) | Fragment type | MSMS m/z | Error  |
|------------------------------|--------------------------------------------|---------------------------------|---------------|----------|--------|
| 115.0521                     | GGVV                                       | GG                              | [b2]1+        | 115.05   | 0.002  |
| 118.0793                     | VGGV                                       | V                               | [y1]1+        | 118.086  | -0.007 |
| 118.0793                     | GVGV                                       | V                               | [y1]1+        | 118.086  | -0.007 |
| 118.0793                     | GGVV                                       | V                               | [y1]1+        | 118.086  | -0.007 |
| 157.0938                     | VGVG                                       | VG                              | [b2]1+        | 157.097  | -0.003 |
| 157.0938                     | VGGV                                       | VG                              | [b2]1+        | 157.097  | -0.003 |
| 157.0938                     | GVVG                                       | GV                              | [b2]1+        | 157.097  | -0.003 |
| 157.0938                     | GVGV                                       | GV                              | [b2]1+        | 157.097  | -0.003 |
| 175.1017                     | VGVG                                       | VG                              | [y2]1+        | 175.108  | -0.006 |
| 175.1017                     | VGGV                                       | GV                              | [y2]1+        | 175.108  | -0.006 |
| 175.1017                     | GVVG                                       | VG                              | [y2]1+        | 175.108  | -0.006 |
| 175.1017                     | GVGV                                       | GV                              | [y2]1+        | 175.108  | -0.006 |
| 214.119                      | VGGV                                       | VGG                             | [b3]1+        | 214.119  | 0      |
| 214.119                      | GVGV                                       | GVG                             | [b3]1+        | 214.119  | 0      |
| 214.119                      | GGVV                                       | GGV                             | [b3]1+        | 214.119  | 0      |
| 232.1239                     | VVGG                                       | VGG                             | [y3]1+        | 232.129  | -0.005 |
| 232.1239                     | VGVG                                       | GVG                             | [y3]1+        | 232.129  | -0.005 |
| 232.1239                     | VGGV                                       | GGV                             | [y3]1+        | 232.129  | -0.005 |

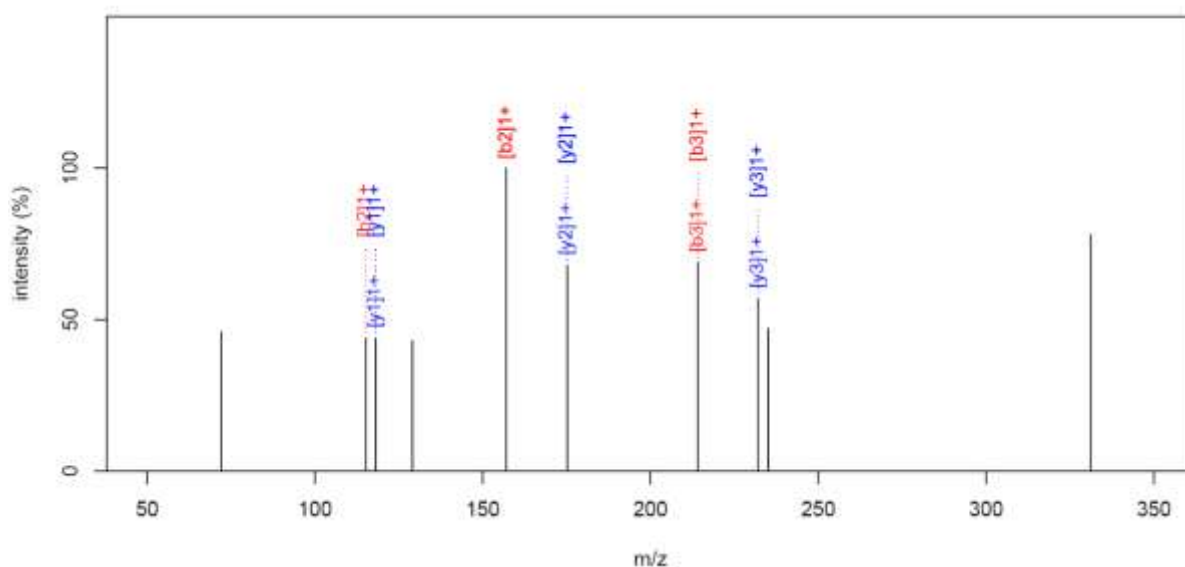

**Supplementary Figure 62:** Example MS/MS analyses of products of G and V monomer co-oligomerisation experiments. Spectrum (above) shows all the product ions resulting from MS/MS analysis of m/z = 331.198 (corresponding to a tetramer incorporating 2 x G and 2x V). A series of fragments are observed which can be assigned as those expected (below) from a number of different possible sequences which might be expected from tetramers incorporating 2 x G and 2 x V (ie. more than one sequence of the same composition is present, all incorporating G and V).

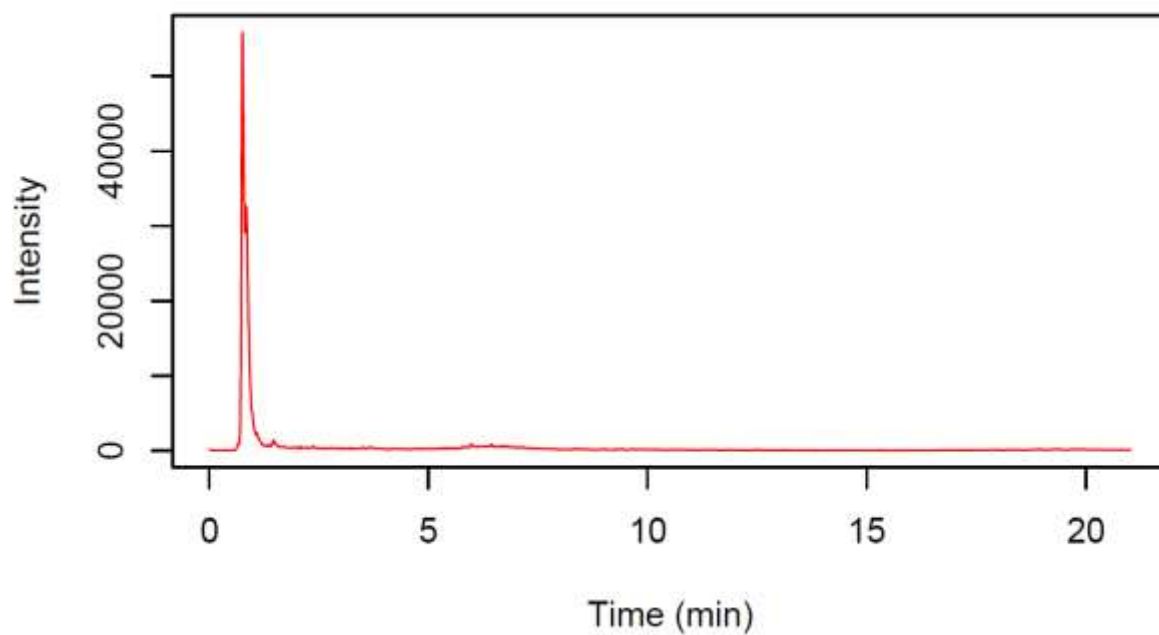

**Supplementary Figure 63:** “Virtual” BPC traces illustrating co-condensation of G and T monomers. VBPC is constructed from the EICs observed for a list of putative oligomers incorporating both of the amino acids monomers.

| Experimental Product ion m/z | Possible parent sequence(s) at m/z=363.115 | Possible production sequence(s) | Fragment type | MSMS m/z | Error  |
|------------------------------|--------------------------------------------|---------------------------------|---------------|----------|--------|
| 102.055                      | TTGG                                       | T                               | [b1]1+        | 102.055  | 0      |
| 102.055                      | TGTG                                       | T                               | [b1]1+        | 102.055  | 0      |
| 102.055                      | TGGT                                       | T                               | [b1]1+        | 102.055  | 0      |
| 115.0464                     | GGTT                                       | GG                              | [b2]1+        | 115.05   | -0.004 |
| 115.0853                     | GGTT                                       | GG                              | [b2]1+        | 115.05   | 0.035  |
| 120.0686                     | TGGT                                       | T                               | [y1]1+        | 120.066  | 0.003  |
| 120.0686                     | GTGT                                       | T                               | [y1]1+        | 120.066  | 0.003  |
| 120.0686                     | GGTT                                       | T                               | [y1]1+        | 120.066  | 0.003  |
| 133.0587                     | TTGG                                       | GG                              | [y2]1+        | 133.061  | -0.002 |
| 159.0758                     | TGTG                                       | TG                              | [b2]1+        | 159.076  | 0      |
| 159.0758                     | TGGT                                       | TG                              | [b2]1+        | 159.076  | 0      |
| 159.0758                     | GTTG                                       | GT                              | [b2]1+        | 159.076  | 0      |
| 159.0758                     | GTGT                                       | GT                              | [b2]1+        | 159.076  | 0      |
| 177.0841                     | TGTG                                       | TG                              | [y2]1+        | 177.087  | -0.003 |
| 177.0841                     | TGGT                                       | GT                              | [y2]1+        | 177.087  | -0.003 |
| 177.0841                     | GTTG                                       | TG                              | [y2]1+        | 177.087  | -0.003 |
| 177.0841                     | GTGT                                       | GT                              | [y2]1+        | 177.087  | -0.003 |
| 203.099                      | TTGG                                       | TT                              | [b2]1+        | 203.103  | -0.004 |
| 216.0929                     | TGGT                                       | TGG                             | [b3]1+        | 216.098  | -0.005 |
| 216.0929                     | GTGT                                       | GTG                             | [b3]1+        | 216.098  | -0.005 |
| 216.0929                     | GGTT                                       | GGT                             | [b3]1+        | 216.098  | -0.005 |
| 221.1111                     | GGTT                                       | TT                              | [y2]1+        | 221.113  | -0.002 |
| 234.1073                     | TTGG                                       | TGG                             | [y3]1+        | 234.108  | -0.001 |
| 234.1073                     | TGTG                                       | GTG                             | [y3]1+        | 234.108  | -0.001 |
| 234.1073                     | TGGT                                       | GGT                             | [y3]1+        | 234.108  | -0.001 |
| 260.131                      | TTGG                                       | TTG                             | [b3]1+        | 260.124  | 0.007  |
| 260.131                      | TGTG                                       | TGT                             | [b3]1+        | 260.124  | 0.007  |
| 260.131                      | GTTG                                       | GTT                             | [b3]1+        | 260.124  | 0.007  |

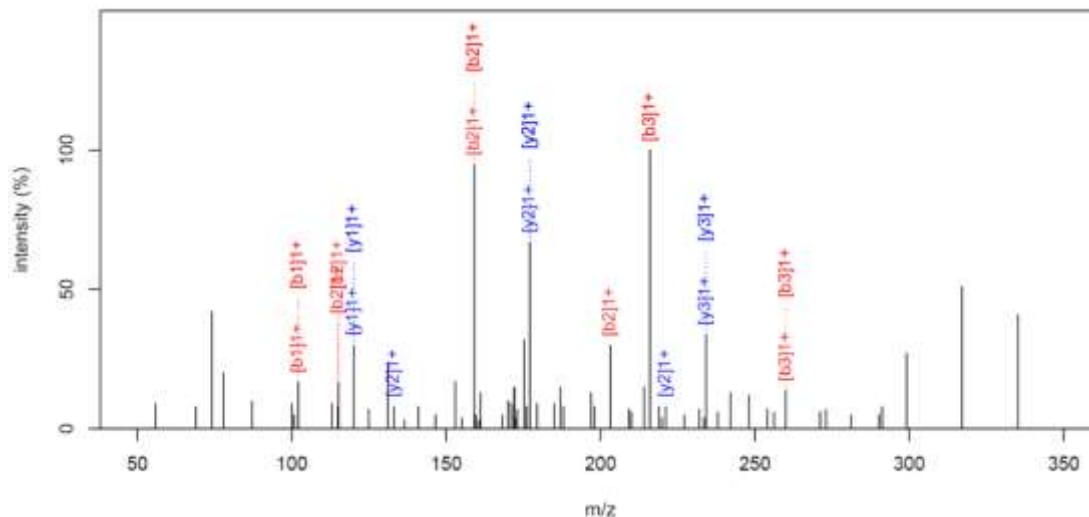

**Supplementary Figure 64:** Example MS/MS analyses of products of G and T monomer co-oligomerisation experiments. Spectrum (above) shows all the product ions resulting from MS/MS analysis of  $m/z = 335.156$  (corresponding to a tetramer incorporating 2 x G and 2 x T). A series of fragments are observed which can be assigned as those expected (below) from a number of different possible sequences which might be expected from tetramers incorporating 2 x G and 2 x T (ie. more than one sequence of the same composition is present, all incorporating G and T).



a

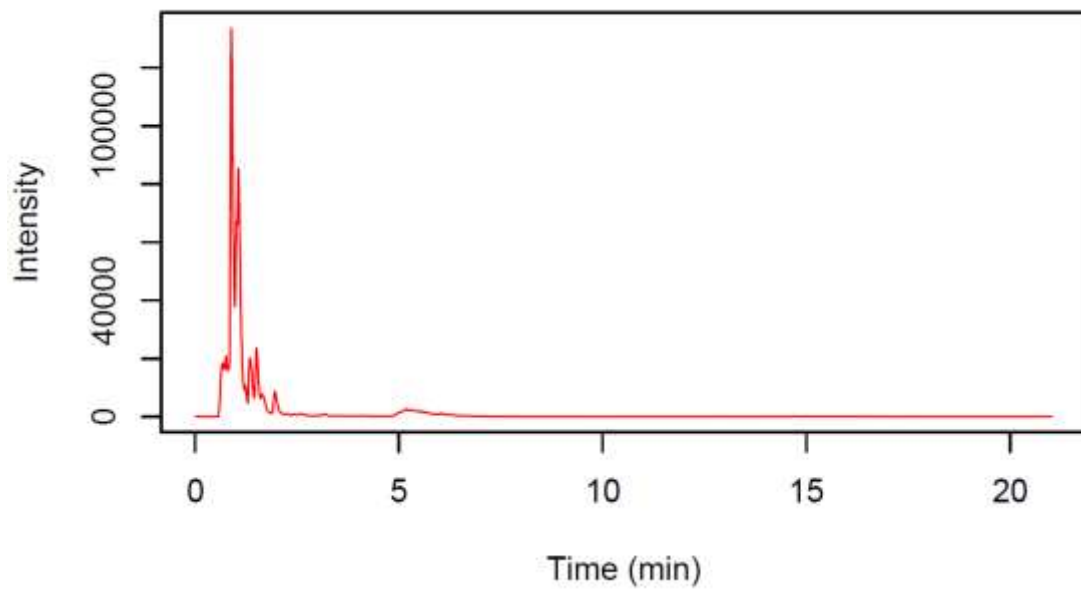

b

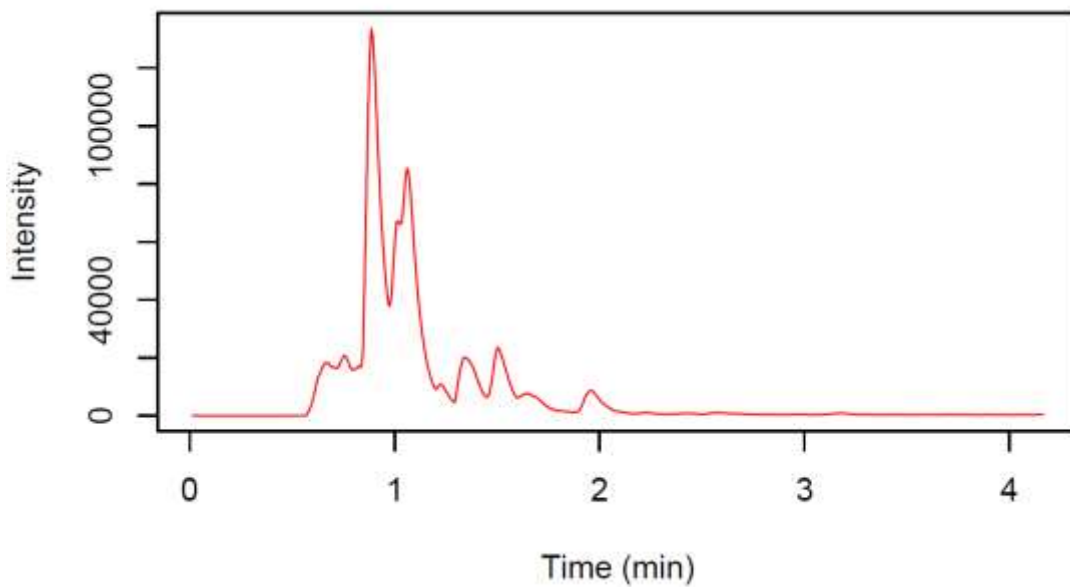

**Supplementary Figure 65:** “Virtual” BPC traces illustrating co-condensation of G, A and K monomers. VBPC is constructed from the EICs observed for a list of putative oligomers incorporating all three of the amino acids monomers. A) shows the entire VBPC spectra and B) focuses on the region of the spectra where peaks from the co-condensation products are easily observed.

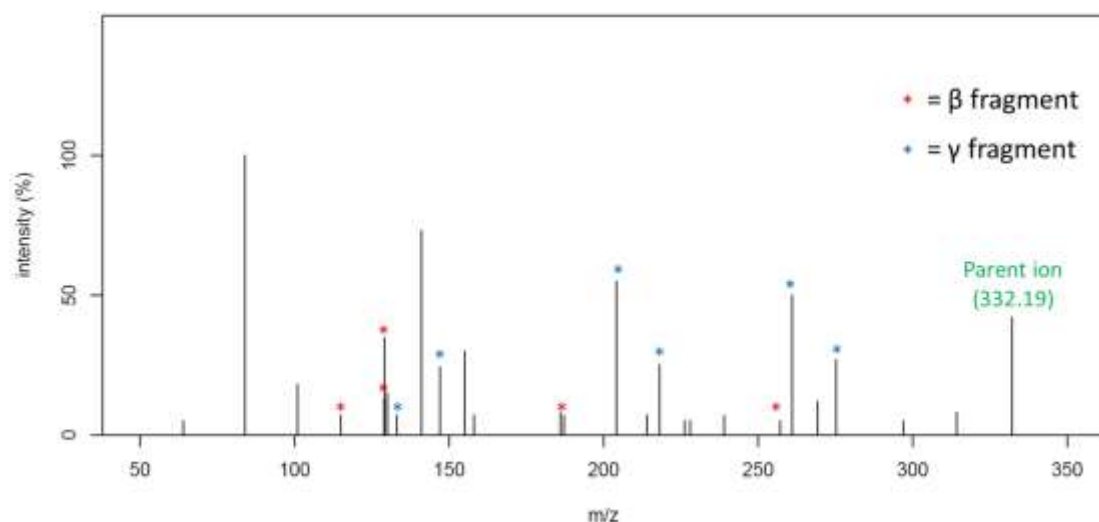

| Experimental product ion m/z | Possible parent ion sequence(s) at m/z = 332.09 | Possible product ion sequence(s) | Fragment type | MS/MS m/z |
|------------------------------|-------------------------------------------------|----------------------------------|---------------|-----------|
| 115.0491                     | GGKA                                            | GG                               | [b2]1+        | 115.05    |
| 115.0491                     | GGAK                                            | GG                               | [b2]1+        | 115.05    |
| 129.0655                     | GAKG                                            | GA                               | [b2]1+        | 129.066   |
| 129.0655                     | GAGK                                            | GA                               | [b2]1+        | 129.066   |
| 129.0655                     | AGKG                                            | AG                               | [b2]1+        | 129.066   |
| 129.0655                     | AGGK                                            | AG                               | [b2]1+        | 129.066   |
| 129.1008                     | KGGA                                            | K                                | [b1]1+        | 129.102   |
| 129.1008                     | KGAG                                            | K                                | [b1]1+        | 129.102   |
| 129.1008                     | KAAG                                            | K                                | [b1]1+        | 129.102   |
| 133.0597                     | KAGG                                            | GG                               | [y2]1+        | 133.061   |
| 133.0597                     | AKGG                                            | GG                               | [y2]1+        | 133.061   |
| 147.1115                     | KGGA                                            | GA                               | [y2]1+        | 147.076   |
| 147.1115                     | KGAG                                            | AG                               | [y2]1+        | 147.076   |
| 147.1115                     | GKGA                                            | GA                               | [y2]1+        | 147.076   |
| 147.1115                     | GKAG                                            | AG                               | [y2]1+        | 147.076   |
| 147.1115                     | GGAK                                            | K                                | [y1]1+        | 147.113   |
| 147.1115                     | GAGK                                            | K                                | [y1]1+        | 147.113   |
| 147.1115                     | AGGK                                            | K                                | [y1]1+        | 147.113   |
| 186.0866                     | GGAK                                            | GGA                              | [b3]1+        | 186.087   |
| 186.0866                     | GAGK                                            | GAG                              | [b3]1+        | 186.087   |
| 186.0866                     | AGGK                                            | AGG                              | [b3]1+        | 186.087   |
| 186.1216                     | KGGA                                            | KG                               | [b2]1+        | 186.124   |
| 186.1216                     | KGAG                                            | KG                               | [b2]1+        | 186.124   |

| Experimental product ion m/z | Possible parent ion sequence(s) at m/z = 332.09 | Possible product ion sequence(s) | Fragment type | MS/MS m/z |
|------------------------------|-------------------------------------------------|----------------------------------|---------------|-----------|
| 186.1216                     | GKGA                                            | GK                               | [b2]1+        | 186.124   |
| 186.1216                     | GKAG                                            | GK                               | [b2]1+        | 186.124   |
| 204.1317                     | GAKG                                            | KG                               | [y2]1+        | 204.134   |
| 204.1317                     | GAGK                                            | GK                               | [y2]1+        | 204.134   |
| 204.1317                     | AGKG                                            | KG                               | [y2]1+        | 204.134   |
| 204.1317                     | AGGK                                            | GK                               | [y2]1+        | 204.134   |
| 218.1468                     | GGKA                                            | KA                               | [y2]1+        | 218.15    |
| 218.1468                     | GGAK                                            | AK                               | [y2]1+        | 218.15    |
| 257.159                      | KGAG                                            | KGA                              | [b3]1+        | 257.161   |
| 257.159                      | KAGG                                            | KAG                              | [b3]1+        | 257.161   |
| 257.159                      | GKAG                                            | GKA                              | [b3]1+        | 257.161   |
| 257.159                      | GAKG                                            | GAK                              | [b3]1+        | 257.161   |
| 257.159                      | AKGG                                            | AKG                              | [b3]1+        | 257.161   |
| 257.159                      | AGKG                                            | AGK                              | [b3]1+        | 257.161   |
| 261.1533                     | AKGG                                            | KGG                              | [y3]1+        | 261.156   |
| 261.1533                     | AGKG                                            | GKG                              | [y3]1+        | 261.156   |
| 261.1533                     | AGGK                                            | GGK                              | [y3]1+        | 261.156   |
| 275.1684                     | GKGA                                            | KGA                              | [y3]1+        | 275.171   |
| 275.1684                     | GKAG                                            | KAG                              | [y3]1+        | 275.171   |
| 275.1684                     | GGKA                                            | GKA                              | [y3]1+        | 275.171   |
| 275.1684                     | GGAK                                            | GAK                              | [y3]1+        | 275.171   |
| 275.1684                     | GAKG                                            | AKG                              | [y3]1+        | 275.171   |
| 275.1684                     | GAGK                                            | AGK                              | [y3]1+        | 275.171   |

**Supplementary Figure 66:** Example MS/MS analyses of products of G, A, and K monomer co-oligomerisation experiments. Spectrum (above) shows all the product ions resulting from MS/MS analysis of m/z = 332.09 (corresponding to a tetramer incorporating 2 x G, 1 x A, and 1 x K) eluted over t = 0.5 – 2 min in RP-HPLC-MS. A series of fragments are observed which can be assigned as those expected (below) from a number of different possible sequences which might be expected from tetramers incorporating 2 x G, 1 x A, and 1 x K (i.e. more than one sequence of the same composition is present, all incorporating G, A, and K).

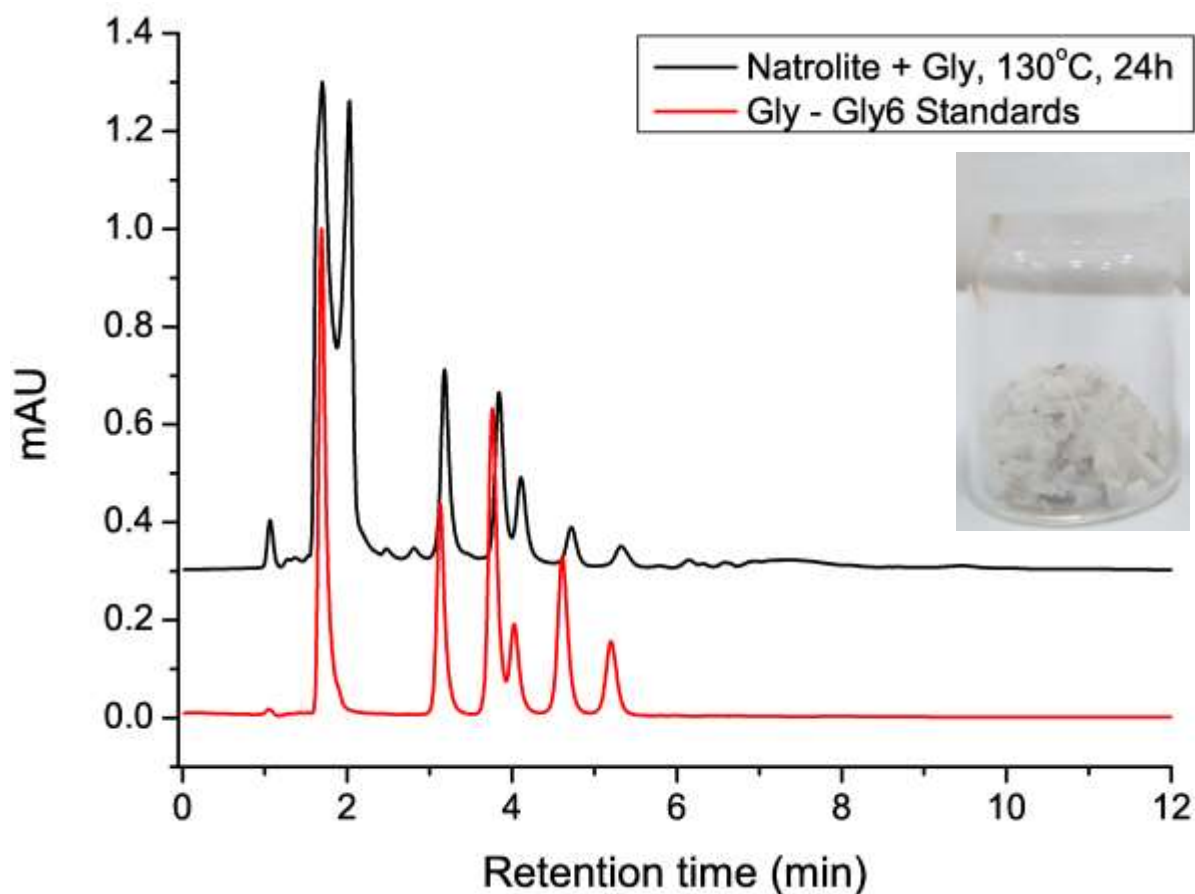

**Supplementary Figure 67:** IP-HPLC chromatogram of glycine oligomerisation products with natrolite mineral (24h, 130°C) compared to Gly, (Gly)<sub>2-6</sub> standards. Inset: a vial containing natrolite.

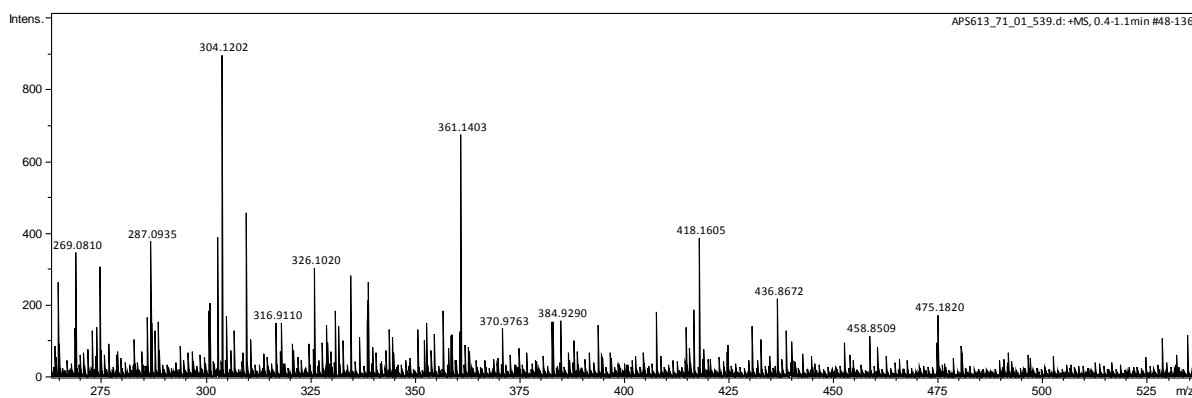

**Supplementary Figure 68:** MS of integration of the 0.5-1.5 min area of the RP-HPLC-MS of the natrolite experiment, clearly showing a peak at 418.168 and 475.19 (7-mer and 8-mer, respectively). This can also be seen in the EIC.

**Supplementary Table 1:** Table of calculated yields vs. dehydration time at 90°C /110°C / 130°C at pH9.8.

| <b>Dehydration time (hours)</b> | <b>90°C</b> | <b>Error(%)</b> | <b>110°C</b> | <b>Error(%)</b> | <b>130°C</b> | <b>Error(%)</b> |
|---------------------------------|-------------|-----------------|--------------|-----------------|--------------|-----------------|
| <b>1</b>                        | 0.07        | 7.87295822      | 0.05476007   | 21.36           | 0.0786       | 0.00            |
| <b>3</b>                        | 0.37        | 12.38534        | 2.262746011  | 3.75            | 17.20836179  | 1.52            |
| <b>7</b>                        | 0.65        | 19.01494        | 8.043332904  | 9.04            | 37.87169978  | 3.93            |
| <b>15</b>                       | 7.58        | 6.21074         | 15.81516302  | 9.35            | 42.51868225  | 4.23            |
| <b>24</b>                       | 7.8667      | 4.27378351      | 24.37700448  | 0.32            | 38.58585171  | 2.56            |
| <b>48</b>                       | 12.04       | 13.65692        | 34.96651851  | 0.36            | 35.07398746  | 3.10            |
| <b>72</b>                       | 18.4133     | 3.354           | 41.66696797  | 3.48            | 33.5822961   | 3.73            |
| <b>96</b>                       | 22.25667    | 0.922556        | 39.17051687  | 7.60            | 29.47759773  | 1.07            |

**Supplementary Table 2:** Table of calculated yields vs. pH at 130°C after 24h.

| pH    | 130°C       | Error(%) |
|-------|-------------|----------|
| 2.15  | 19.80966425 | 8.498902 |
| 2.95  | 8.119637164 | 11.12281 |
| 3.90  | 1.554716719 | 7.308297 |
| 4.85  | 0.287135193 | 6.280165 |
| 6.10  | 0.797804131 | 11.23695 |
| 8.00  | 3.719450448 | 2.93288  |
| 8.67  | 6.047332728 | 5.277626 |
| 8.90  | 11.15483399 | 4.514116 |
| 9.30  | 21.13742904 | 4.045178 |
| 9.60  | 33.44756051 | 3.894415 |
| 9.80  | 38.56432132 | 4.599946 |
| 10.00 | 44.70615593 | 1.827024 |

**Supplementary Table 3:** Table of calculated oligomer concentrations vs. number of hydration-dehydration cycles at 130°C after 24h. Yields calculated as a percentage of the Gly starting material accounted for each product.

| <b>[Oligomer] (mM)</b>  | <b>Cycle 1</b> | <b>Cycle 2</b> | <b>Cycle 3</b> | <b>Cycle 4</b> |
|-------------------------|----------------|----------------|----------------|----------------|
| <b>Gly<sub>2</sub></b>  | 13.96          | 10.26          | 9.42           | 8.36           |
| <b>Gly<sub>3</sub></b>  | 10.40          | 7.70           | 6.46           | 5.41           |
| <b>Gly<sub>4</sub></b>  | 7.61           | 5.95           | 5.11           | 4.41           |
| <b>Gly<sub>5</sub></b>  | 5.11           | 4.23           | 3.53           | 3.07           |
| <b>Gly<sub>6</sub></b>  | 3.64           | 3.71           | 3.37           | 3.03           |
| <b>Gly<sub>7</sub></b>  | 1.91           | 2.07           | 1.94           | 1.67           |
| <b>Gly<sub>8</sub></b>  | 1.91           | 2.05           | 1.07           | 0.64           |
| <b>Gly<sub>9</sub></b>  | 1.09           | 1.30           | 0.77           | 0.66           |
| <b>Gly<sub>10</sub></b> | 0.81           | 0.93           | 0.81           | 0.74           |
| <b>Gly<sub>11</sub></b> | 0.20           | 0.32           | 0.28           | 0.26           |
| <b>Gly<sub>12</sub></b> | 0.40           | 0.56           | 0.40           | 0.38           |
| <b>Gly<sub>13</sub></b> | 0.11           | 0.34           | 0.30           | 0.25           |

**Supplementary Table 4:** Concentration of glycine oligomers formed against glycine monomer input concentration.

| <b>[Starting material] (M)</b> | <b>[Gly<sub>2</sub>] (mM)</b> | <b>[Gly<sub>3</sub>] (mM)</b> |
|--------------------------------|-------------------------------|-------------------------------|
| 10 <sup>-4</sup> M             | 0.007                         | 0.003                         |
| 10 <sup>-3</sup> M             | 0.159                         | 0.015                         |
| 10 <sup>-2</sup> M             | 0.376                         | 0.155                         |
| 10 <sup>-1</sup> M             | 1.292                         | 1.750                         |

**Supplementary Table 5:** Table of amide N-H and C=O stretches. N-H stretch: secondary amide produces one N-H stretch at 3500-3100  $\text{cm}^{-1}$ . C=O stretch: carboxyl groups in amide produces one C=O stretch at 1690-1630  $\text{cm}^{-1}$ .

| Sample/standard                               | IR AMIDE SIGNAL                     |                                     |
|-----------------------------------------------|-------------------------------------|-------------------------------------|
|                                               | N-H stretch<br>( $\text{cm}^{-1}$ ) | C=O stretch<br>( $\text{cm}^{-1}$ ) |
| Gly <sub>2</sub> – Gly <sub>6</sub> standards | 3307                                | 1634                                |
| Reaction carried out without NaCl addition    | 3271                                | 1640                                |
| Reaction carried out with NaCl addition       | 3871                                | 1640                                |

**Supplementary Table 6:** Biuret assay data processing.

|                                           | Sample             | Abs    | Abs - 0       | conc (G5) | conc (G6) | conc (avg)    |
|-------------------------------------------|--------------------|--------|---------------|-----------|-----------|---------------|
| <b>Blank</b>                              | <b>0</b>           | 0.0275 | <b>0</b>      | 0         | 0         | <b>0</b>      |
| <b>Pentaglycine</b>                       | <b>G5-0.1mg/ml</b> | 0.0669 | <b>0.0394</b> | 0.1044    | 0.1217    | <b>0.1130</b> |
|                                           | <b>G5-0.3mg/ml</b> | 0.142  | <b>0.1145</b> | 0.3033    | 0.3536    | <b>0.3284</b> |
|                                           | <b>G5-0.5mg/ml</b> | 0.2152 | <b>0.1877</b> | 0.4972    | 0.5796    | <b>0.5384</b> |
| <b>Hexaglycine</b>                        | <b>G6-0.1mg/ml</b> | 0.0596 | <b>0.0321</b> | 0.0850    | 0.0991    | <b>0.0921</b> |
|                                           | <b>G6-0.3mg/ml</b> | 0.1193 | <b>0.0918</b> | 0.2432    | 0.2835    | <b>0.2633</b> |
|                                           | <b>G6-0.5mg/ml</b> | 0.1927 | <b>0.1652</b> | 0.4376    | 0.5101    | <b>0.4738</b> |
| <b>APS Samples<br/>(dehydration time)</b> | <b>15h</b>         | 0.0972 | <b>0.0697</b> | 0.1846    | 0.2152    | <b>0.1999</b> |
|                                           | <b>24h</b>         | 0.1519 | <b>0.1244</b> | 0.3295    | 0.3841    | <b>0.3568</b> |
|                                           | <b>72h</b>         | 0.2171 | <b>0.1896</b> | 0.5022    | 0.5854    | <b>0.5438</b> |

## **Supplementary Methods**

### **LabView Control Software**

The control over the fluids described in the manuscript is implemented with Tricontinent syringe pumps operated through a USB to Serial connection to a laptop (Dell Latitude 3440). We developed a user interface for simple control of the pumps as well as easier implementation of the experimental design through National Instruments LabVIEW 2013 SP1 (32 bit). Figures S3-S6 show screen shots of the main control software, “pump\_control.vi,” as well as an important Sub VI, “Pick up and Deliver (dist vale).vi”. Commands are sent with the inbuilt VISA functions included with a LabVIEW installation. The Tricontinent C-Series Precision Pump (C3000/C24000) Software Manual and the C3000 Precision Pump Operator’s Manual (available from the Tricontinent website, <http://www.tricontinent.com>) were used to inform the writing this control software (see Supplementary Figs 3-6).

### **HPLC analysis and characterisation of glycine homo-oligomers**

#### **Dehydration time dependence experiments**

Starting from an aqueous solution of glycine monomer and keeping the reaction at pH=9.75, we show the conversion to oligomers depending on the dehydration time (after 1, 3, 5, 7, 15 and 24 h) at three different temperatures (90, 110 and 130 °C). The highest conversion takes places after 15h.

In all experiments, Glycine (350µl from a 1M Gly solution, so  $3.5 \cdot 10^{-4}$  moles) was mixed with 1 ml of a 1M solution of NaCl + 2.55 ml HPLC water at pH=9.75 (adjusted by adding 100 microliters of NaOH 1M) .

Each sample was dehydrated in a single cycle for different periods of time: 1, 3, 5, 7, 15, 24, 48, 72 and 96h. Once finished, products were prepared for analysis by dissolution in 8ml of a 0.1% TFA aqueous solution (see Supplementary Table 1 and Supplementary Figs 9 and 10).



### **pH dependence experiments**

Starting from an aqueous solution of glycine monomer and keeping the reaction at the same temperature (130°C) for a dehydrating time of 24 hours, we show the conversion to oligomers depending on the pH (between pH=10.0 and 2.15).

In all experiments, Glycine (350µl from a 1M Gly solution, so  $3.5 \cdot 10^{-4}$  moles) was mixed with 1 ml of a 1M solution of NaCl + 2.55 ml HPLC water at various pH values (adjusted by adding a 1M NaOH or 1M HCl solution). Once finished, products were prepared for analysis by dissolution in 8ml of a 0.1% TFA aqueous solution (see Supplementary Table 2 and Supplementary Figs 11-13).

### **Cycle dependency experiments**

Starting from an aqueous solution of glycine monomer and keeping the reaction at the same temperature (130°C) and pH= 2.61 for a dehydrating time of 24 hours, we show the conversion to oligomers depending on number of hydration-dehydration cycles ( $n=1-3$ ).

In all experiments, Glycine (350µl from a 1M Gly solution, so  $3.5 \cdot 10^{-4}$  moles) was mixed with 1 ml of a 1M solution of NaCl + 2.60 ml HPLC water, and adjusted to pH=2.61 by adding 50 µl of a 1M HCl solution.

Each sample was dehydrated and subsequently rehydrated for a given number of cycles. Once finished, products were prepared for analysis by dissolution in 8ml of a 0.1% TFA aqueous solution (see Supplementary Table 3 and Supplementary Fig 14).

### **Concentration dependency experiments**

Starting from an aqueous solution of glycine monomer and keeping the reaction at the same temperature (130°C) and pH= 9.8 for a dehydrating time of 24 hours, we show the conversion to oligomers depending on the concentration of the starting material.

Four solutions of Glycine monomer were prepared at different concentrations ( $10^{-1}$ M,  $10^{-2}$ M,  $10^{-3}$ M and  $10^{-4}$ M), and adjusted at pH 9.8 by using NaOH 1M. 350µl of each solution were added to 100µl of NaCl 1M + 500µl of HPLC water. The samples were dehydrated for 24h in

a single dehydration experiment. All the dried products were prepared for analysis by adding 1 ml of HPLC water (see Supplementary Table 4 and Supplementary Fig 15).

### **Glycinamide and DKP Oligomerisation Reactions**

In this experiment, DKP (0.0014g) was dissolved in 1 ml of a 1M solution of NaCl + 2.55 ml HPLC water, and adjusted to pH=9.75 using 1M NaOH. The sample was left to dehydrate for 24h in a single cycle dehydration experiment. Once finished, products were prepared for analysis by dissolution in 8ml of a 0.1% TFA aqueous solution (see Supplementary Figures 16).

In this experiment, Glycinamide (0.0014g) was dissolved in 1 ml of a 1M solution of NaCl + 2.55 ml HPLC water, and adjusted to pH=9.75 using 1M NaOH. The sample was left to dehydrate for 24h in a single cycle dehydration experiment. Once finished, products were prepared for analysis by dissolution in 8ml of a 0.1% TFA aqueous solution (see Supplementary Fig 17).

### **Glycine oligomerisation in a Teflon® vessel**

In this, Glycine (350µl from a 1M Gly solution) was mixed with 1 ml of a 1M solution of NaCl + 2.55 ml HPLC water, and adjusted to pH=9.75 using 1M NaOH. The sample was left to dehydrate for 24h in a single cycle dehydration experiment in a Teflon® vessel. Once finished, products were prepared for analysis by dissolution in 8ml of a 0.1% TFA aqueous solution (see Supplementary Fig 18).

### **Evidence for concurrent bond breakage and formation**

In this experiment, Glycylglycine (175µl from a 1M GlyGly solution, so  $1.75 \cdot 10^{-4}$  moles) was mixed with 1 ml of a 1M solution of NaCl + 2.725 ml HPLC water, and adjusted to pH=9.8 by adding 100 µl of a 1M NaOH solution. The reaction was left to dehydrate at a) 110 °C and b) 130°C for a single dehydration cycle. Once finished, products were prepared for analysis by dissolution in 8ml of a 0.1% TFA aqueous solution.

Since (Gly)<sub>n</sub> series are observed with odd-numbered n (i.e.  $n = 3, 5, 7$ , etc), we can conclude that peptide bonds must have been both broken and formed in the same experimental cycle.

We observe a greater occurrence of this at higher temperatures (see Supplementary Figs 19 and 20).

### **NaCl concentration dependence**

We show that conversion to oligomers does not depend strongly on the concentration of NaCl added to the starting solution, with a series of experiments.

Each experiment started from an aqueous solution of glycine monomer, and was maintained at 130°C and pH=9.75 for a dehydrating time of 15 hours.

In all experiments, Glycine (350µl from a 1M Gly solution, so  $3.5 \cdot 10^{-4}$  moles) was diluted in a total volume of 4ml. Different volumes of a 5M NaCl solution were added to adjust the NaCl concentration to 0, 0.025, 0.25 and 1 M. The pH was adjusted to 9.75 by adding 100 µl of a 1M NaOH solution (except in one case, where LiOH was used, to demonstrate that Na<sup>+</sup> was not vital). Each sample was dehydrated for one cycle. Once finished, products were prepared for analysis by dissolution in 8ml of a 0.1% TFA aqueous solution (see Supplementary Figs 21-23).

### **MS/MS Analysis of glycine homo-oligomers product ions**

The Supplementary Figures 24-28 include typical MS/MS spectra of (Gly)<sub>x</sub> oligopeptide products, clearly exhibiting fragmentation patterns consistent with their assigned structures, comprising multiple peptide bonds.

### **Direct infusion MS analysis of glycine homo-oligomers products**

The sample was prepared by taking an aliquot of 350 µl from a 1 M solution of glycine, to which we subsequently added: 1 ml of a 1M NaCl solution, 2 ml of (HPLC) water, and finally the pH was adjusted to 9.75 by adding 200 µl of 1M NaOH. The sample was processed in our APS system for 1 hydration-dehydration cycle with a dehydrating time of 24h. After extracting the sample with 4ml of HPLC water, it was analysed by HPLC, and then freeze dried for ESI-MS analysis.

The sample was solvated in water and diluted into a mixture of Water:MeOH 1:1 with 10% formic prior to analysis by positive nanospray. The expected  $(+H)^+$  series from  $n=2$  to  $n=7$  is clearly observed; further oligomers are obvious extending to higher mass as the  $Na^+$  adducts. The sample also seems to be a mixture, with at least one other series evident with the repeat unit of 57Da. i.e. ions at 550/607/664/721 (778) (see Supplementary Figs 29-39).

## **MALDI analysis of a glycine homo-oligomers solid fraction**

Sample was attempted by solvent-free MALDI, initially with CHCA ( $\alpha$ -Cyano-4-hydroxycinnamic acid) matrix typically used for peptide samples. However, no polymeric species and only matrix ions were observed. The analysis was repeated with DHB (2,5-dihydroxybenzoic acid) matrix, and now in addition to matrix ions, 4 oligomeric series were observed. The four series all have the expected repeat unit mass of 57Da, and correspond to  $[M+H]^+$ ,  $[M+Na]^+$ ,  $[M+K]^+$ , and the MALDI artefact  $[M-H+2Na]^+$ ; species for  $n=8$  can be observed considering only  $-H$  and  $-OH$  endgroups. Despite these four series splitting the ion intensity, oligomeric species are observable up to around 1300Da, corresponding to at least  $(Gly)_{20}$  (see Supplementary Fig 41).

## **IR, NMR and chemical tests of glycine homo-oligomers**

### **Transmission IR Spectroscopy**

The solid samples collected for IR analysis were obtained by the following experimental procedure:

Glycine (350 $\mu$ l from a 1M Gly solution, so  $3.5 \cdot 10^{-4}$  moles) was diluted to a total final volume of 4 ml and the pH adjusted to 9.5. Two different experiments were simultaneously performed with (1ml of a 1M NaCl solution) and without NaCl. Both samples were left to dehydrate at 130 °C for 15h, in order to evaporate the solution to complete dryness. Once a cycle was finished, the process was re-started by re-hydrating the sample with 4 mL of HPLC water, for a total number of 10 dehydration-hydration cycles.

Once finished, insoluble oligomeric products were separated from the supernatant by centrifugation and decantation. The solid was further washed by re-suspension in HPLC

grade water and freeze-dried overnight (see Supplementary Table 5 and Supplementary Figs 42 and 43).

### **<sup>1</sup>H-NMR Spectrometry**

For NMR analysis, deuterated DMSO was added to a sample from one of the peptide formation experiments and the mixture heated to aid dissolution. The saturated DMSO was then filtered into an NMR tube and a proton spectrum was taken. Using similar methods, saturated standards of the glycine monomer, dimer and trimer were also prepared. Looking specifically at the  $\alpha$ -proton region (ca. 3.5 to 5.5), we can see there is a strong similarity between the sample peaks and the peaks seen for the trimer standard (shown inset). Looking then at the amide proton region (ca. 7 to 11 ppm) for the sample and all standards, no peak could be observed for the monomer (as expected), while peaks could be observed for both the dimer and trimer. The sample showed a number of peaks in this region (as would be expected for a complex mixture of oligomers and side products), but peaks in the right regions for the dimer and trimer could be seen. This shows that the proton NMR is not at all inconsistent with the presence of amide bonds (see Supplementary Figs 44 and 45).

### **Qualitative chemical testing for peptide bonds**

Qualitative chemical testing for peptide bonds was performed using the Biuret test. 1ml of Biuret reagent (hydrated copper (II) sulfate, sodium hydroxide (NaOH) and potassium sodium tartrate.) was added to a solution of ~5mg amino acid/polyamino acid in 1ml of fresh 0.1M sodium hydroxide solution. A positive test for peptide bonds is shown by a colour change from pale blue to violet. As can be seen from the Supplementary Fig 46, Gly and Gly<sub>2</sub> are pale blue, whilst a standard solution of Gly<sub>3</sub> shows a pale violet colour, indicating that at least three amino acids residues are required for a positive test. Oligomeric products resulting from APS samples obtained after 1 and 3 dehydration cycles show positive violet colouration.

## **Quantitative Biuret assay**

Standard solutions of Gly<sub>5</sub> and Gly<sub>6</sub> were prepared in 0.1M NaOH at a concentration of 1 mg/ml. Further dilution steps were performed to achieve the following standard concentrations: 0.1mg/ml, 0.3mg/ml and 0.5mg/ml. Then they were diluted to a total volume of 0.5ml with 0.1M NaOH. APS samples were prepared using 0.1ml of sample dissolved in 0.4ml 0.1M NaOH. Then 0.5ml of Biuret reagent was added to the sample/standard diluted in 0.1M NaOH. Finally the solutions were shaken to ensure complete mixing and reaction.

The absorption was then measured at 540nm. A background chromatogram was taken of 0.5ml Biuret reagent in 0.5ml 0.1M NaOH (see Supplementary Table 6 and Supplementary Figs 47 and 48).

## **Experiment using natrolite mineral and glycine monomer**

Natrolite is a tectosilicate mineral species belonging to the zeolite group. It is a basic hydrated sodium and aluminium silicate with the formula  $\text{Na}_2\text{Al}_2\text{Si}_3\text{O}_{10}\cdot 2\text{H}_2\text{O}$ . Natrolite was obtained from Richard Tayler Minerals, Cobham, Surrey, England, and was used (crushed) without further purification.

In this experiment, Glycine (350 $\mu$ l from a 1M Gly solution, so  $3.5\cdot 10^{-4}$  moles) was dissolved in 4 ml water and added to ca. 500mg crushed natrolite. The sample was dehydrated in a single cycle for 24h at 130°C. All the dried products were extracted by adding 4 ml of HPLC water (see Supplementary Figs 49 and 50).

## **Hetero-oligomer synthesis**

In all experiments, Glycine (3.5ml from a 0.1M Gly solution, so  $3.5\cdot 10^{-4}$  moles) was mixed with 3.5ml of a 0.1M solution of a second amino acid (A, D, E, K, H, P, V and T). Then, 1 ml of a 1M solution of NaCl was added, and the pH was adjusted to pH = 3 using a small amount of 1M HCl solution. All samples were dehydrated at 130°C for 15h; they were rehydrated (4 ml of HPLC water) and dehydrated (again, 130°C for 15h) to achieve a total number of 5 dehydration-hydration cycles. Once finished, products were prepared for analysis by dissolution in 8ml of a 0.1% TFA aqueous solution.

## **Confirmation of the production of hetero-oligomers incorporating different amino acids**

Since increased complexity results from the co-condensation of multiple amino acid monomers and makes thorough characterization of all the resulting products (presuming a relatively uncontrolled/non-selective reaction) more challenging, a “virtual” BPC, constructed. This is derived from EICs resulting from a combinatorial list of the all possible oligomer-forming combinations of both/all the amino acids (i.e. only species incorporating all starting amino acids are represented, not homo-oligomers). In all cases many peaks are observed in these traces, suggesting the formation of many co-oligomerisation products.

Secondly, some representative components of these complex mixtures were chosen for MS/MS analysis to corroborate the peptide nature of the products observed (see Supplementary Figs 51-68).

# Supplementary References

- 1 Liao, W. L., Heo, G. Y., Dodder, N. G., Pikuleva, I. A., Turko, I. V. Optimizing the conditions of a multiple reaction monitoring assay for membrane proteins: quantification of cytochrome P450 11A1 and adrenodoxin reductase in bovine adrenal cortex and retina. *Anal. Chem.* **82**, 5760-5767 (2010).
- 2 R Development Core Team (2008). R: A language and environment for statistical computing. R Foundation for Statistical Computing, Vienna, Austria. ISBN 3-900051-07-0, URL <http://www.R-project.org>.
- 3 Chambers, M. C. *et al.* A cross-platform toolkit for mass spectrometry and proteomics. *Nature Biotech.* **30**, 918-920 (2012).
- 4 Smith, C. A., Want, E. J., O'Maille, G., Abagyan, R., Siuzdak, G. XCMS: Processing mass spectrometry data for metabolite profiling using nonlinear peak alignment, matching and identification. *Anal. Chem.* **78**, 779-787 (2006).
